# Supplementary material for: Genome-Wide Analysis of DNA Methylation before-and after Exercise in the Thoroughbred Horse with MeDIP-Seq
Source: PubMed Central journal article supplement — Mol Cells. 2015 Jan 30;38(3):210–20. doi: 10.14348/molcells.2015.2138 (PMC4363720; doi:10.14348/molcells.2015.2138), 2015-01-30

Supplementary Fig. 1.

JIGUSANG SERYEOK Before exercise

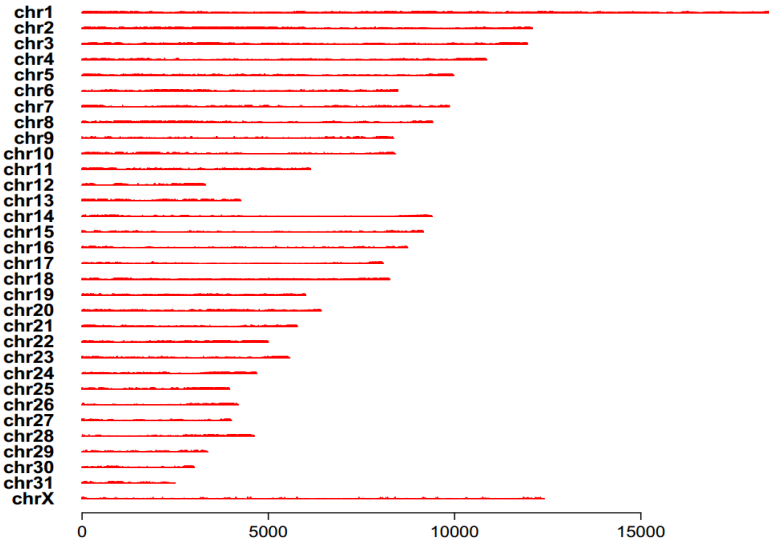

JIGUSANG SERYEOK After exercise

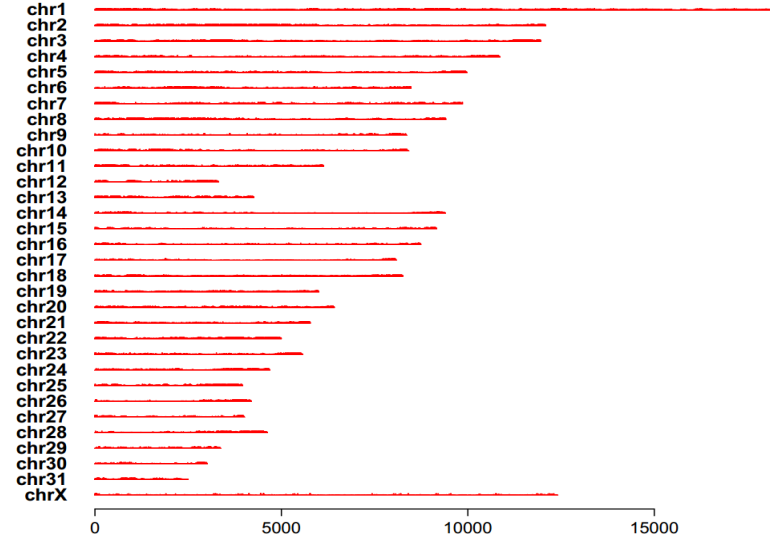

GEUMBIT SESANG Before exercise

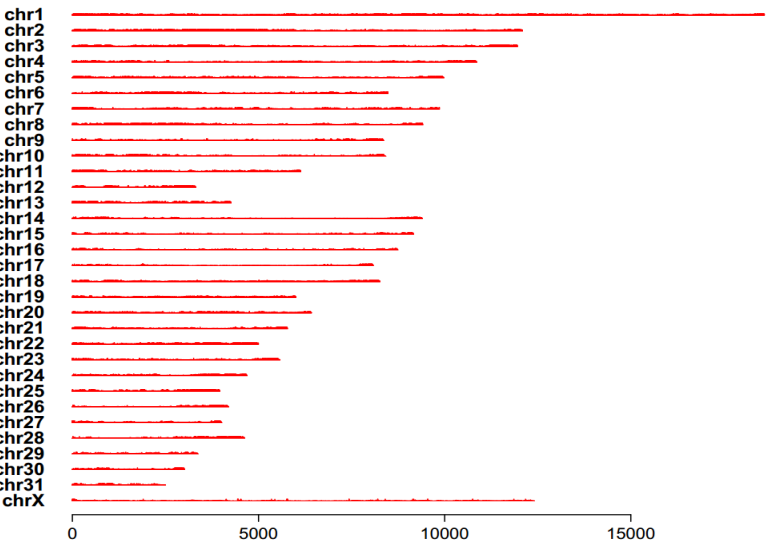

GEUMBIT SESANG After exercise

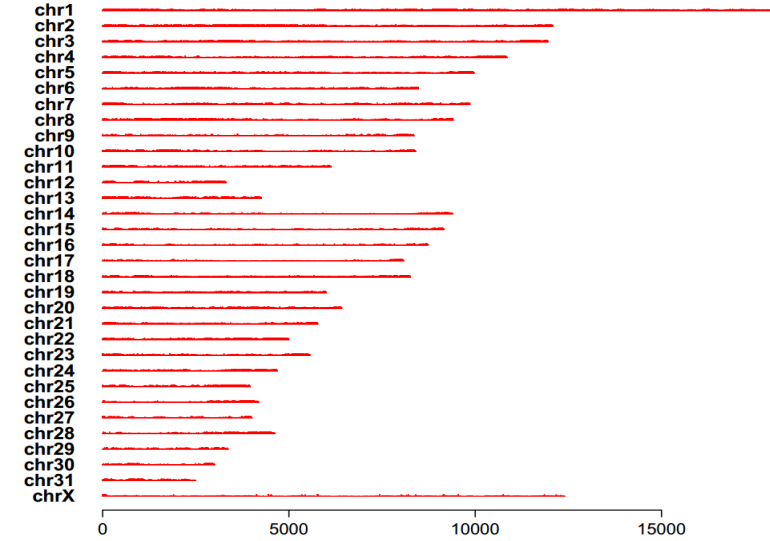

Supplementary Fig. 2.

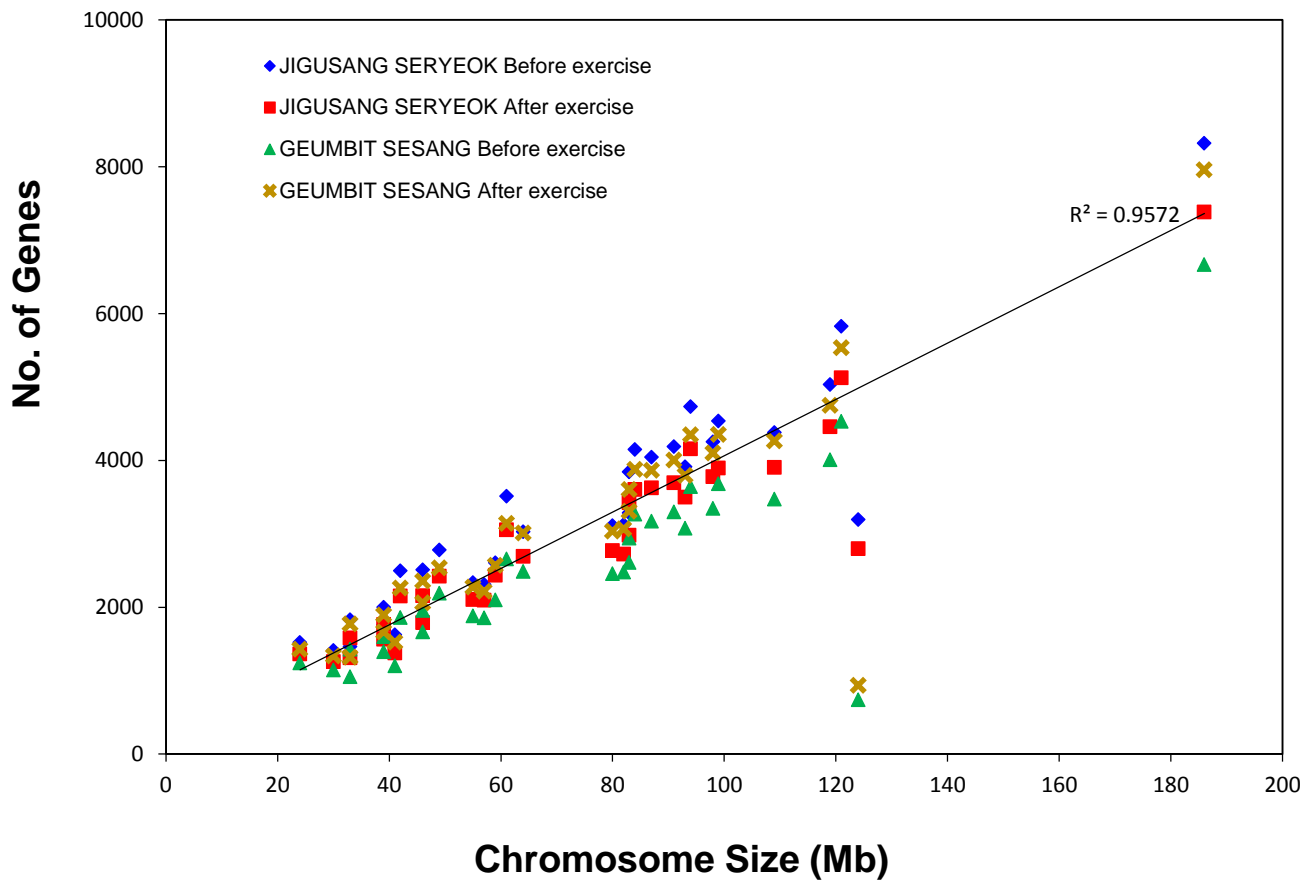

Supplementary Fig. 3.

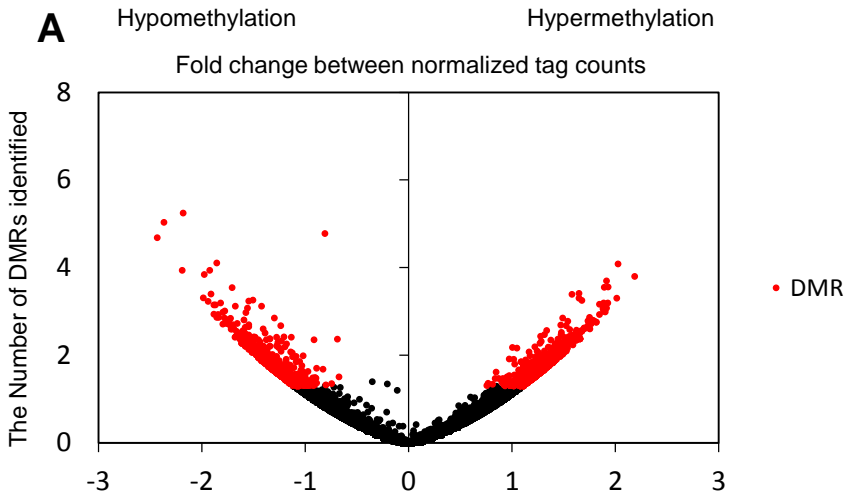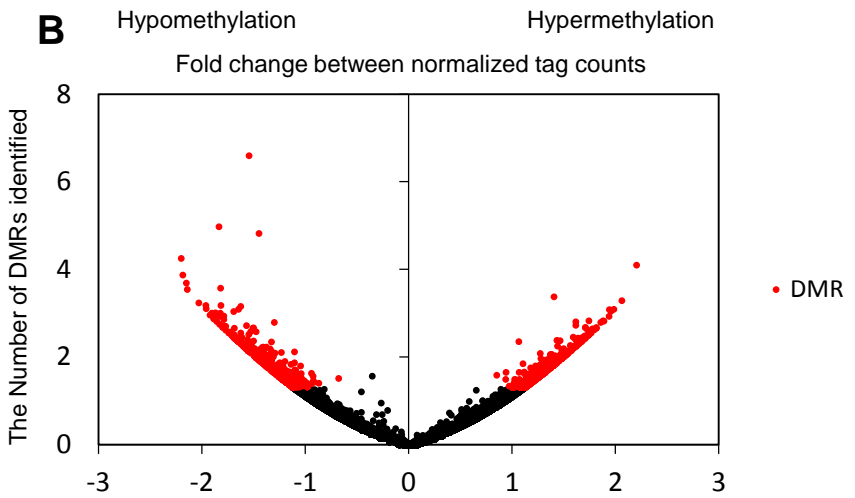

Supplementary Fig. 4.

# A Readsdepth of upstream of ZNF80 gene on chr19:43784920-43786715

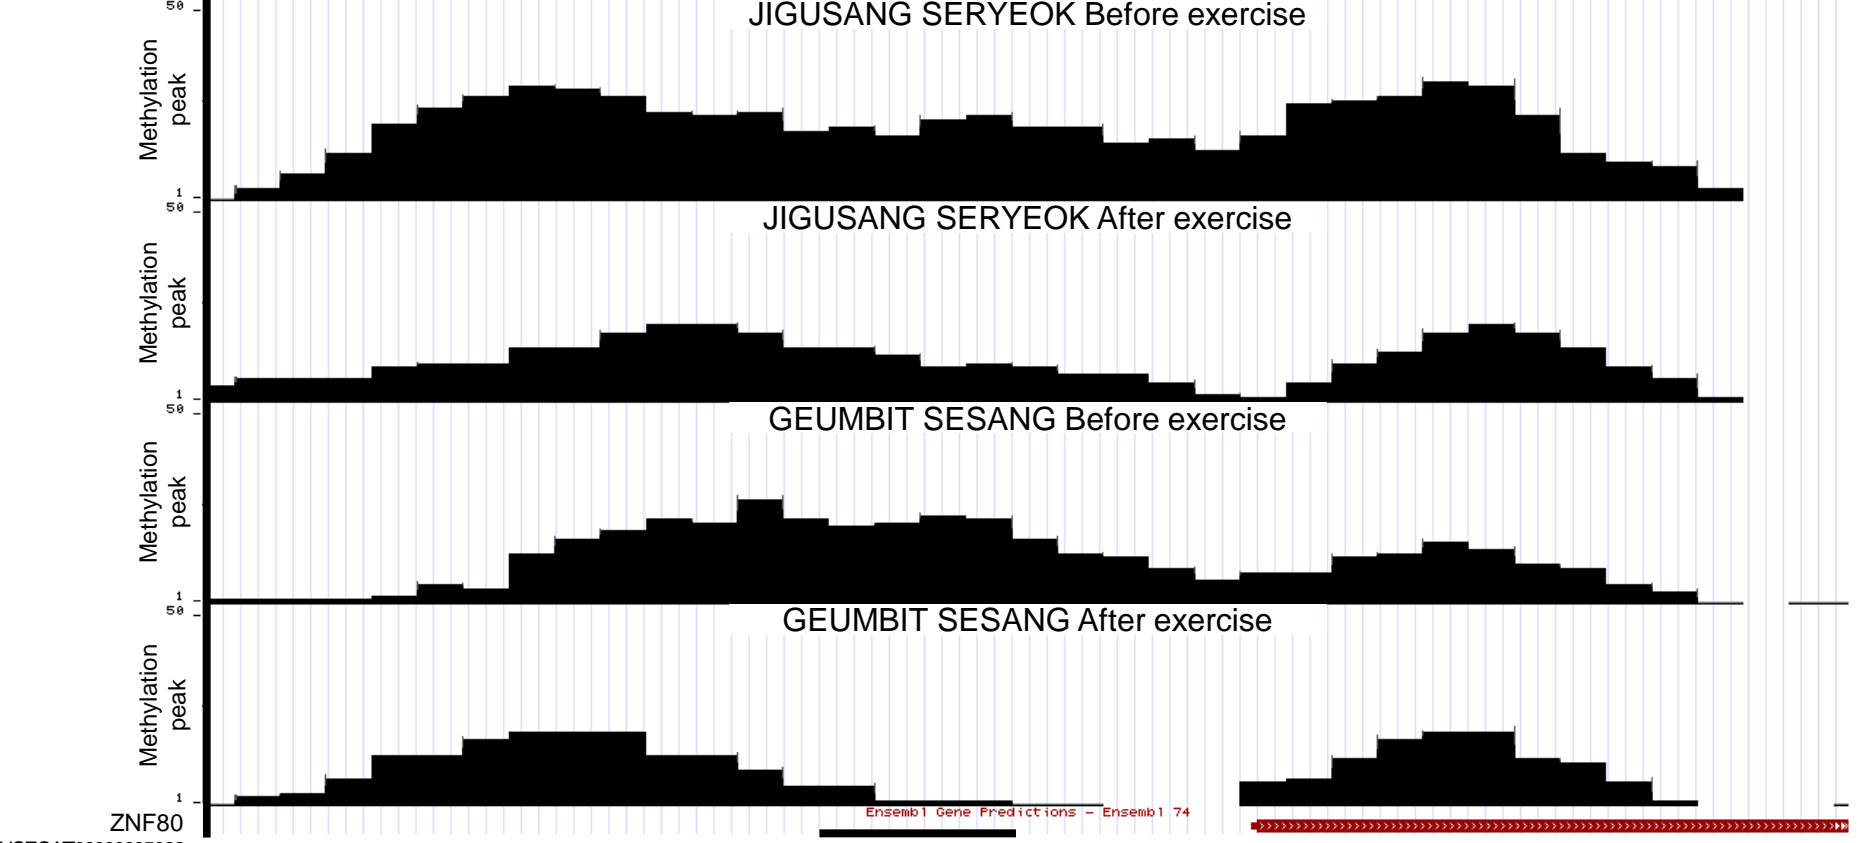

chr19:43785598-43785800  
Amplification region, CpGs: 15

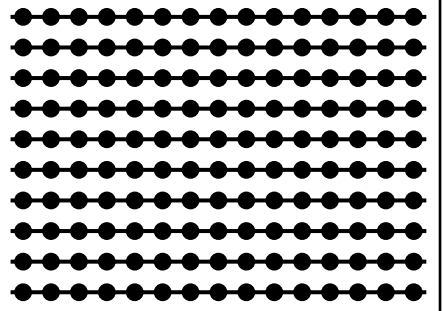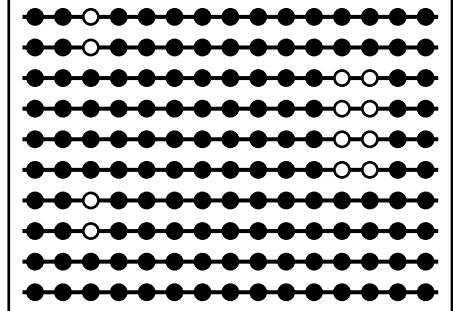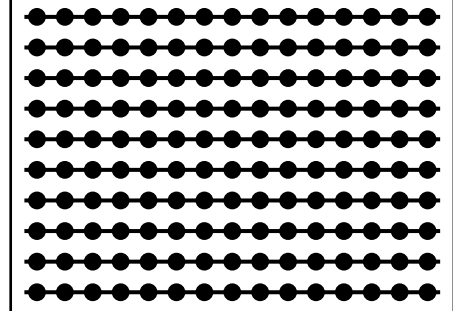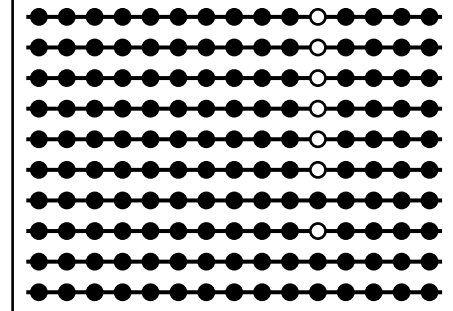

JIGUSANG SERYEOK  
Before exercise

JIGUSANG SERYEOK  
After exercise

GEUMBIT SESANG  
Before exercise

GEUMBIT SESANG  
After exercise

**B**

# Readsdepth of upstream of POU1F1 gene on chr26:3158174-3159302

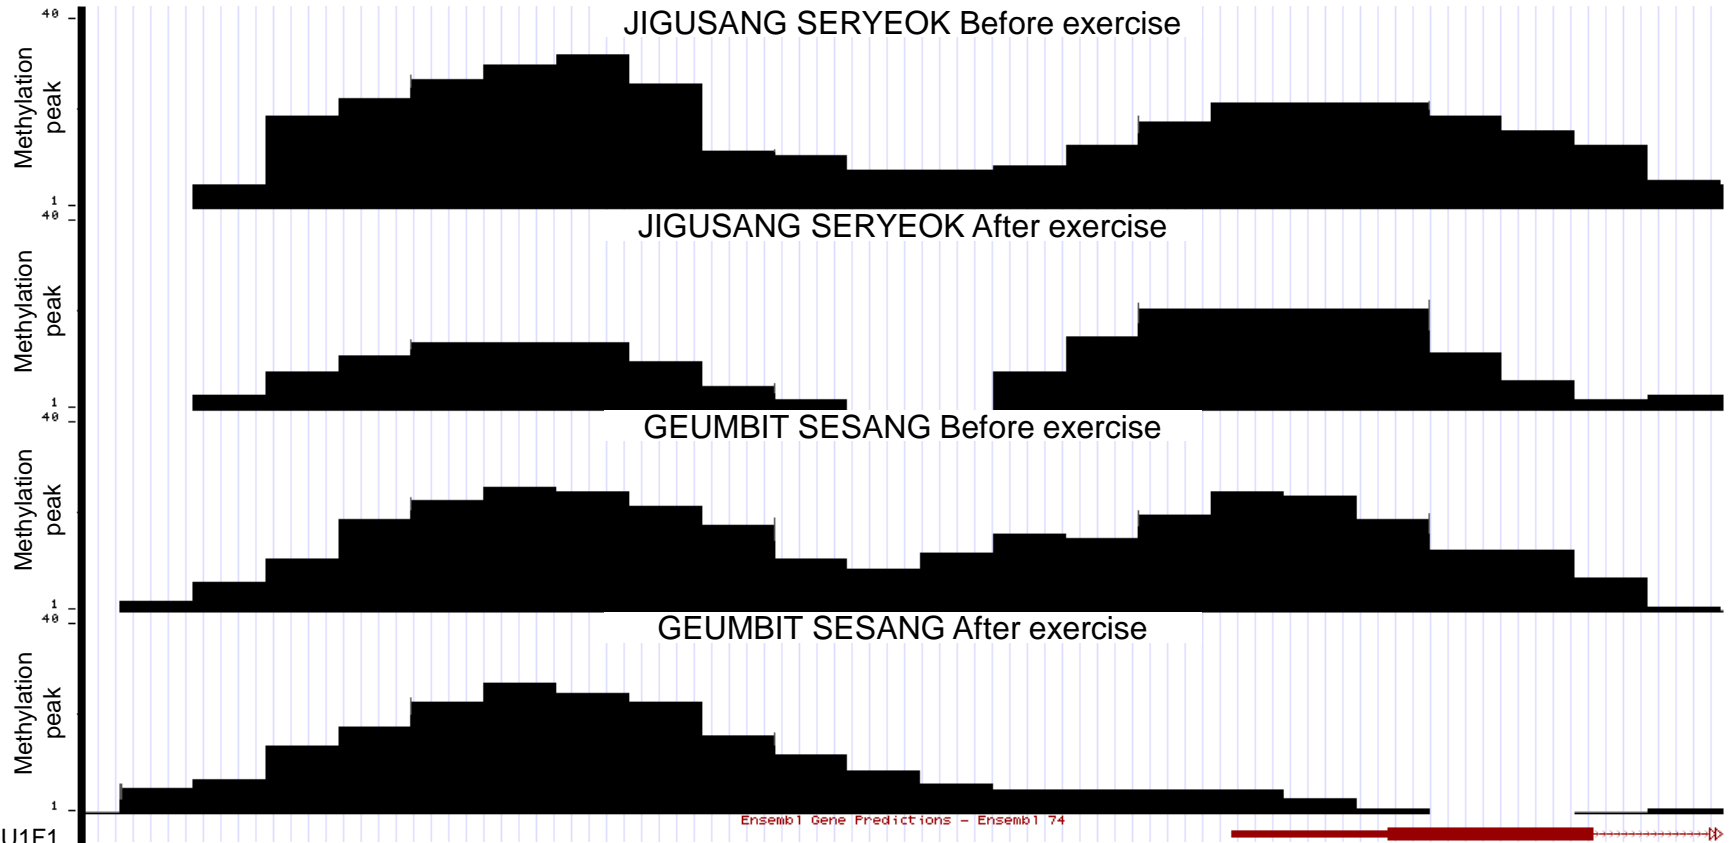

chr26:3158900-3159059  
Amplification region, CpGs: 9

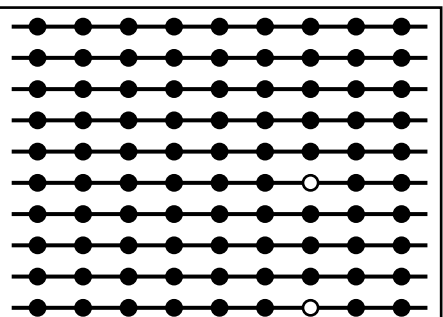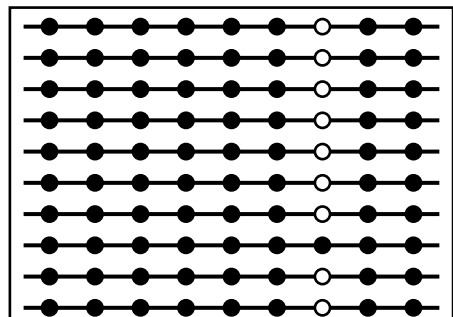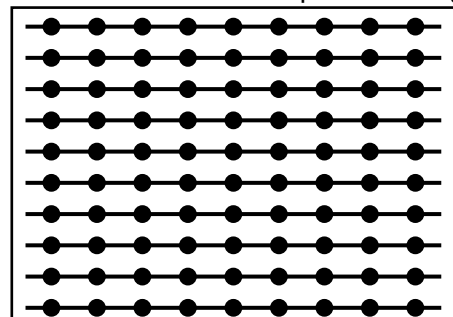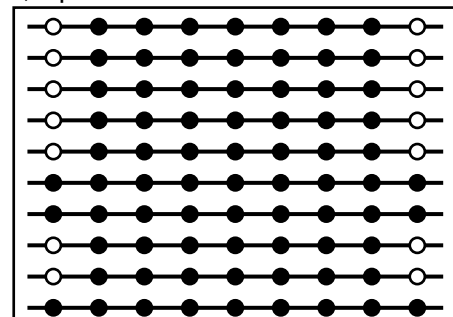

JIGUSANG SERYEOK  
Before exercise

JIGUSANG SERYEOK  
After exercise

GEUMBIT SESANG  
Before exercise

GEUMBIT SESANG  
After exercise

**C**

# Readsdepth of upstream of MFGE8 gene on chr1:94311622-94314194

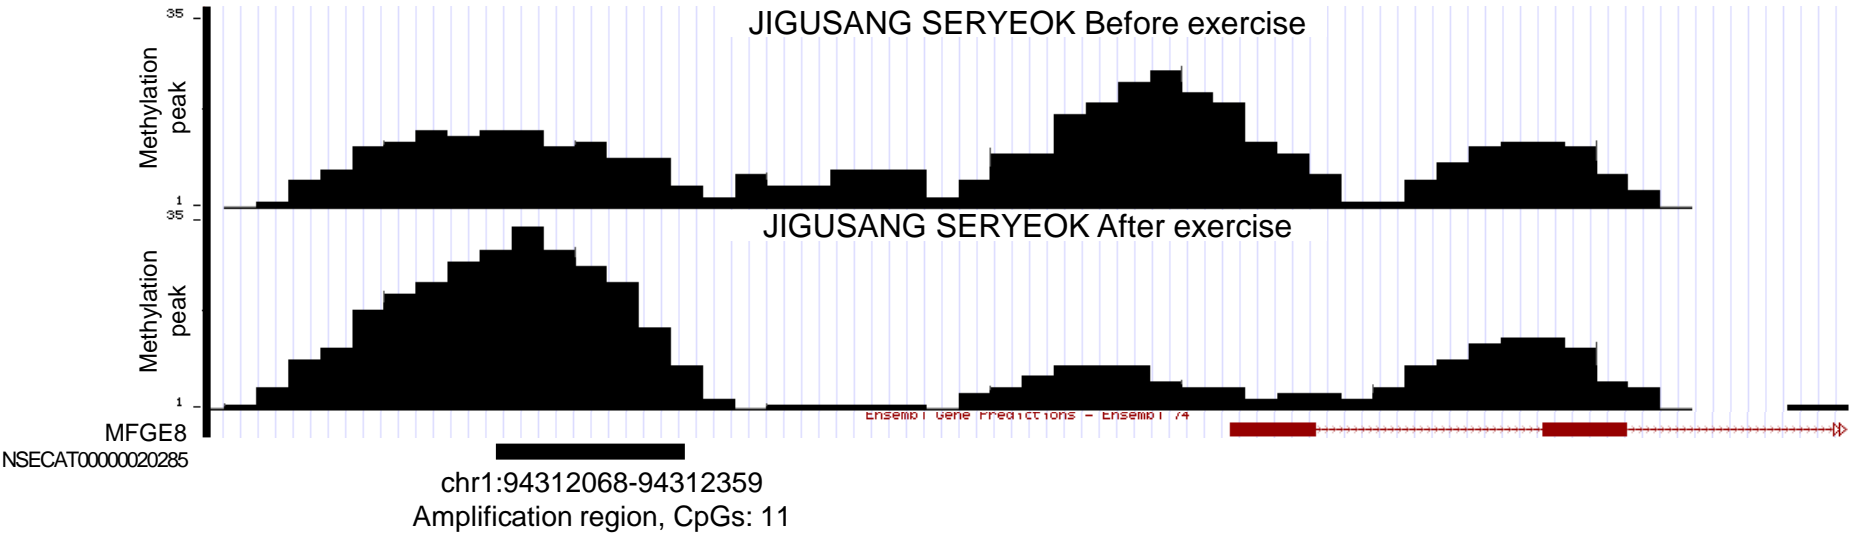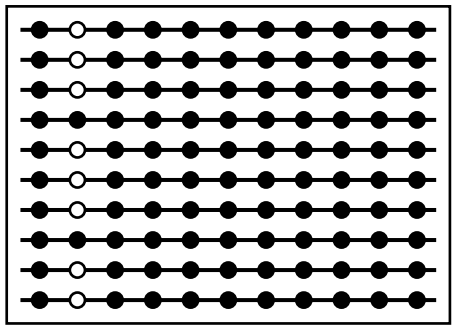

JIGUSANG SERYEOK  
Before exercise

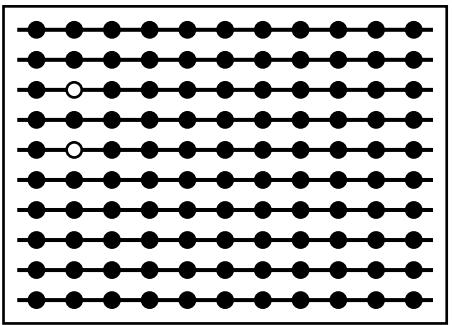

JIGUSANG SERYEOK  
After exercise

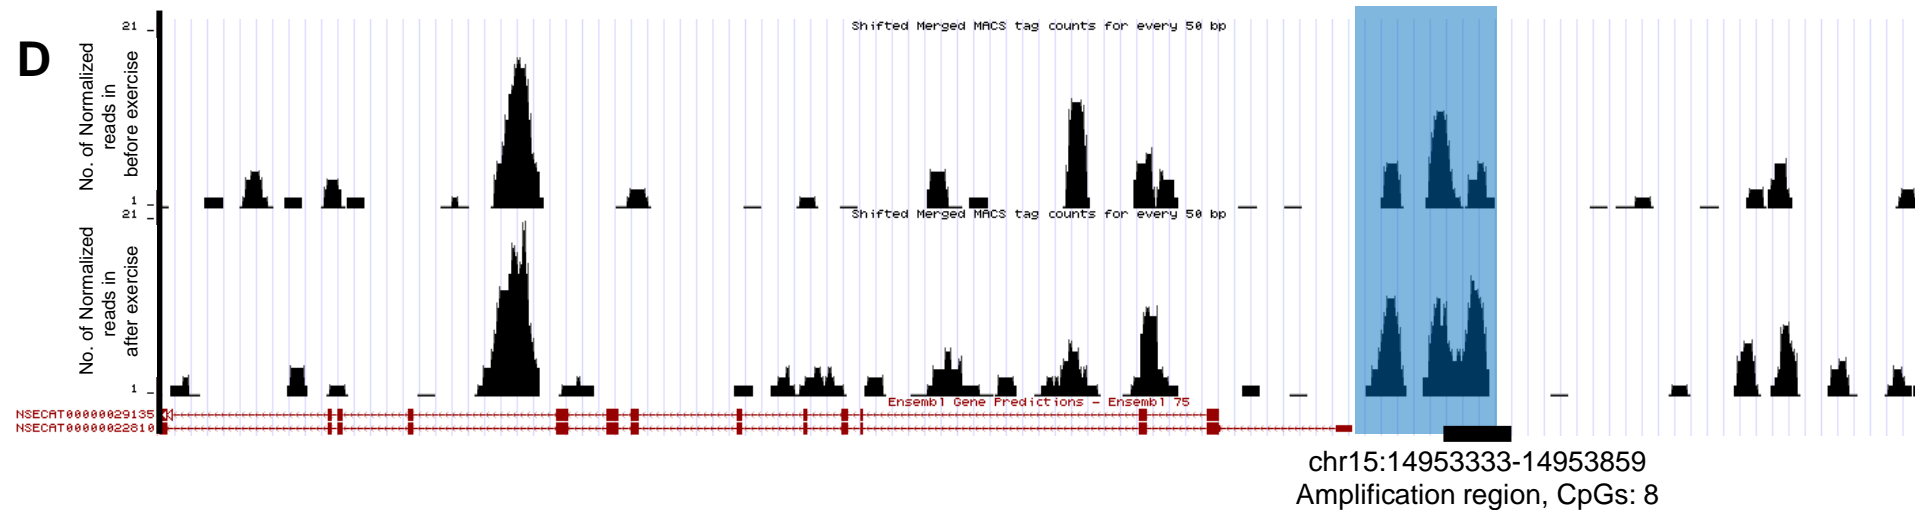

(D) The *ANAPC1* (Anaphase-promoting complex subunit 1) gene is located in chr15:14,841,594-14,951,441. The upstream region is hypermethylated in GEUMBIT SESANG after exercise. GO and KEGG terms include this gene as follows. BP: Cell cycle, BP: Cell adhesion, CC: Cytosol. Relative expression levels of *ANAPC1* in pre- and post-exercise samples. The relative expression level of each gene was evaluated by using qRT-PCR, all samples were amplified in triplicate. Results are presented as mean  $\pm$  SD. A paired Student's *t*-test was performed to obtain *p* values ( $*p < 0.05$ ).

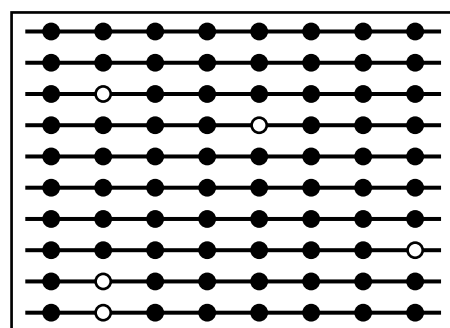

GEUMBIT SESANG  
Before exercise

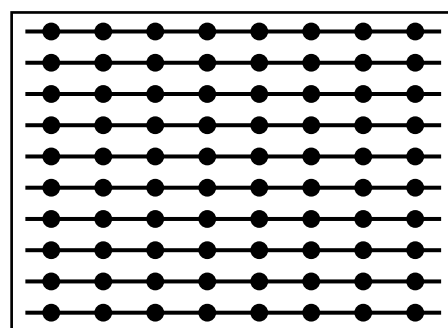

GEUMBIT SESANG  
After exercise

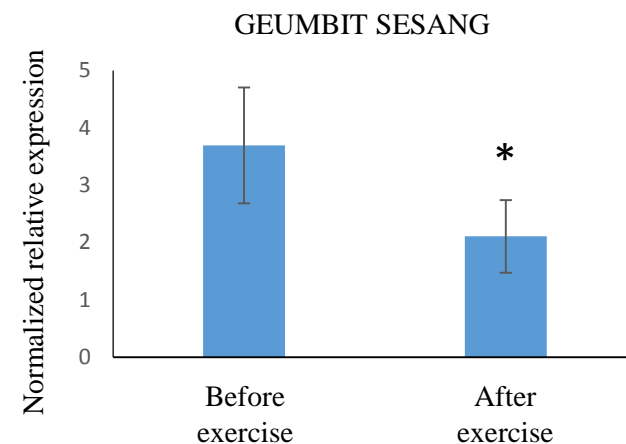

Supplementary Fig. 5.

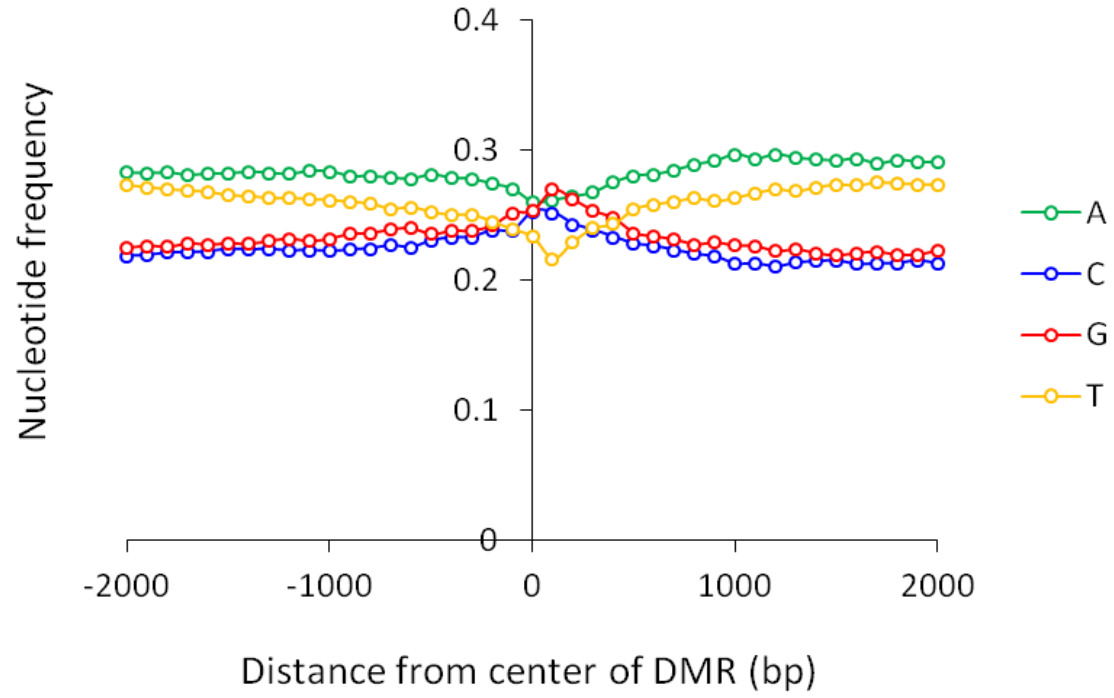



## Significance

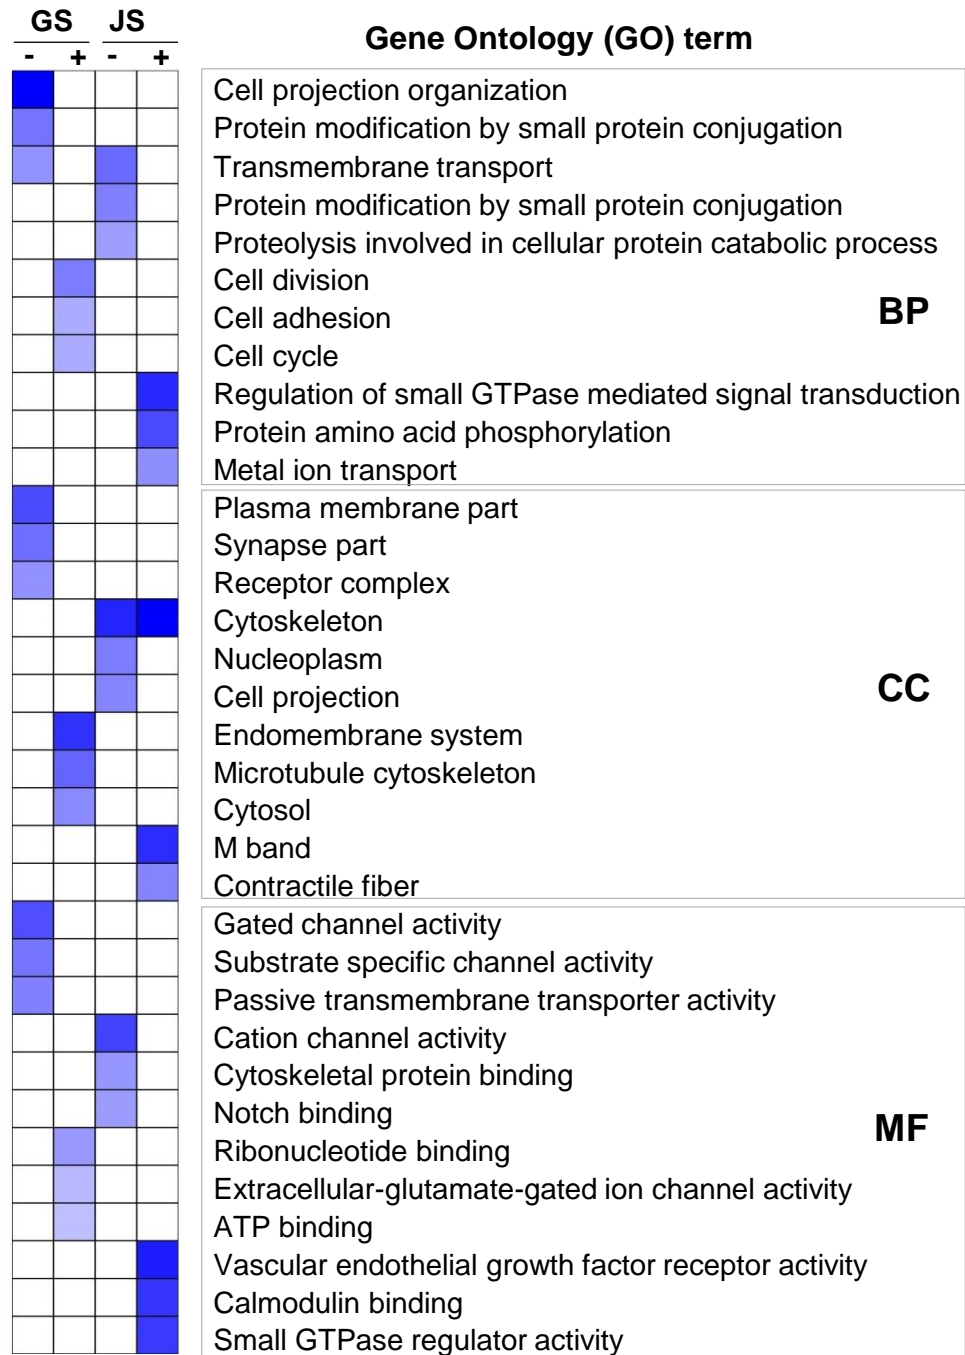

BP

CC

MF

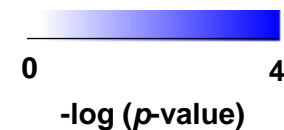

GS : GEUMBIT SESANG

JS : JIGUSANG SERYEOK

- : Hypomethylated region after exercise

+ : Hypermethylated region after exercise

BP : Biological process

CC : Cellular component

MF : Molecular function

Supplementary Fig. 7.

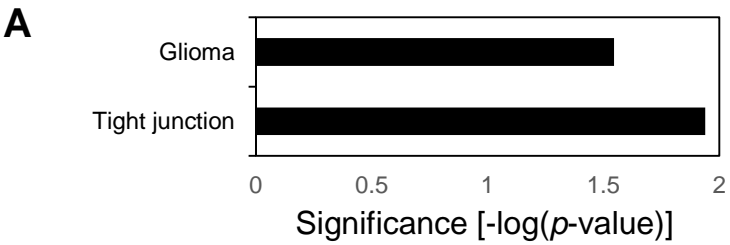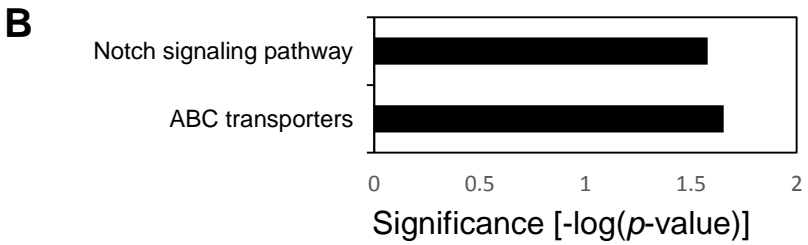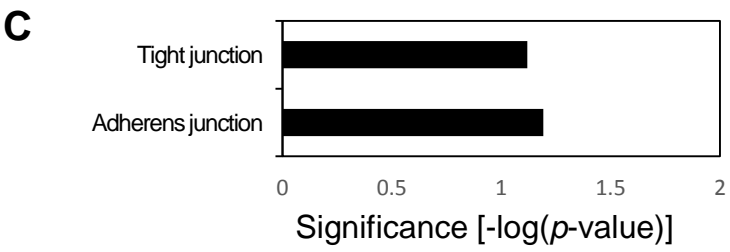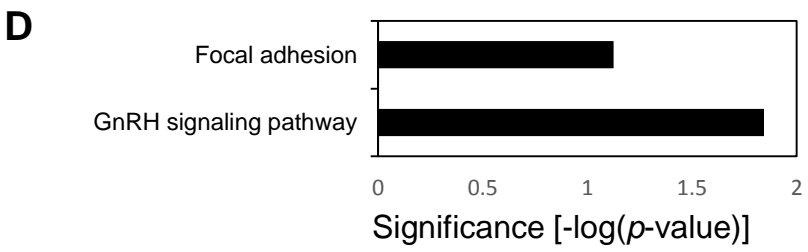

# Supplementary Fig. 8.

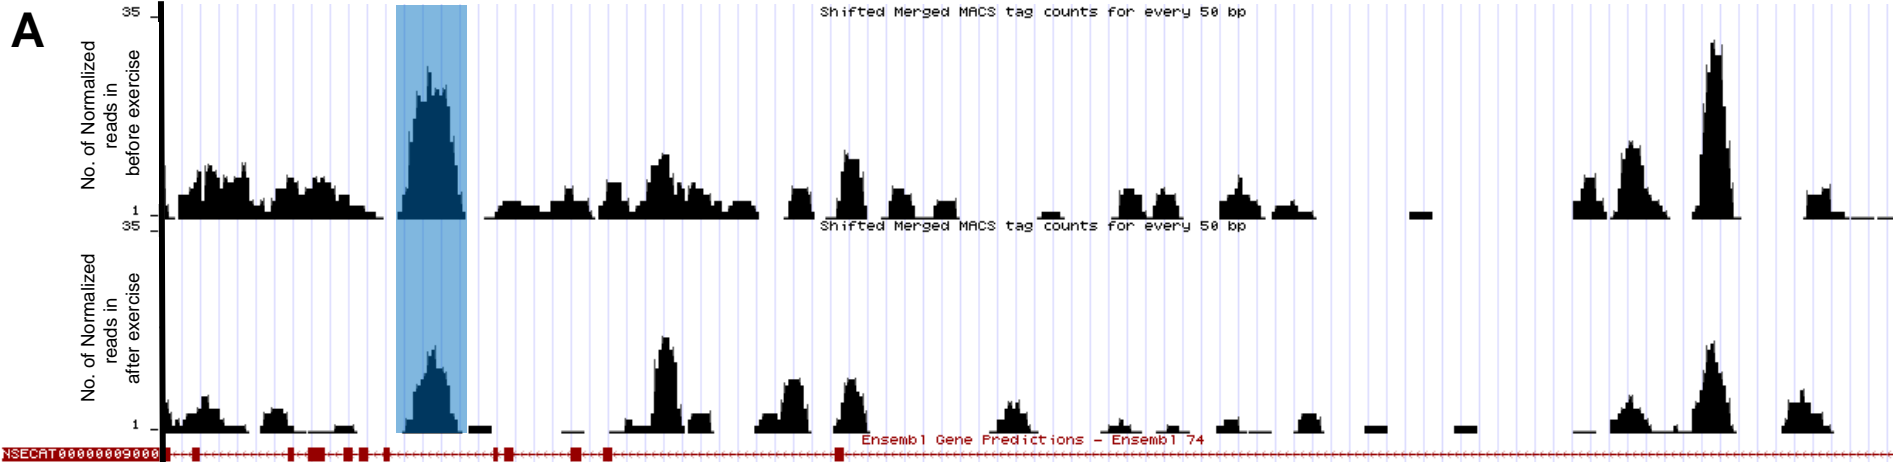

(A) The *AKT1* (RAC-alpha serine/threonine-protein kinase 1) gene is located in chr24:46,109,751-46,133,097. The intronic region is hypomethylated in GEUMBIT SESANG after exercise. GO and KEGG terms include this gene as follows: BP: Protein modification by small protein conjugation, BP: Cell projection organization, KEGG: Focal adhesion.

FOCAL ADHESION

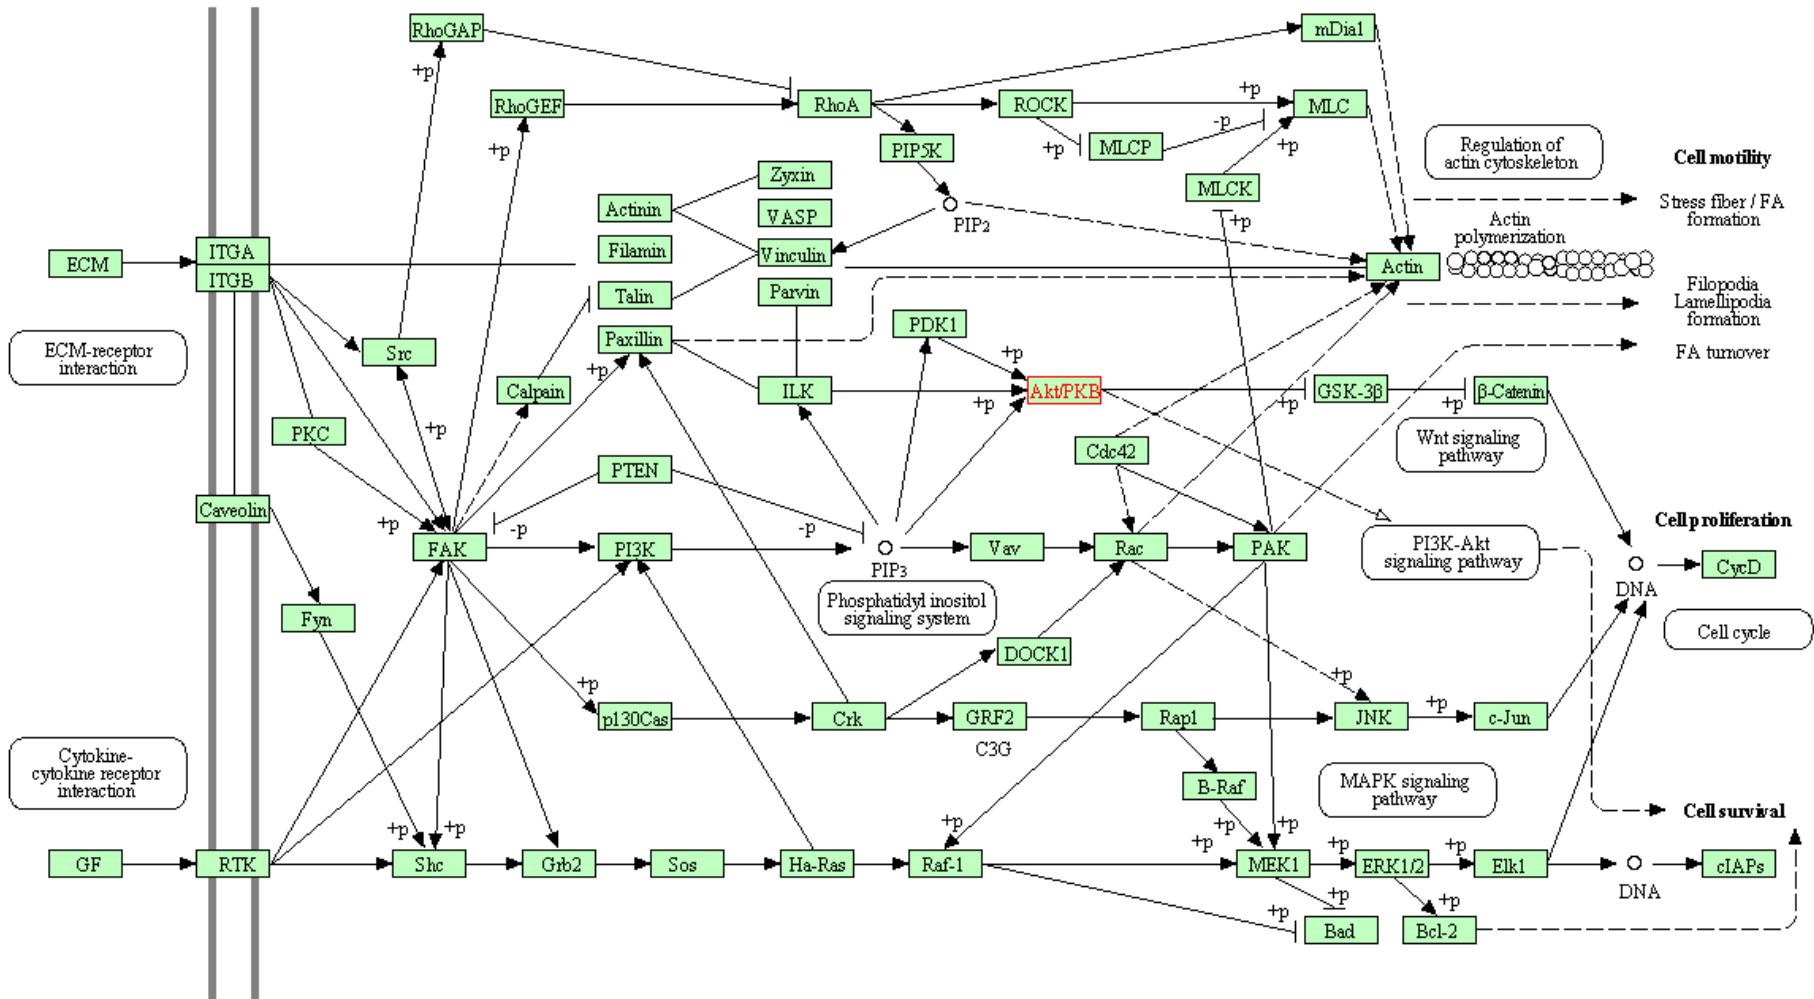

**Supplementary Fig. 8.** Visualization of methylation peaks in exercise-related genes. A total of 23 genes in two horses were selected and the methylation peaks were provided by the UCSC Genome Browser custom tracks.

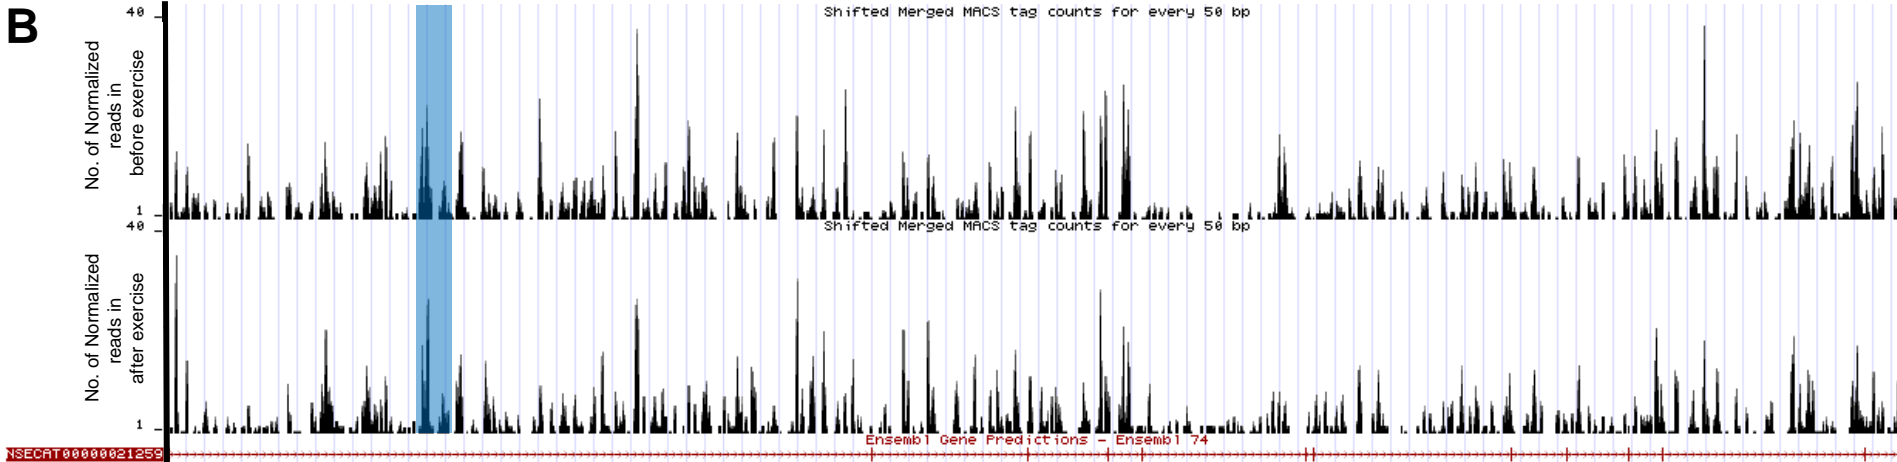

(B) The *AKT3* (RAC-gamma serine/threonine-protein kinase 3) gene is located in chr30:1,173,477-1,487,389. The intron region is hypermethylation in JIGUSANG SERYEOK after exercise. GO and KEGG terms include this gene as follows. BP: Protein amino acid phosphorylation, KEGG: Tight junction, KEGG: Glioma.

# TIGHT JUNCTION

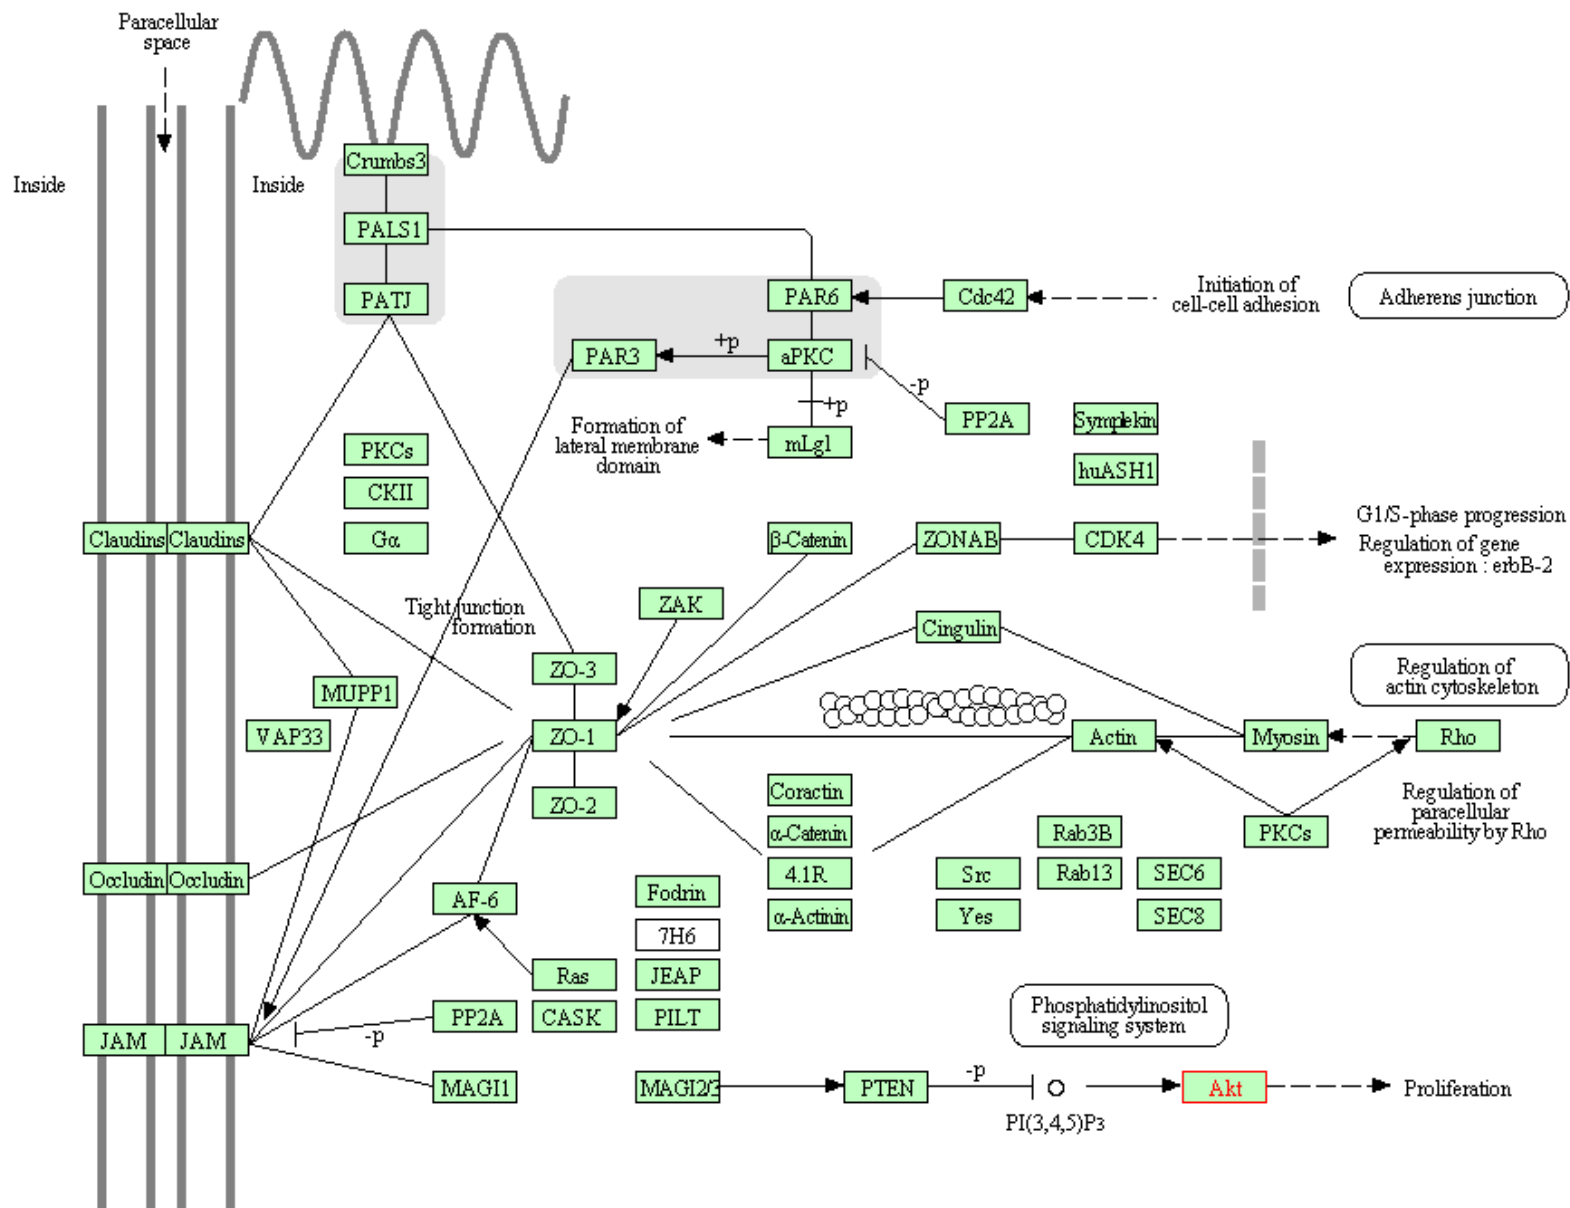

GLIOMA

De Novo pathway

Glial progenitor cell

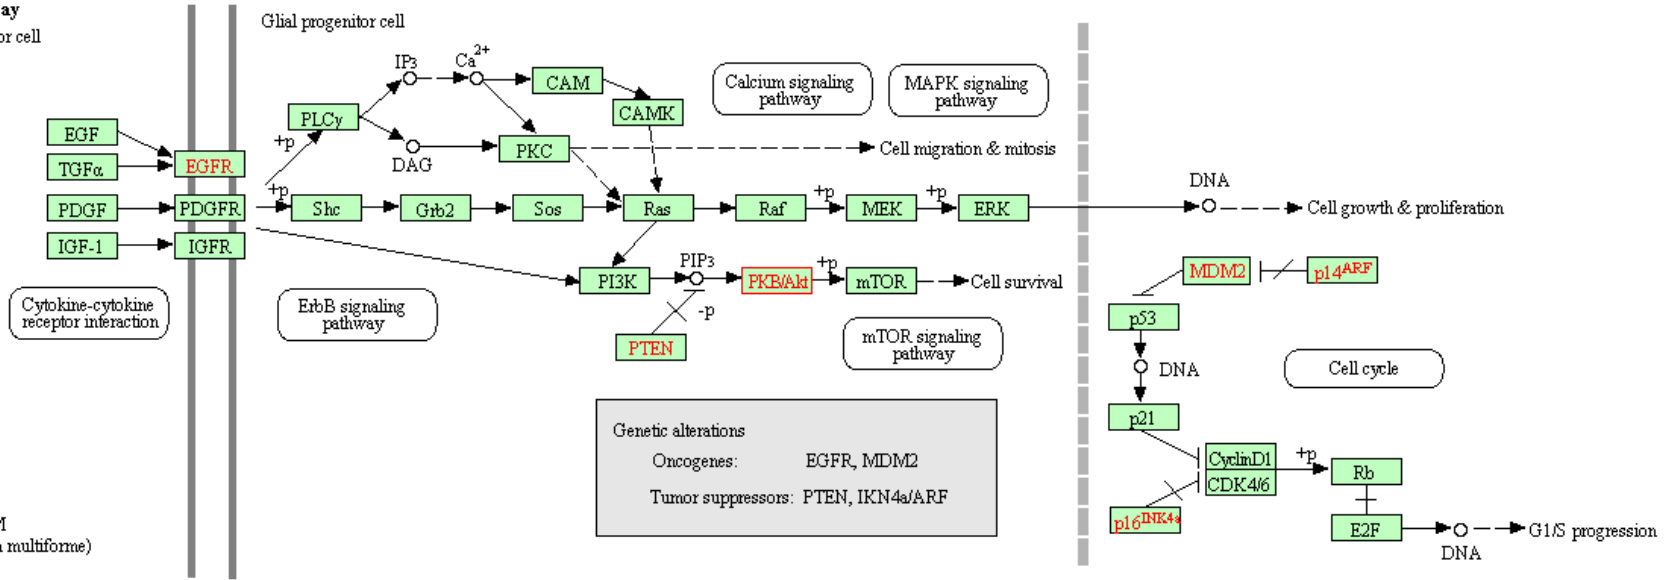

Secondary pathway

Glial progenitor cell

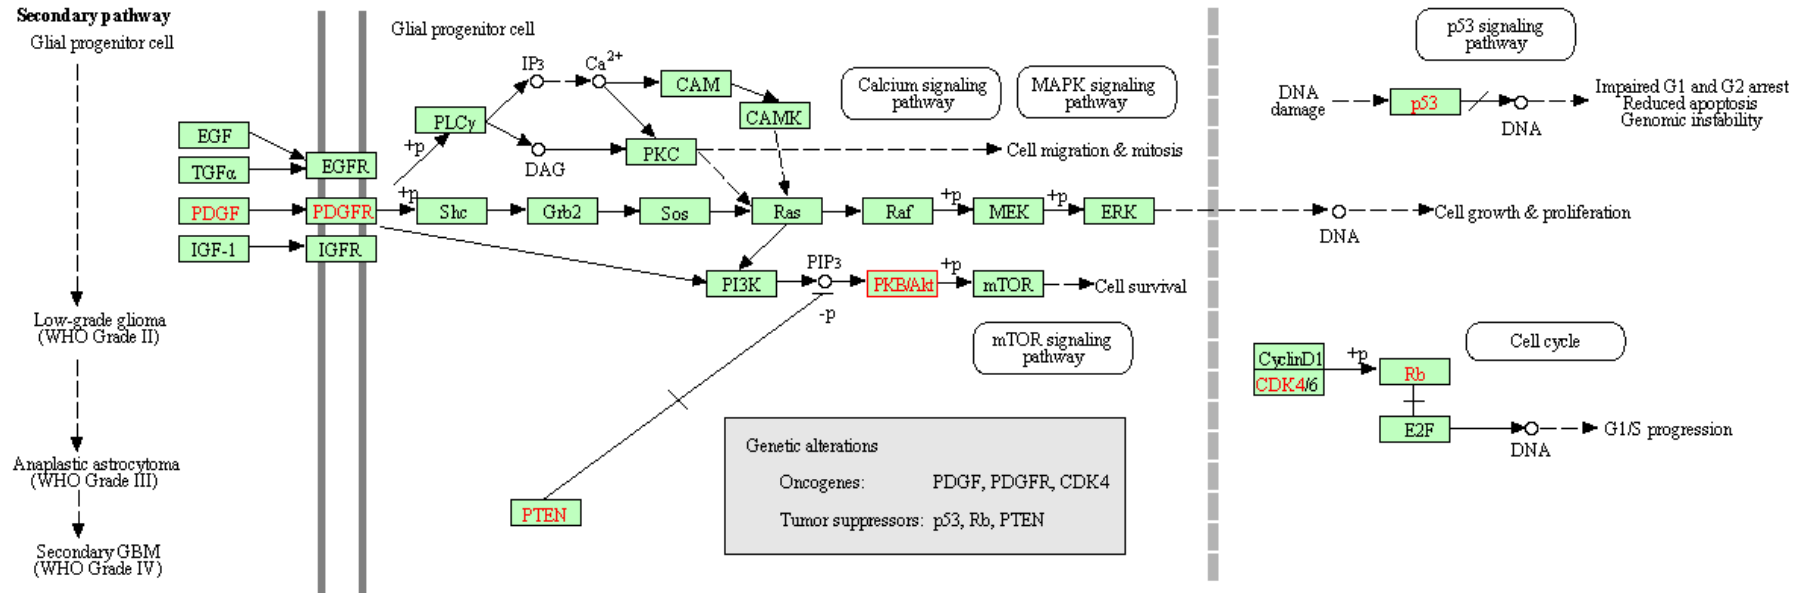

Low-grade glioma (WHO Grade II)

Anaplastic astrocytoma (WHO Grade III)

Secondary GBM (WHO Grade IV)

Primary GBM (Glioblastoma multiforme)

**Supplementary Fig. 8.** Visualization of methylation peaks in exercise-related genes. A total of 23 genes in two horses were selected and the methylation peaks were provided by the UCSC Genome Browser custom tracks.

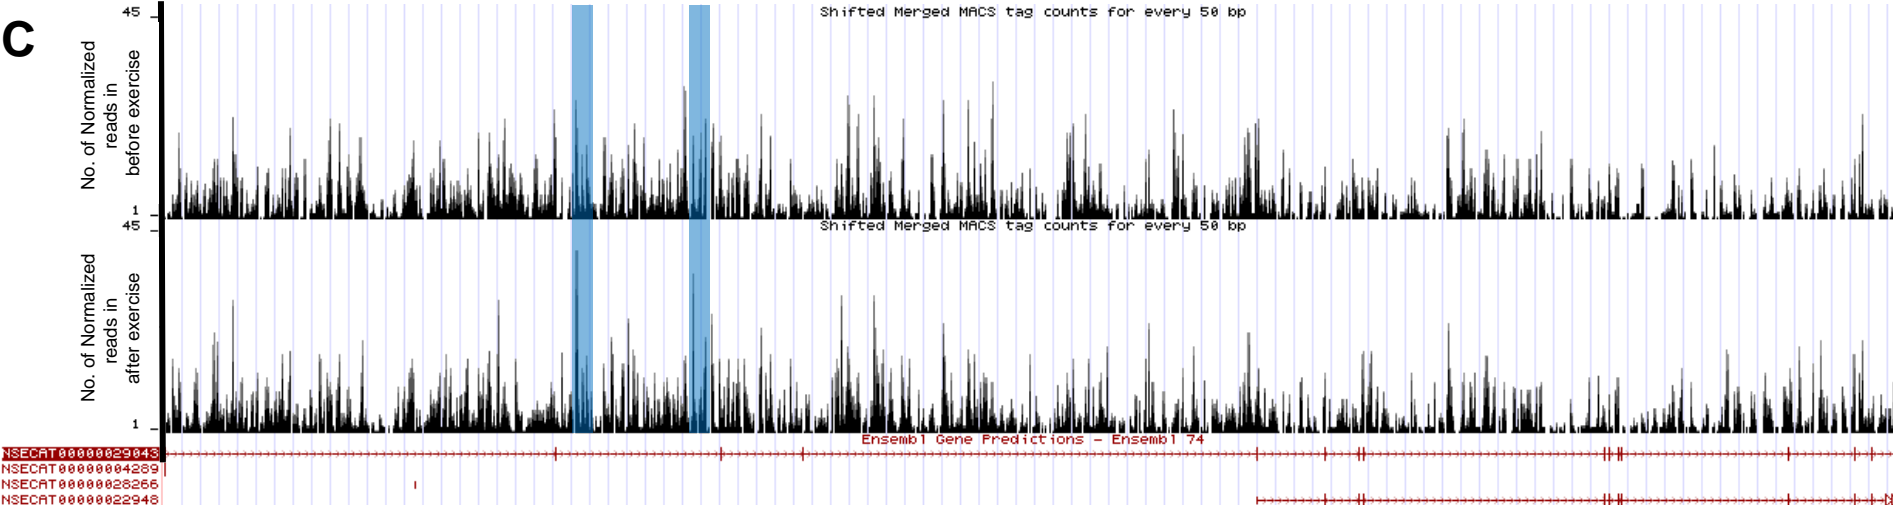

(C) The *GRID1* (Glutamate receptor delta-1) gene is located in chr1:84,021,400-84,686,324. The intron region is hypermethylated in GEUMBIT SESANG after exercise. GO and KEGG terms include this gene as follows. MF: Extracellular-glutamate-gated ion channel activity.



**Supplementary Fig. 8.** Visualization of methylation peaks in exercise-related genes. A total of 23 genes in two horses were selected and the methylation peaks were provided by the UCSC Genome Browser custom tracks.

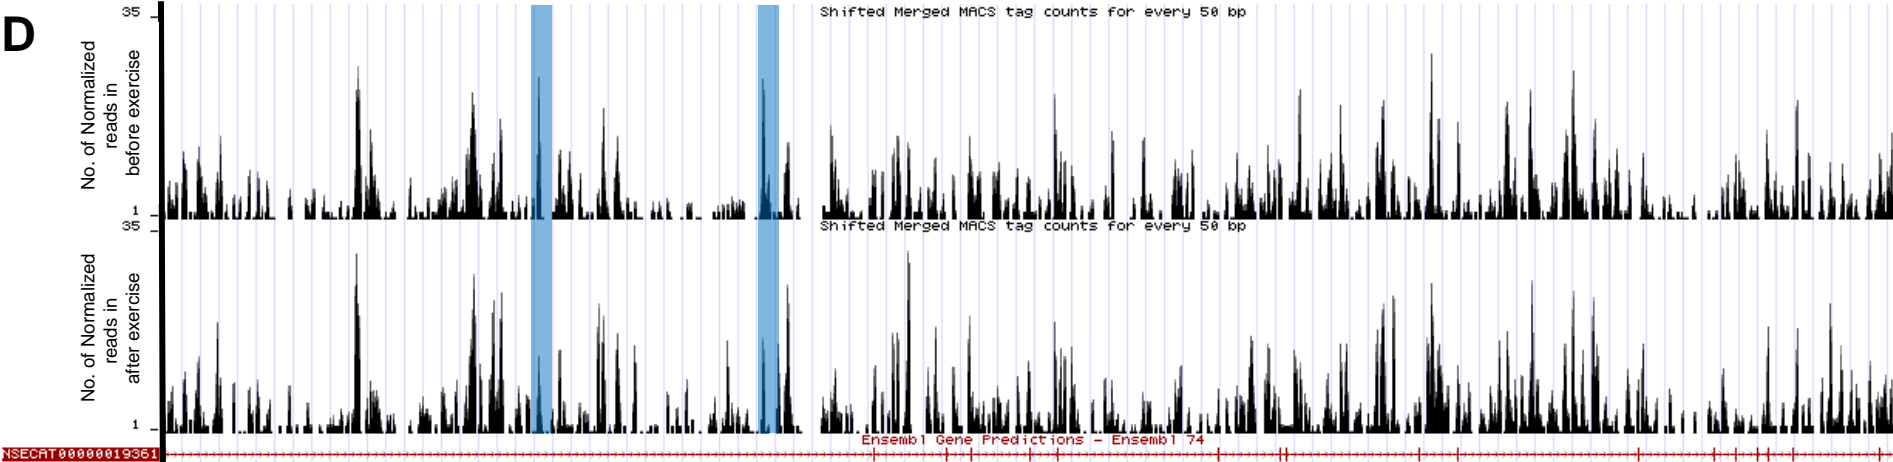

(D) The *GRIK4* (glutamate receptor, ionotropic, kainate 4) gene is located in chr7:28,203,121-28,492,657. The intron region is hypomethylated in GEUMBIT SESANG after exercise. GO and KEGG terms include this gene as follows. CC: Receptor complex, CC: Synapse part, CC: Plasma membrane part, MF: Passive transmembrane transporter activity, MF: Substrate specific channel activity, MF: Gated channel activity.

**Supplementary Fig. 8.** Visualization of methylation peaks in exercise-related genes. A total of 23 genes in two horses were selected and the methylation peaks were provided by the UCSC Genome Browser custom tracks.

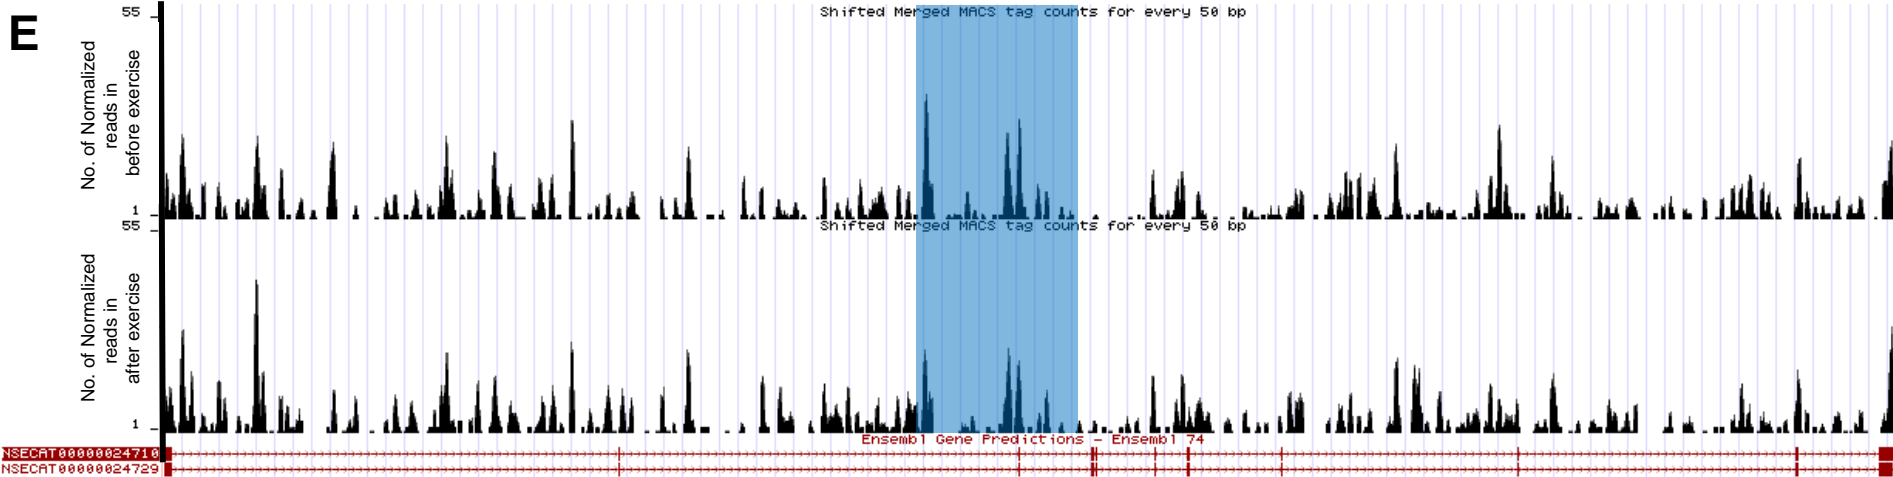

(E) The *GRIN2A* (Glutamate [NMDA] receptor subunit epsilon-1) gene is located in chr13:34,224,912-34,372,429. The intron region is hypomethylated in JIGUSANG SERYEOK after exercise. GO and KEGG terms include this gene as follows. CC: Cell projection, CC: Cytoskeleton, MF: Cation channel activity.

**Supplementary Fig. 8.** Visualization of methylation peaks in exercise-related genes. A total of 23 genes in two horses were selected and the methylation peaks were provided by the UCSC Genome Browser custom tracks.

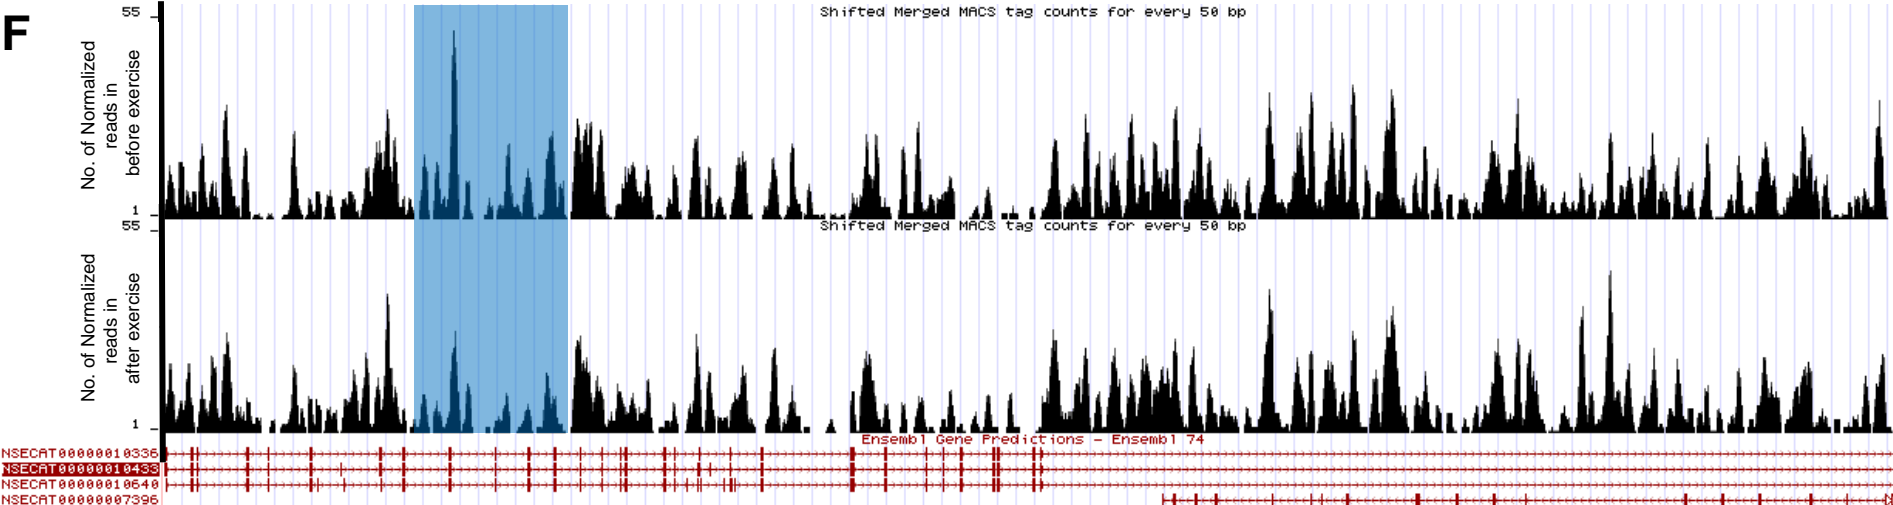

(F) The *ABCC6* (ATP-binding cassette, sub-family C member 9) gene is located in chr13:29,615,992-29,720,039. The intron region is hypomethylated in two horses after exercise. GO and KEGG terms include this gene as follows. BP: Transmembrane transport, KEGG: ABC transporters.

**Supplementary Fig. 8.** Visualization of methylation peaks in exercise-related genes. A total of 23 genes in two horses were selected and the methylation peaks were provided by the UCSC Genome Browser custom tracks.

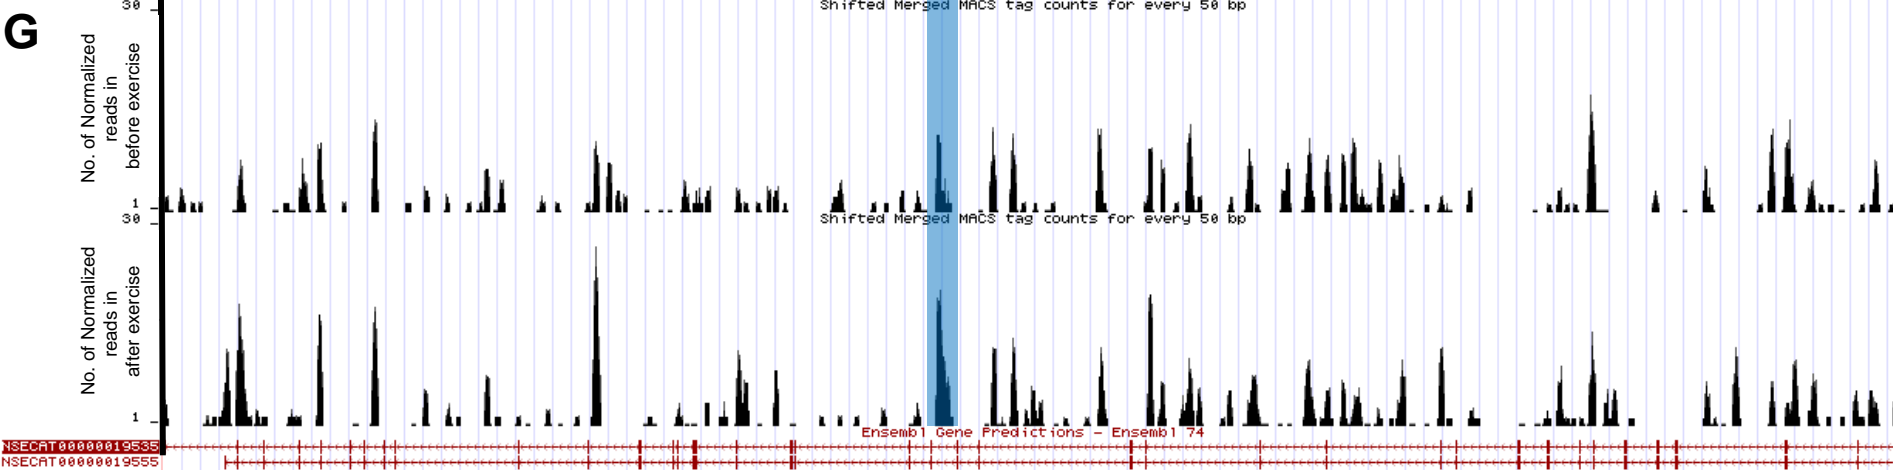

(G) The *ABCC9* (ATP-binding cassette, sub-family C member 9) gene is located in chr6:47,951,001-48,065,838. The intron region is hypermethylated in JIGUSANG SERYEOK after exercise. GO and KEGG terms include this gene as follows. BP: Metal ion transport.

**Supplementary Fig. 8.** Visualization of methylation peaks in exercise-related genes. A total of 23 genes in two horses were selected and the methylation peaks were provided by the UCSC Genome Browser custom tracks.

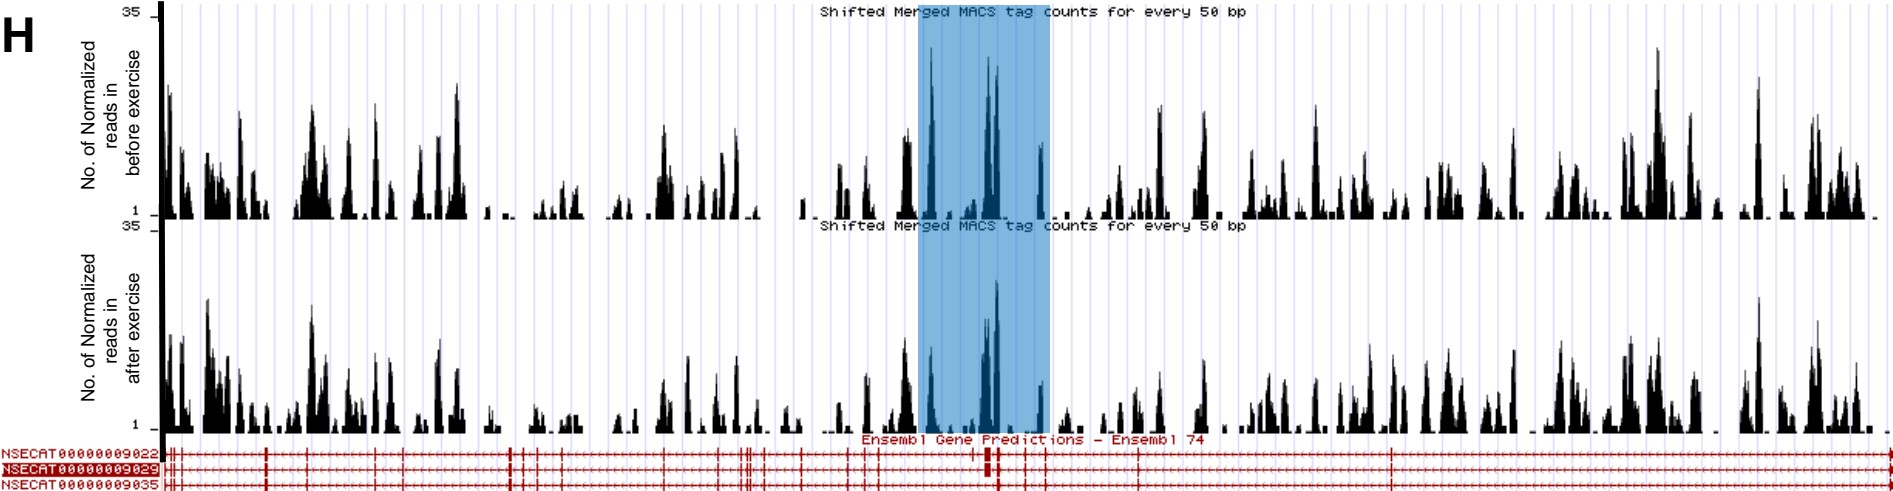

(H) The *UBE4B* (Ubiquitin conjugation factor E4 B) gene is located in chr2:41,135,015-41,256,326. The intron region is hypomethylated in JIGUSANG SERYEOK after exercise. GO and KEGG terms include this gene as follows. BP: Proteolysis involved in cellular protein catabolic process, BP: Protein modification by small protein conjugation.

**Supplementary Fig. 8.** Visualization of methylation peaks in exercise-related genes. A total of 23 genes in two horses were selected and the methylation peaks were provided by the UCSC Genome Browser custom tracks.

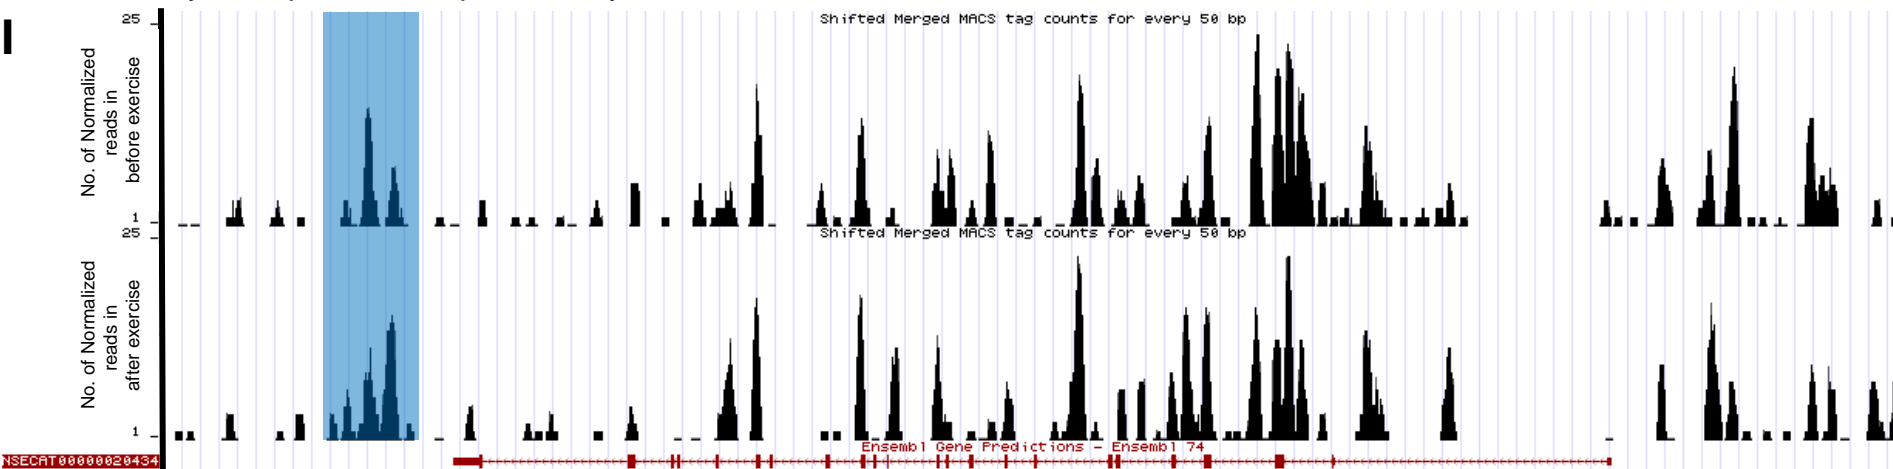

(I) The *PDGFRA* (Platelet-derived growth factor receptor A) gene is located in chr3:78,140,545-78,182,493. The downstream regions is hypermethylated in JIGUSANG SERYEOK after exercise. GO and KEGG terms include this gene as follows. BP: Protein amino acid phosphorylation, MF: Vascular endothelial growth factor receptor activity, KEGG: Glioma.

GLIOMA

De Novo pathway

Glial progenitor cell

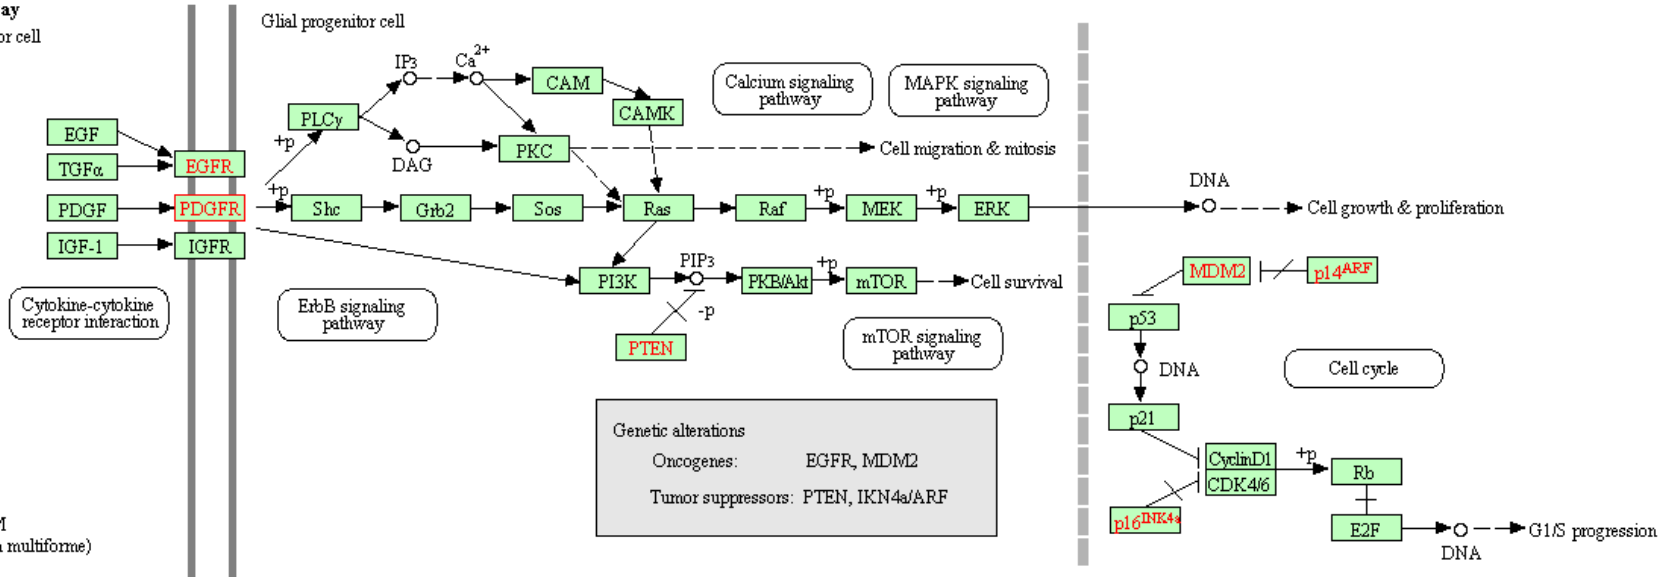

Primary GBM  
(Glioblastoma multiforme)

Secondary pathway

Glial progenitor cell

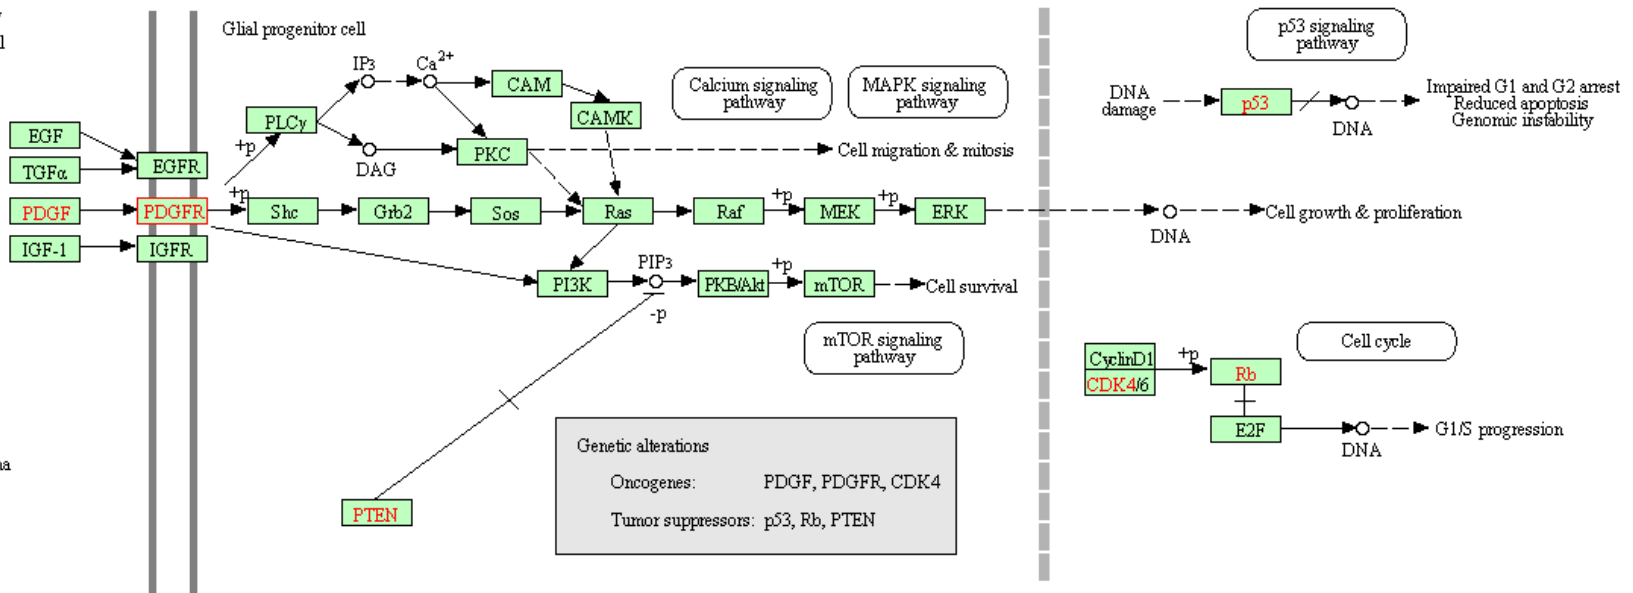

Low-grade glioma  
(WHO Grade II)

Anaplastic astrocytoma  
(WHO Grade III)

Secondary GBM  
(WHO Grade IV)

**Supplementary Fig. 8.** Visualization of methylation peaks in exercise-related genes. A total of 23 genes in two horses were selected and the methylation peaks were provided by the UCSC Genome Browser custom tracks.

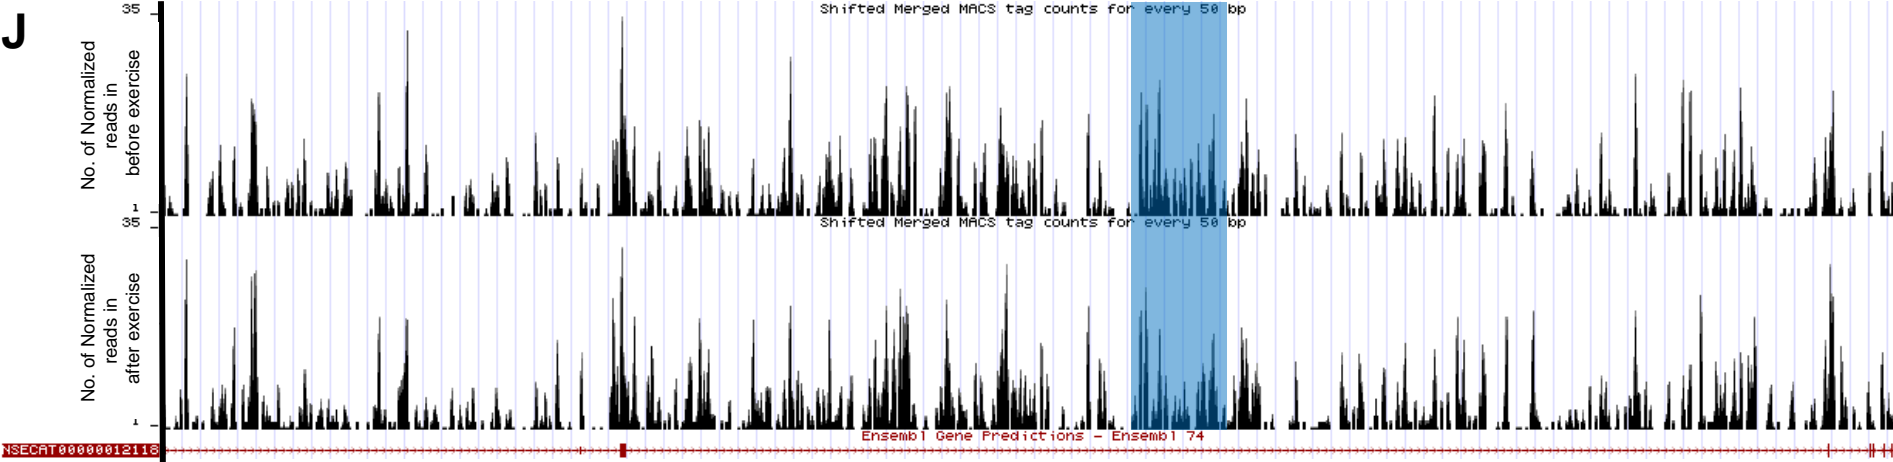

(J) The *KCND3* (Potassium voltage-gated channel subfamily D member 3) gene is located in chr5:56,363,110-56,634,447. The intron region is hypomethylated JIGUSANG SERYEOK after exercise. GO and KEGG terms include this gene as follows. BP: Transmembrane transport, CC: Cell projection, MF: Cation channel activity.



**Supplementary Fig. 8.** Visualization of methylation peaks in exercise-related genes. A total of 23 genes in two horses were selected and the methylation peaks were provided by the UCSC Genome Browser custom tracks.

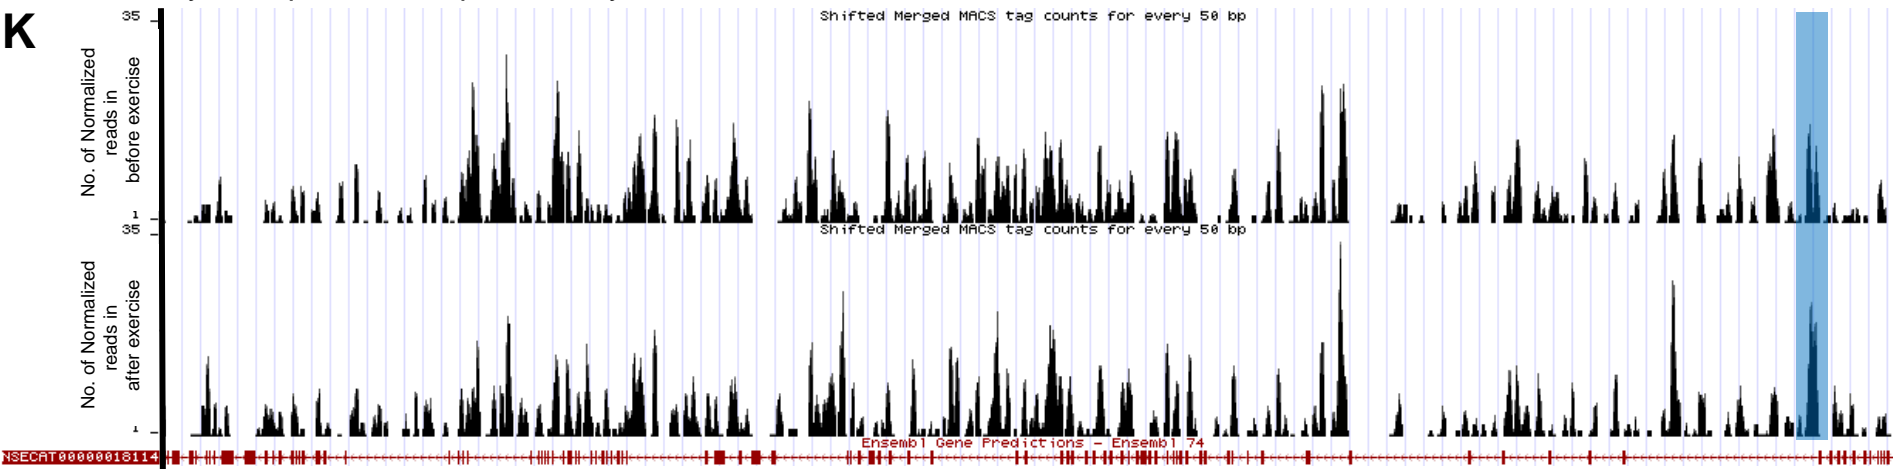

(K) The *OBSCN* (Obscurin) gene is located in chr14:93,349,768-93,500,127. The intron region is hypermethylated in JIGUSANG SERYEOK after exercise. GO and KEGG terms include this gene as follows. BP: Protein amino acid phosphorylation, BP: Regulation of small GTPase mediated signal transduction, CC: Contractile fiber, CC: M band, MF: Small GTPase regulator activity.

**Supplementary Fig. 8.** Visualization of methylation peaks in exercise-related genes. A total of 23 genes in two horses were selected and the methylation peaks were provided by the UCSC Genome Browser custom tracks.

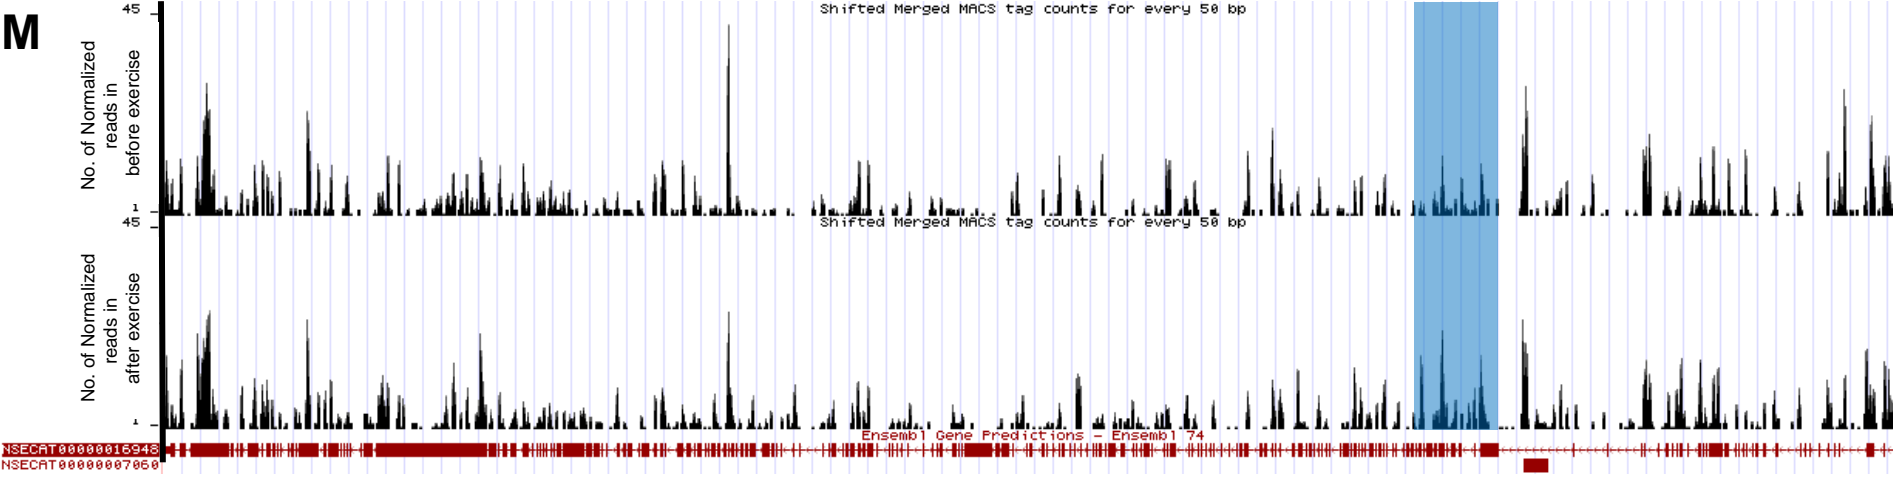

(M) The *TTN* (Titin, also known as Connectin) gene is located in chr18:56,684,352-56,950,669. The exon region is hypermethylated in JIGUSANG SERYEOK after exercise. GO and KEGG terms include this gene as follows. BP: Protein amino acid phosphorylation, BP: Regulation of small GTPase mediated signal transduction, CC: Contractile fiber, CC: M band, CC: Cytoskeleton, MF: Small GTPase regulator activity, MF: Calmodulin binding.

**Supplementary Fig. 8.** Visualization of methylation peaks in exercise-related genes. A total of 23 genes in two horses were selected and the methylation peaks were provided by the UCSC Genome Browser custom tracks.

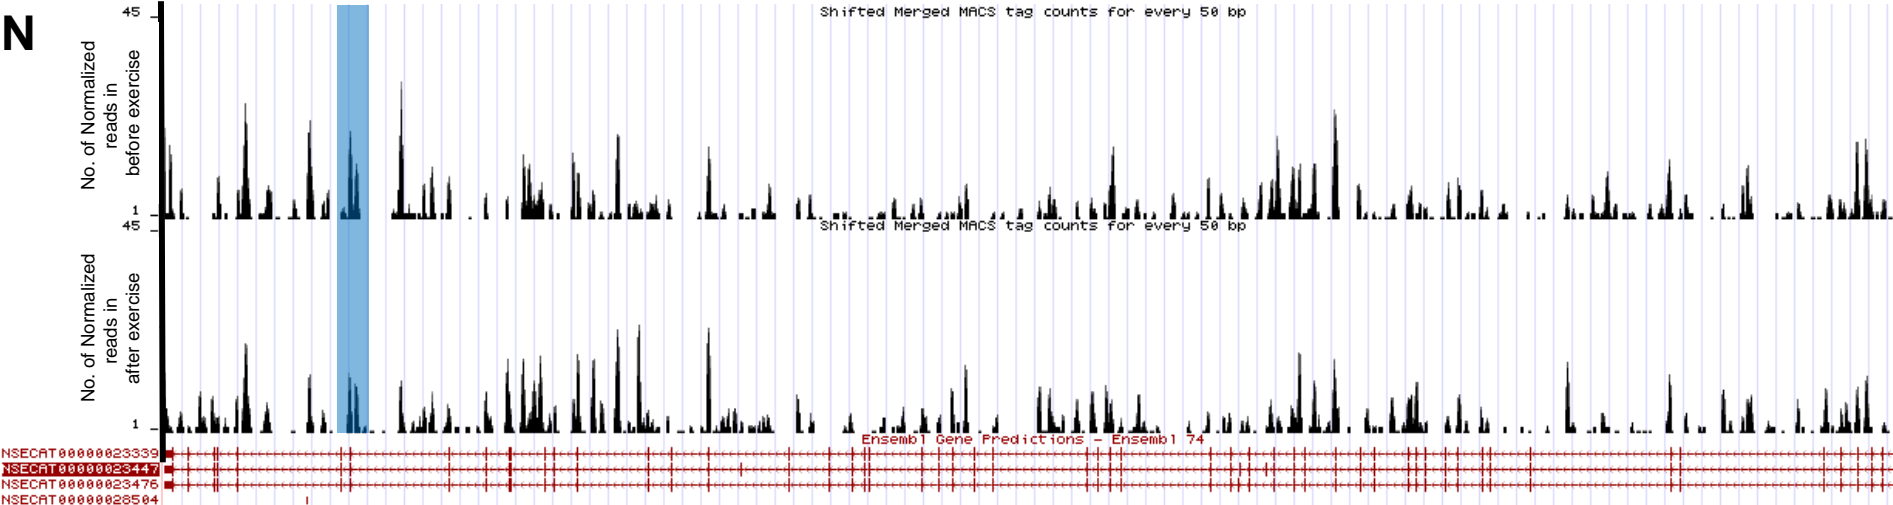

(N) The *TLN2* (Talin 2) gene is located in chr1:129,230,635-129,422,024. The intron region is hypomethylated in JIGUSANG SERYEOK after exercise. GO and KEGG terms include this gene as follows. CC: Cell projection, CC: Cytoskeleton, MF: Cytoskeletal protein binding.

**Supplementary Fig. 8.** Visualization of methylation peaks in exercise-related genes. A total of 23 genes in two horses were selected and the methylation peaks were provided by the UCSC Genome Browser custom tracks.

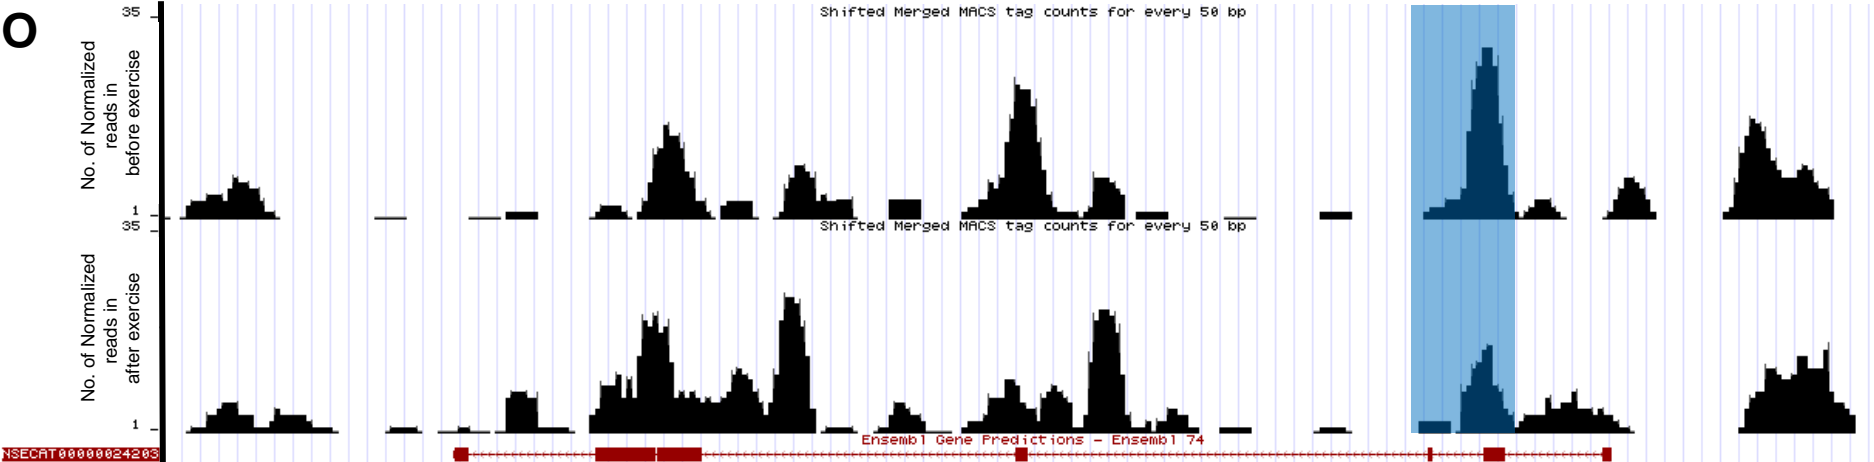

(O) The *CHRNA2* (Neuronal acetylcholine receptor subunit alpha-2) gene is located in chr2:56,053,752-56,064,776. The intron region is hypomethylated in GEUMBIT SESANG after exercise. GO and KEGG terms include this gene as follows. CC: Receptor complex, CC: Synapse part, CC: Plasma membrane part, MF: Passive transmembrane transporter activity, MF: Substrate specific channel activity, MF: Gated channel activity.

**Supplementary Fig. 8.** Visualization of methylation peaks in exercise-related genes. A total of 23 genes in two horses were selected and the methylation peaks were provided by the UCSC Genome Browser custom tracks.

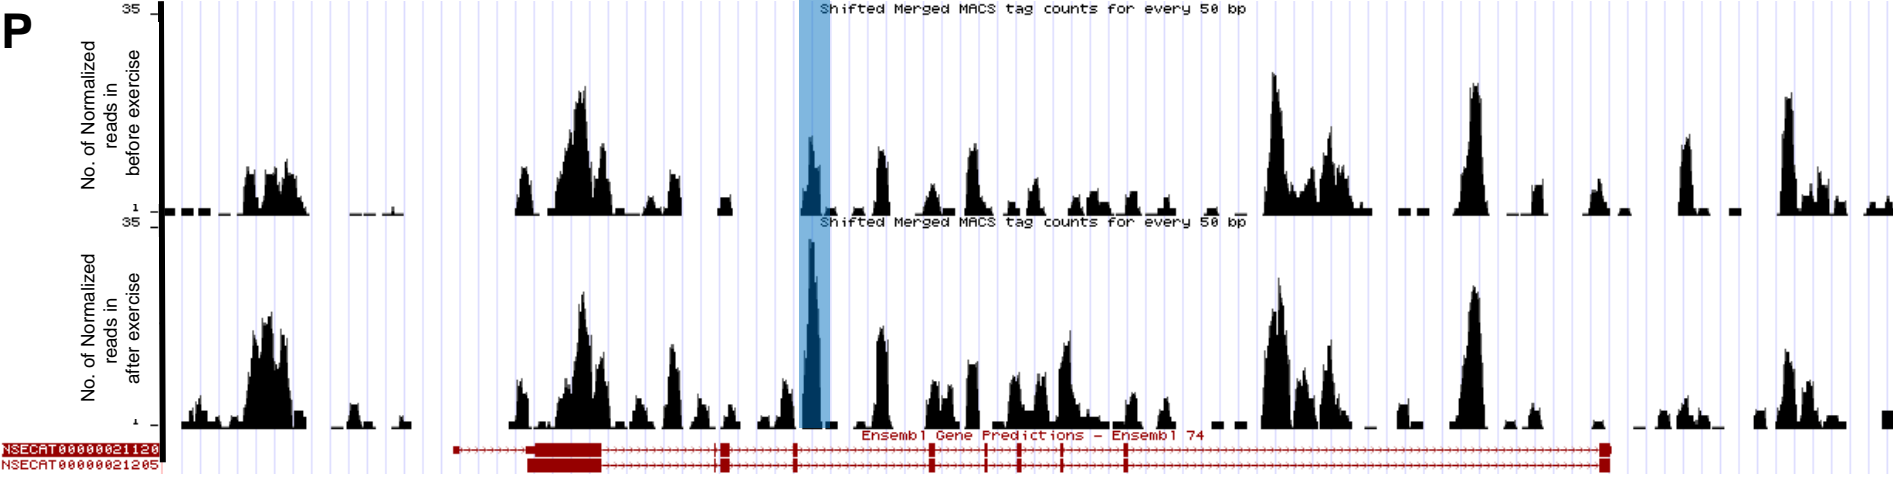

(P) The *PIK3CG* (phosphatidylinositol-4,5-bisphosphate 3-kinase, catalytic subunit gamma) gene is located in chr4:6,928,944-6,959,751. The intron region is hypermethylated in GEUMBIT SESANG after exercise. GO and KEGG terms include this gene as follows. CC: Cytosol, MF: ATP binding, MF: Ribonucleotide binding.

**Supplementary Fig. 8.** Visualization of methylation peaks in exercise-related genes. A total of 23 genes in two horses were selected and the methylation peaks were provided by the UCSC Genome Browser custom tracks.

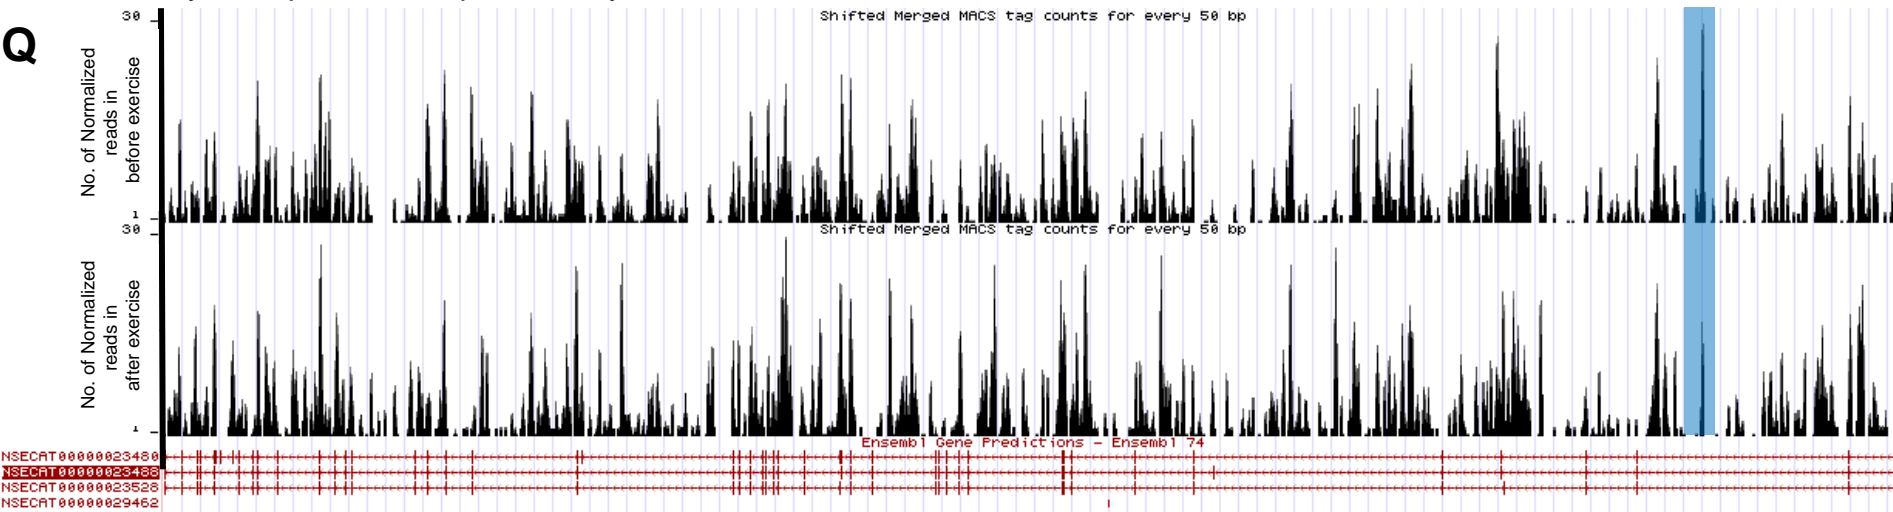

(Q) The *CACNA1C* (Calcium channel, voltage-dependent, L type, alpha 1C subunit) gene is located in chr6:28,057,667-28,285,464. The intron region is hypomethylated in JIGUSANG SERYEOK after exercise. GO and KEGG terms include this gene as follows. BP: Transmembrane transport, CC: Synapse part, CC: Plasma membrane part, MF: Passive transmembrane transporter activity, MF: Substrate specific channel activity, MF: Gated channel activity, KEGG: GnRH signaling pathway.

# GnRH SIGNALING PATHWAY

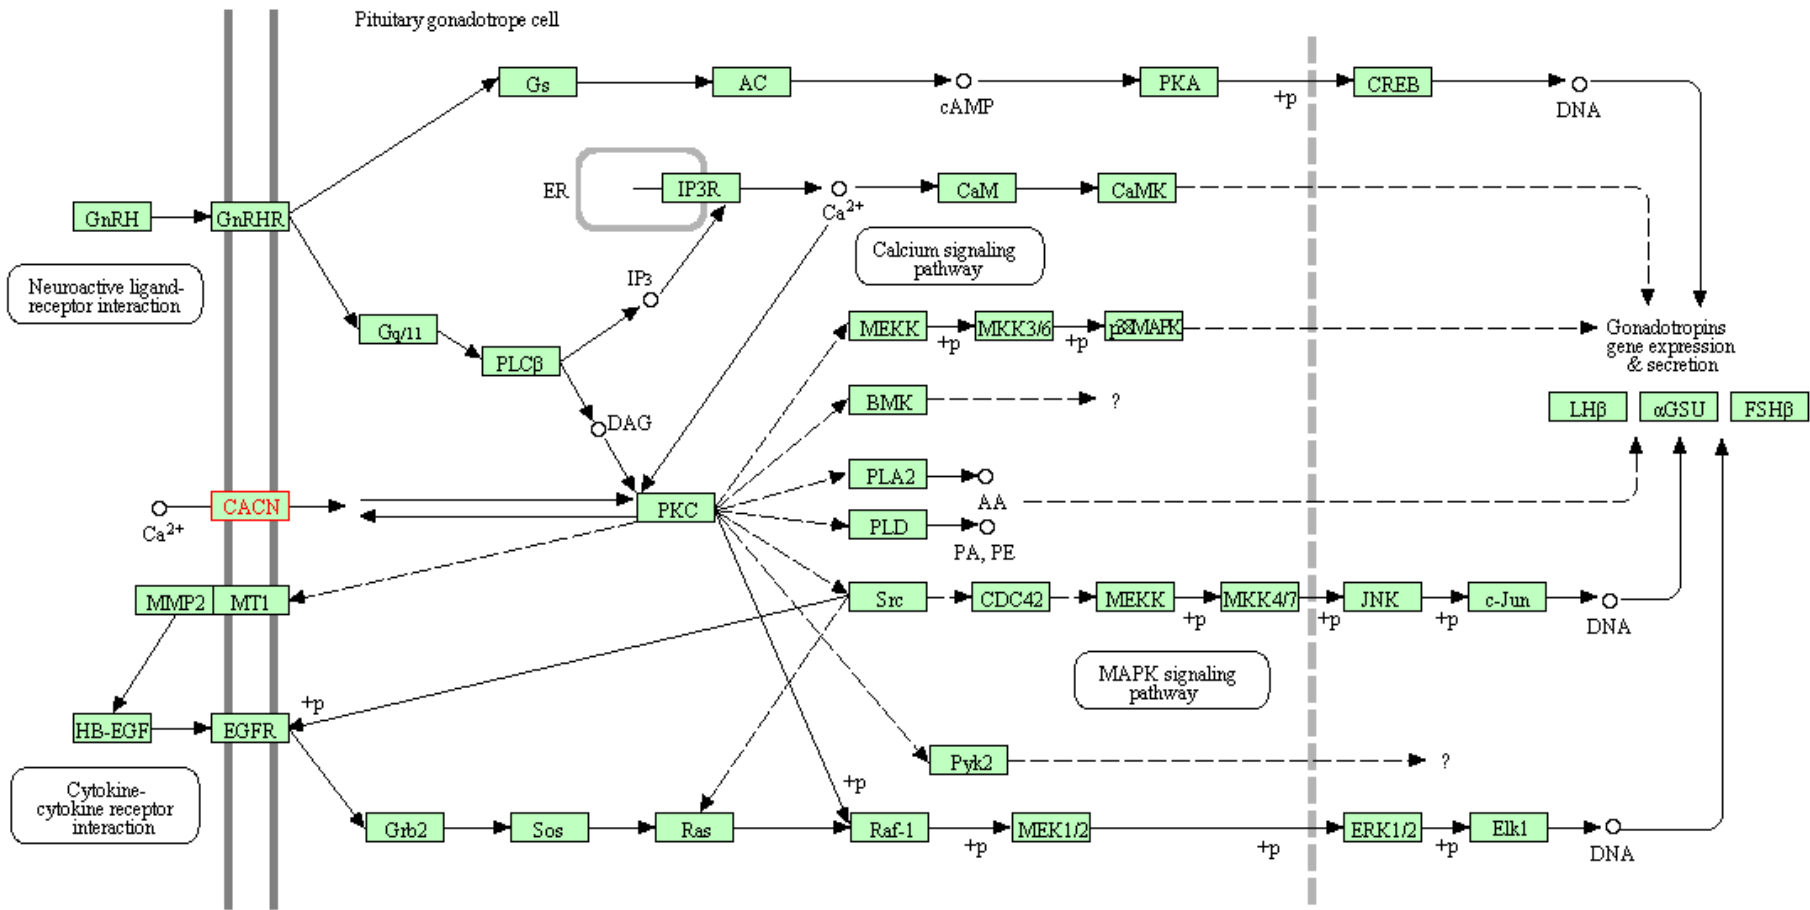

**Supplementary Fig. 8.** Visualization of methylation peaks in exercise-related genes. A total of 23 genes in two horses were selected and the methylation peaks were provided by the UCSC Genome Browser custom tracks.

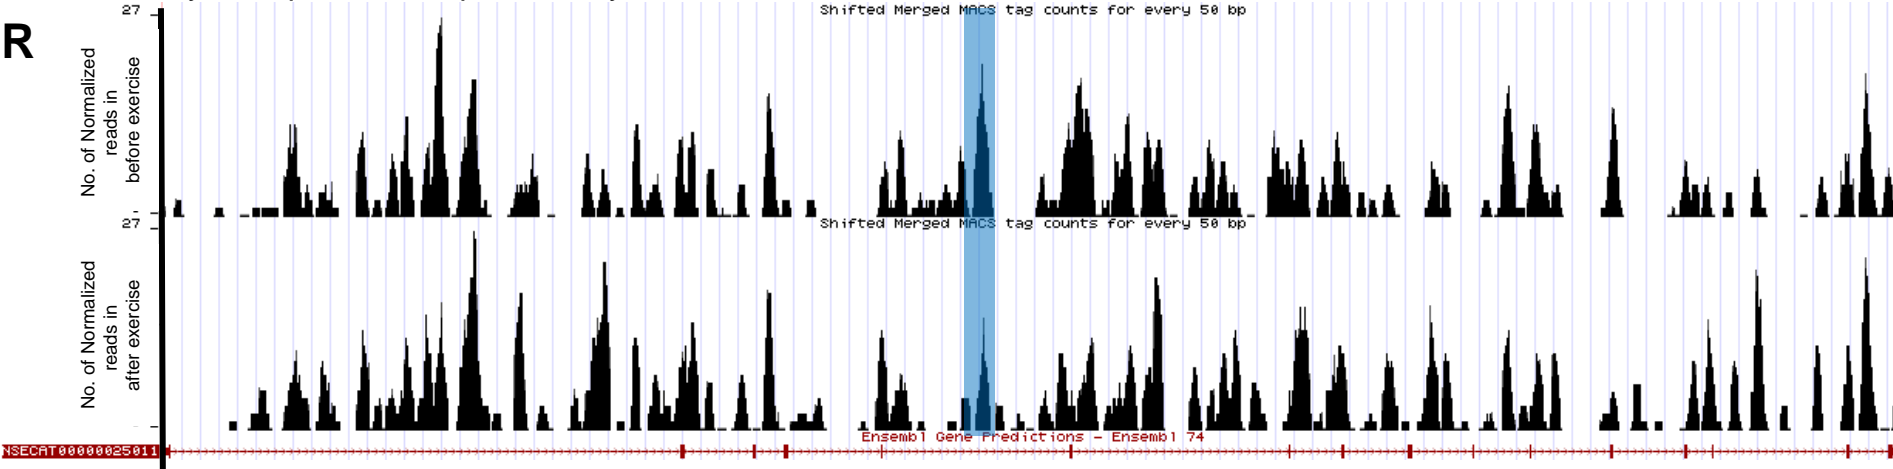

(R) The *SVOP* (SV2-Related Protein) gene is located in chr8:12,056,855-12,120,245. The intron region is hypomethylated in GEUMBIT SESANG after exercise. GO and KEGG terms include this gene as follows. BP: Transmembrane transport, CC: Synapse part, CC: Plasma membrane part.



**Supplementary Fig. 8.** Visualization of methylation peaks in exercise-related genes. A total of 23 genes in two horses were selected and the methylation peaks were provided by the UCSC Genome Browser custom tracks.

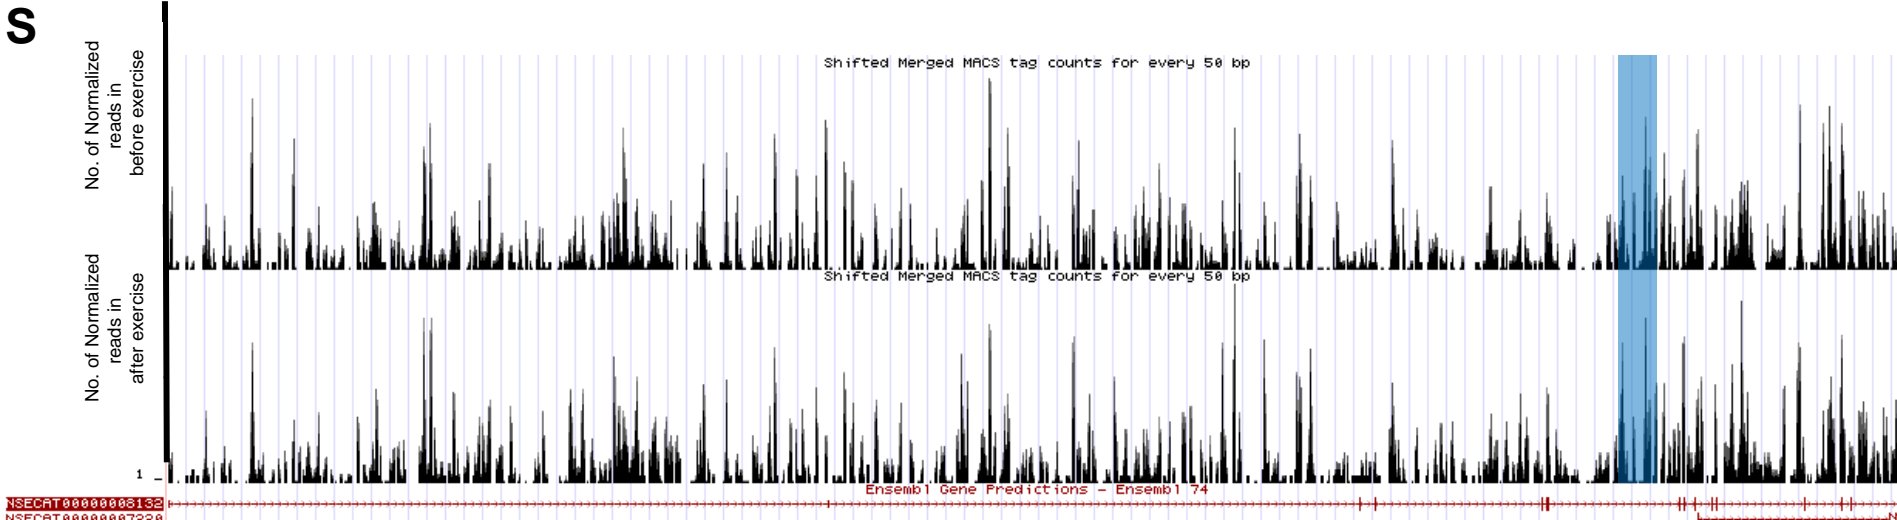

(S) The *PRKCA* (Protein kinase C alpha) gene is located in chr11:13,417,359-13,812,648. The intron region is hypermethylated in JIGUSANG SERYEOK after exercise. GO and KEGG terms include this gene as follows. BP: Protein amino acid phosphorylation, KEGG: Tight junction, KEGG: Glioma.

# TIGHT JUNCTION

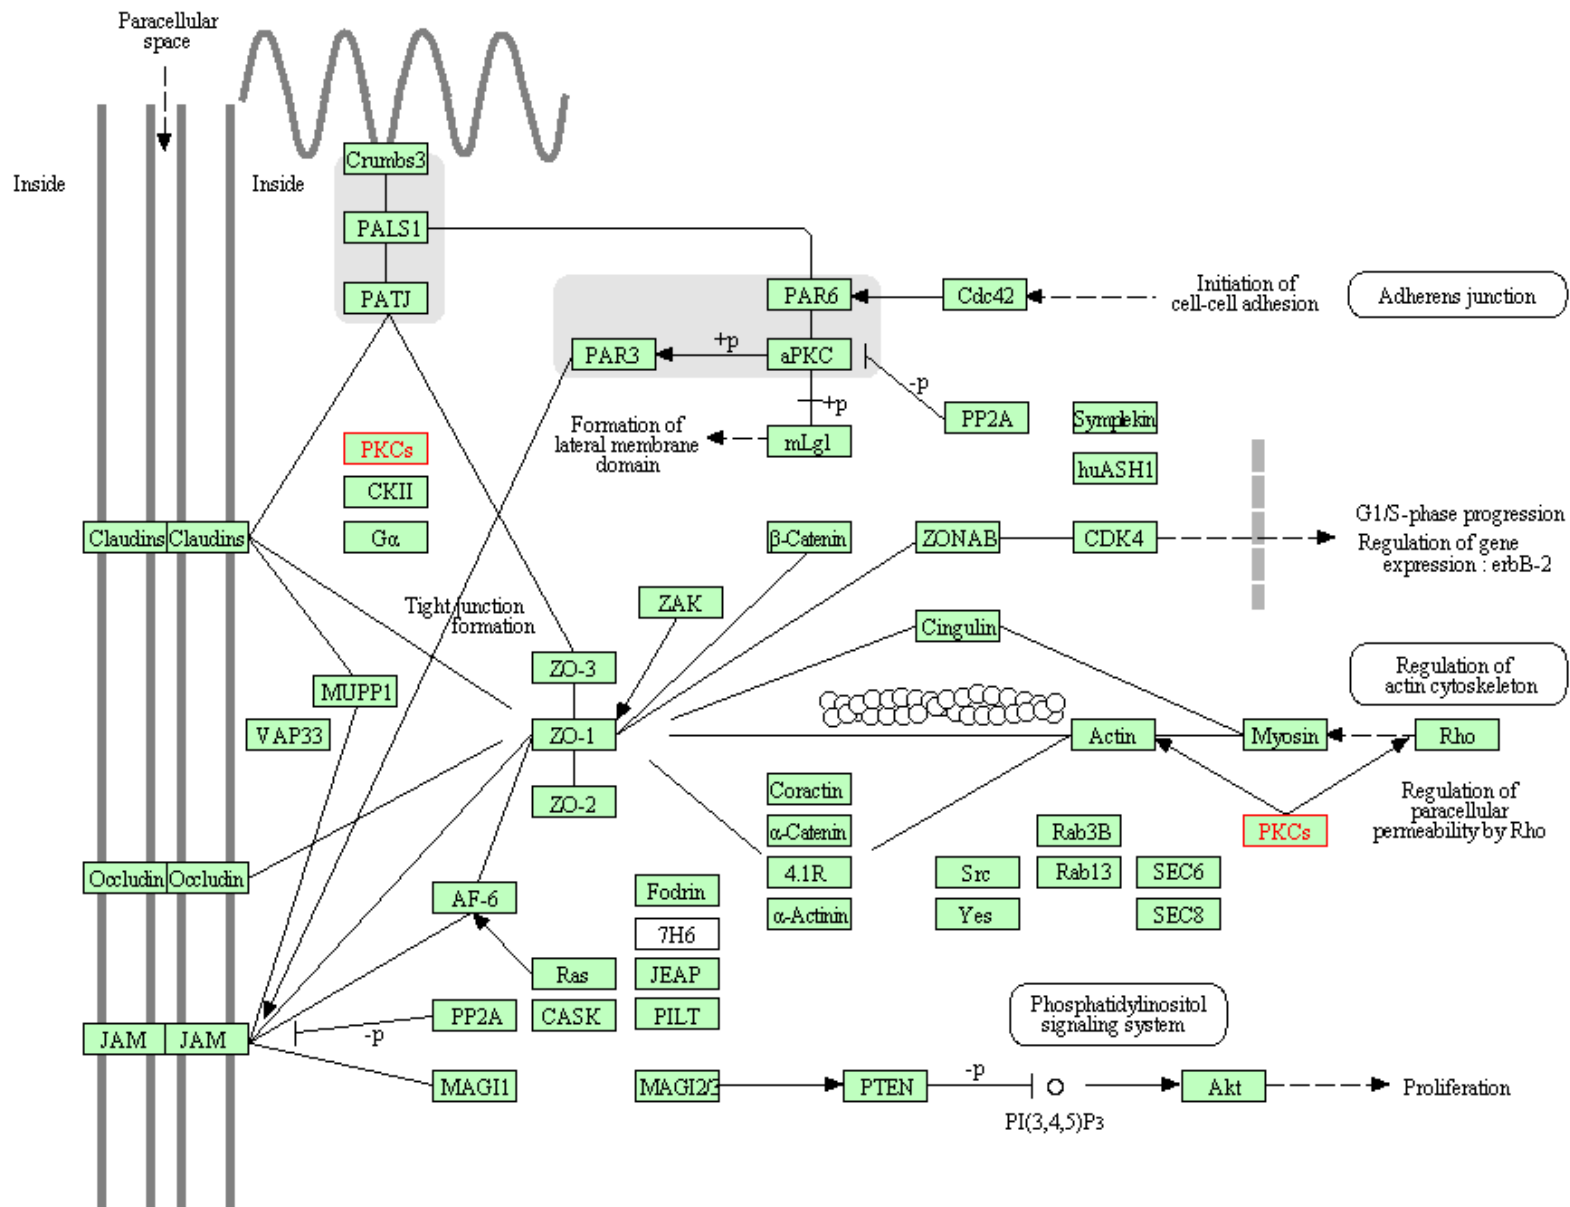

# GLIOMA

## De Novo pathway

Glial progenitor cell

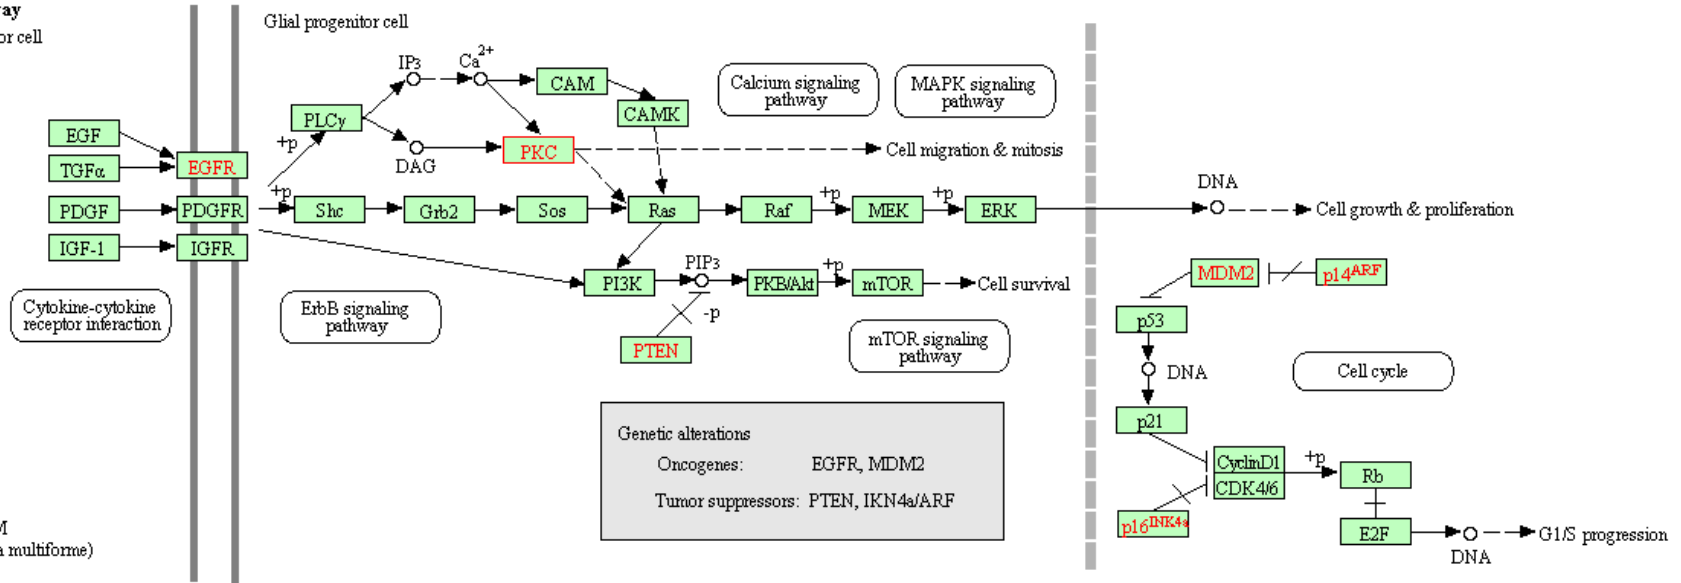

Primary GBM  
(Glioblastoma multiforme)

## Secondary pathway

Glial progenitor cell

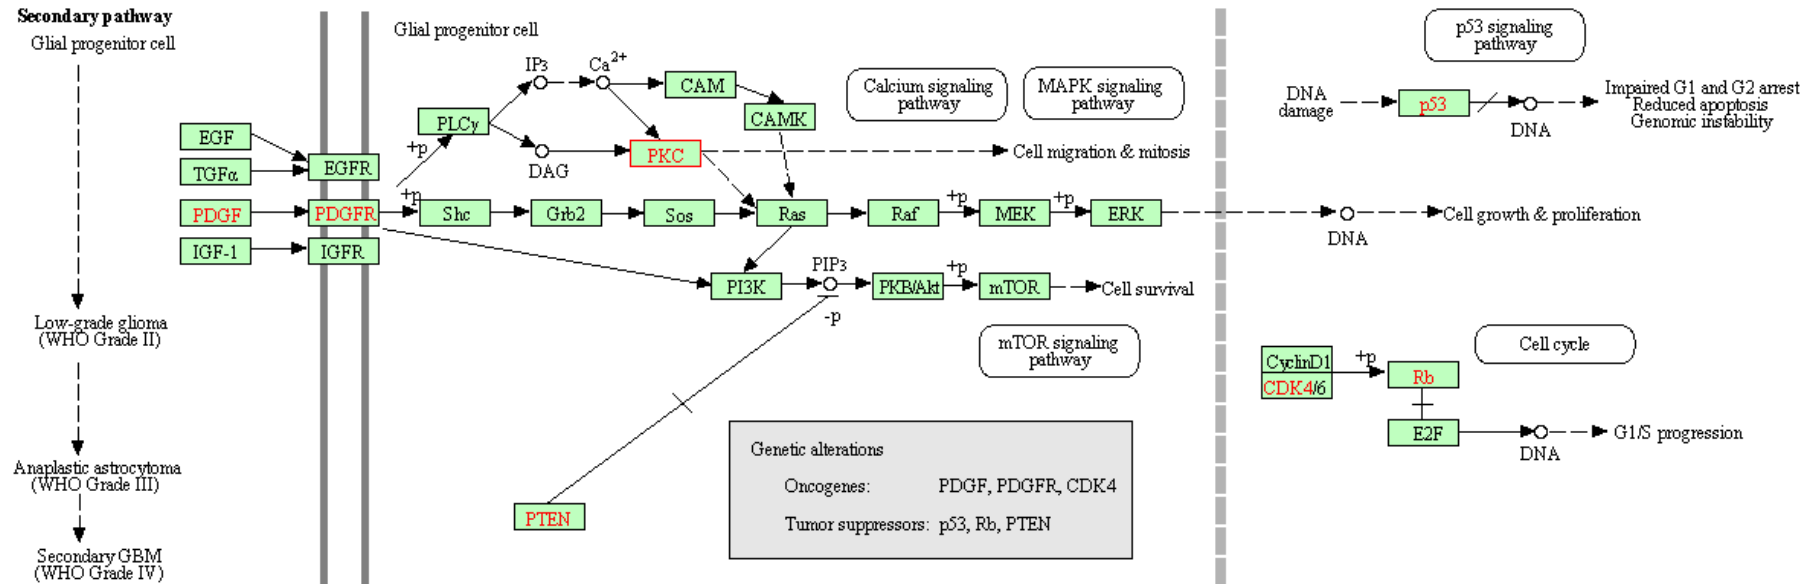

Low-grade glioma  
(WHO Grade II)

Anaplastic astrocytoma  
(WHO Grade III)

Secondary GBM  
(WHO Grade IV)

**Supplementary Fig. 8.** Visualization of methylation peaks in exercise-related genes. A total of 23 genes in two horses were selected and the methylation peaks were provided by the UCSC Genome Browser custom tracks.

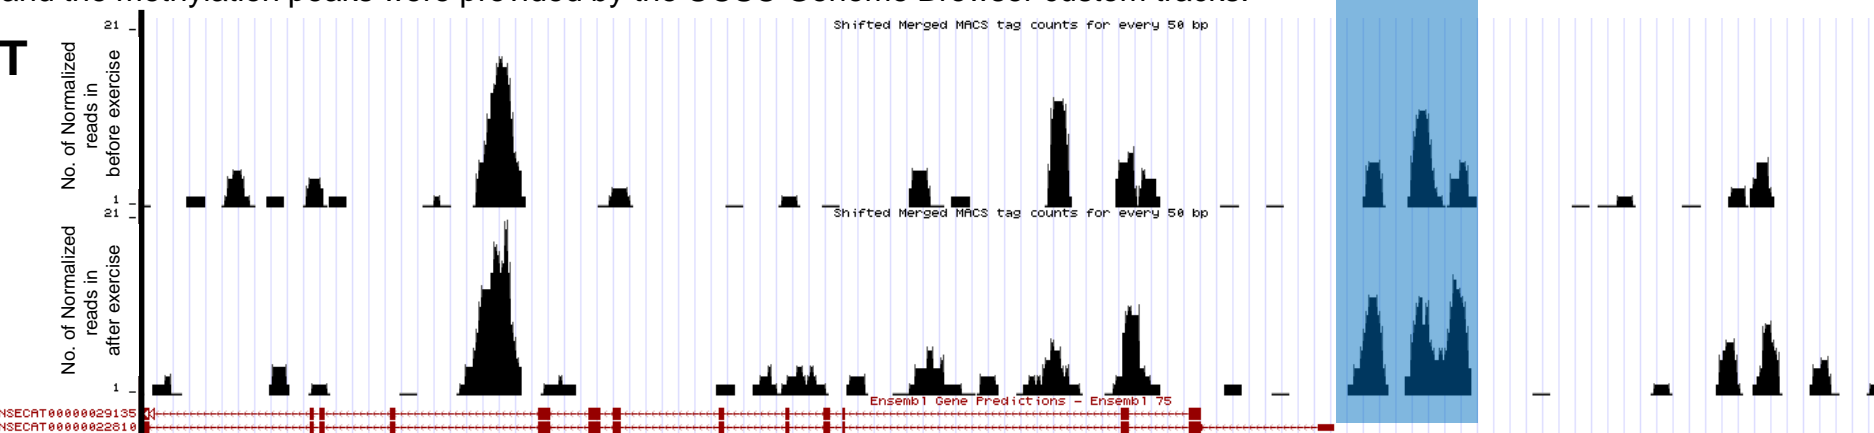

(T) The *ANAPC1* (Anaphase-promoting complex subunit 1) gene is located in chr15:14,841,594-14,951,441. The upstream region is hypermethylated in GEUMBIT SESANG after exercise. GO and KEGG terms include this gene as follows. BP: Cell cycle, BP: Cell adhesion, CC: Cytosol.

**Supplementary Fig. 8.** Visualization of methylation peaks in exercise-related genes. A total of 23 genes in two horses were selected and the methylation peaks were provided by the UCSC Genome Browser custom tracks.

**U**

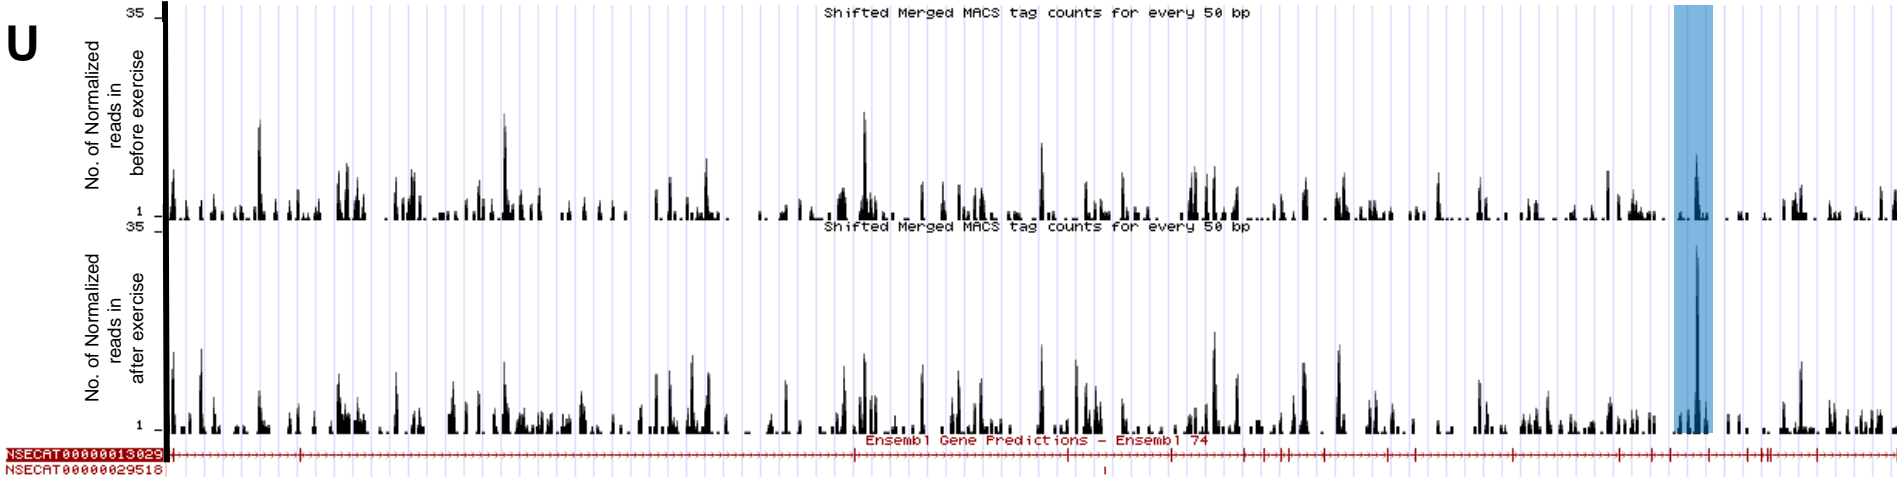

(U) The *DLG1* (Disks large homolog 1) gene is located in chr19:32,456,460-32,709,089. The intron region is hypermethylated in GEUMBIT SESANG after exercise. GO and KEGG terms include this gene as follows. BP: Cell adhesion, CC: Cytosol, CC: Endomembrane system.

**Supplementary Fig. 8.** Visualization of methylation peaks in exercise-related genes. A total of 23 genes in two horses were selected and the methylation peaks were provided by the UCSC Genome Browser custom tracks.

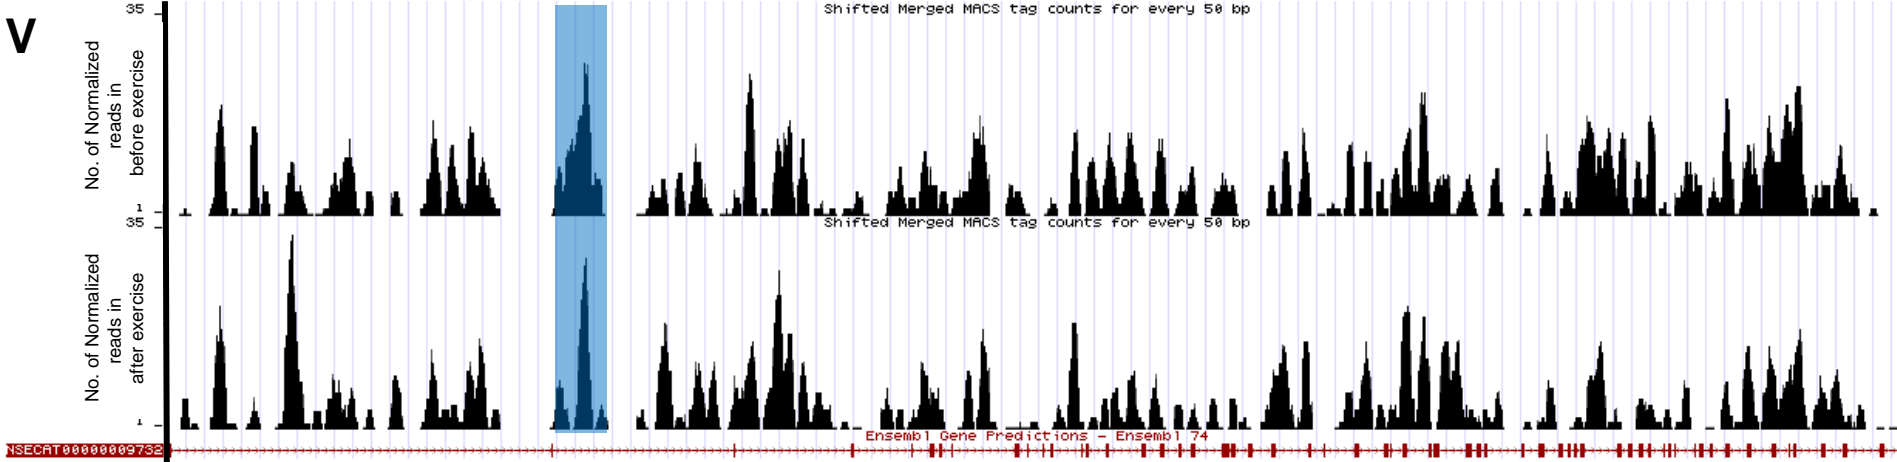

(V) The *ITPR3* (Inositol 1,4,5-trisphosphate receptor, type 3) gene is located in chr20:33,949,360-34,014,422. The intron region is hypomethylated in GEUMBIT SESANG after exercise. GO and KEGG terms include this gene as follows. BP: Transmembrane transport, CC: Plasma membrane part, MF: Passive transmembrane transporter activity, MF: Substrate specific channel activity, MF: Gated channel activity, KEGG: GnRH signaling pathway.

# GnRH SIGNALING PATHWAY

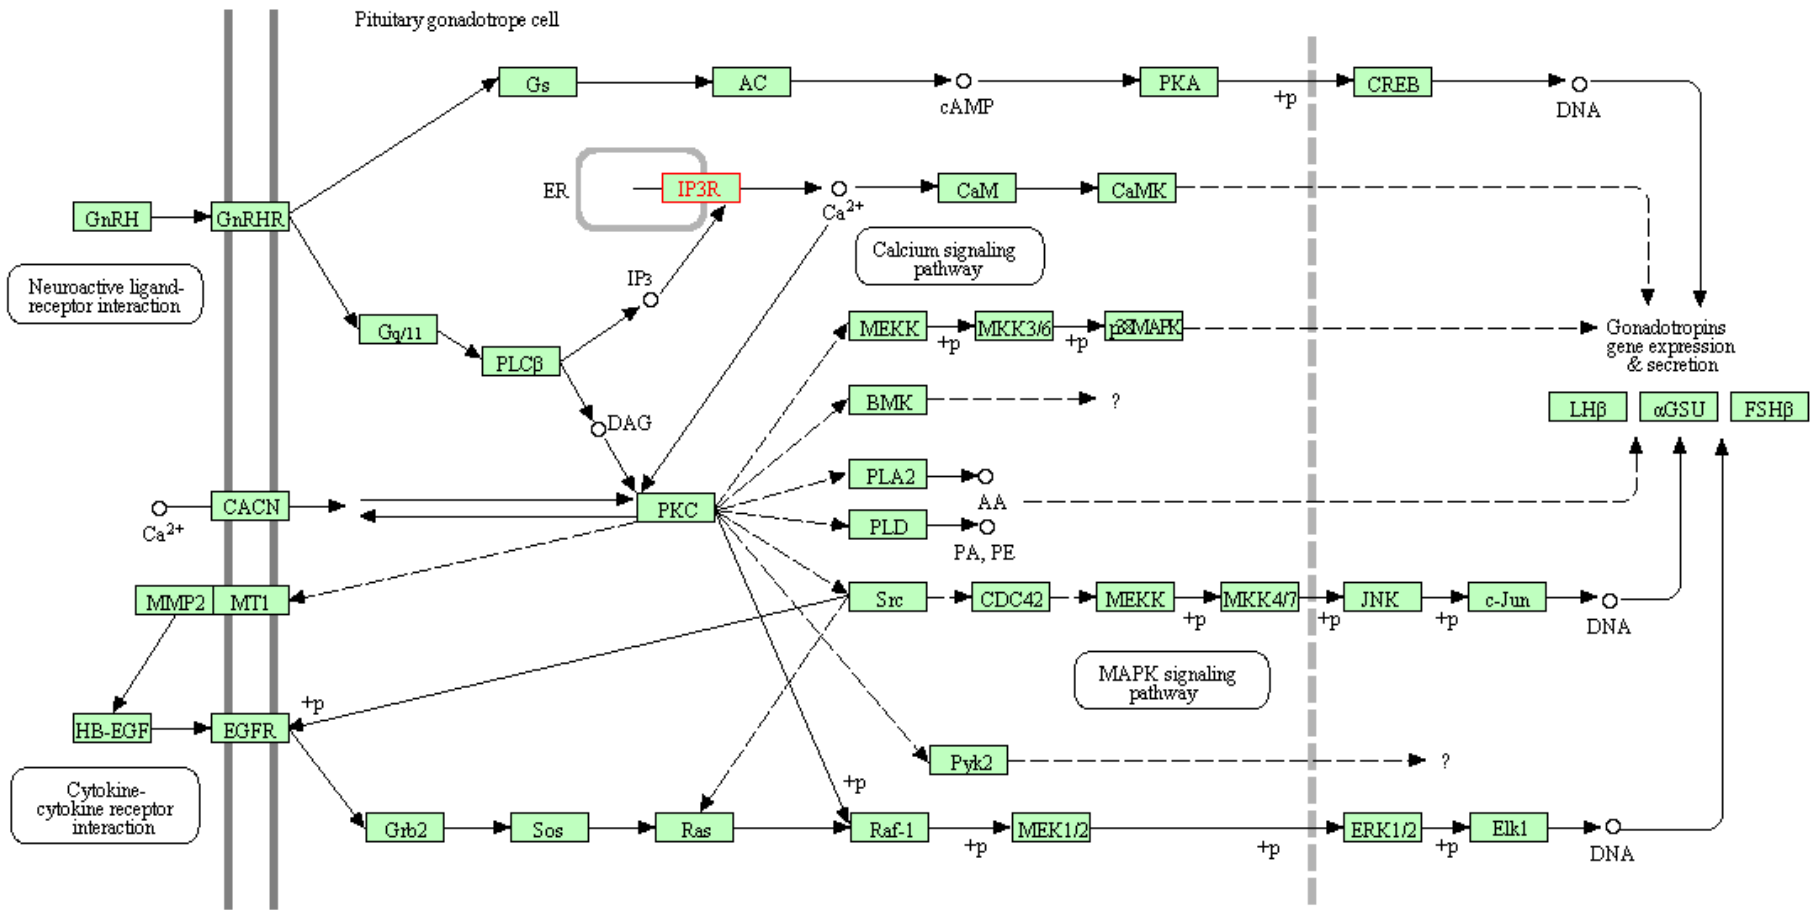

**Supplementary Fig. 8.** Visualization of methylation peaks in exercise-related genes. A total of 23 genes in two horses were selected and the methylation peaks were provided by the UCSC Genome Browser custom tracks.

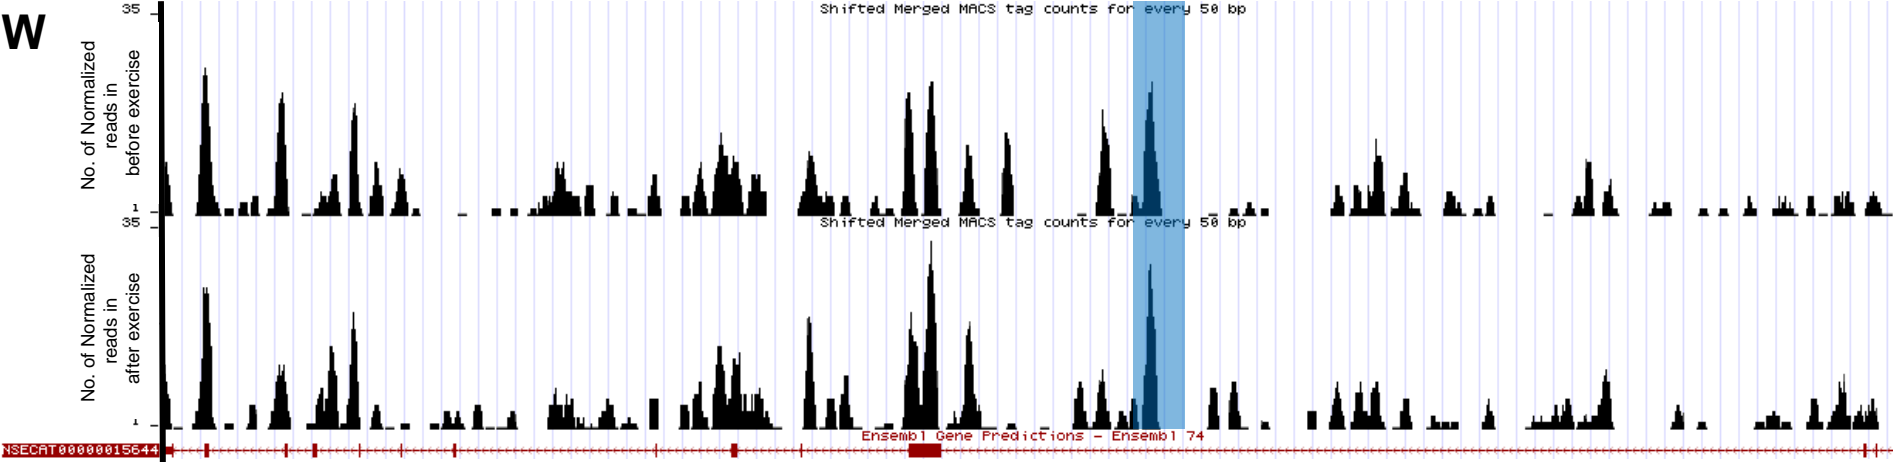

(W) The *TACC1* (Transforming acidic coiled-coil-containing protein 1) gene is located in chr27:6,993,558-7,052,436. The intron region is hypermethylated in GEUMBIT SESANG after exercise. GO and KEGG terms include this gene as follows. BP: Cell cycle, BP: Cell division, CC: Microtubule cytoskeleton.



**Supplementary Fig. 8.** Visualization of methylation peaks in exercise-related genes. A total of 23 genes in two horses were selected and the methylation peaks were provided by the UCSC Genome Browser custom tracks.

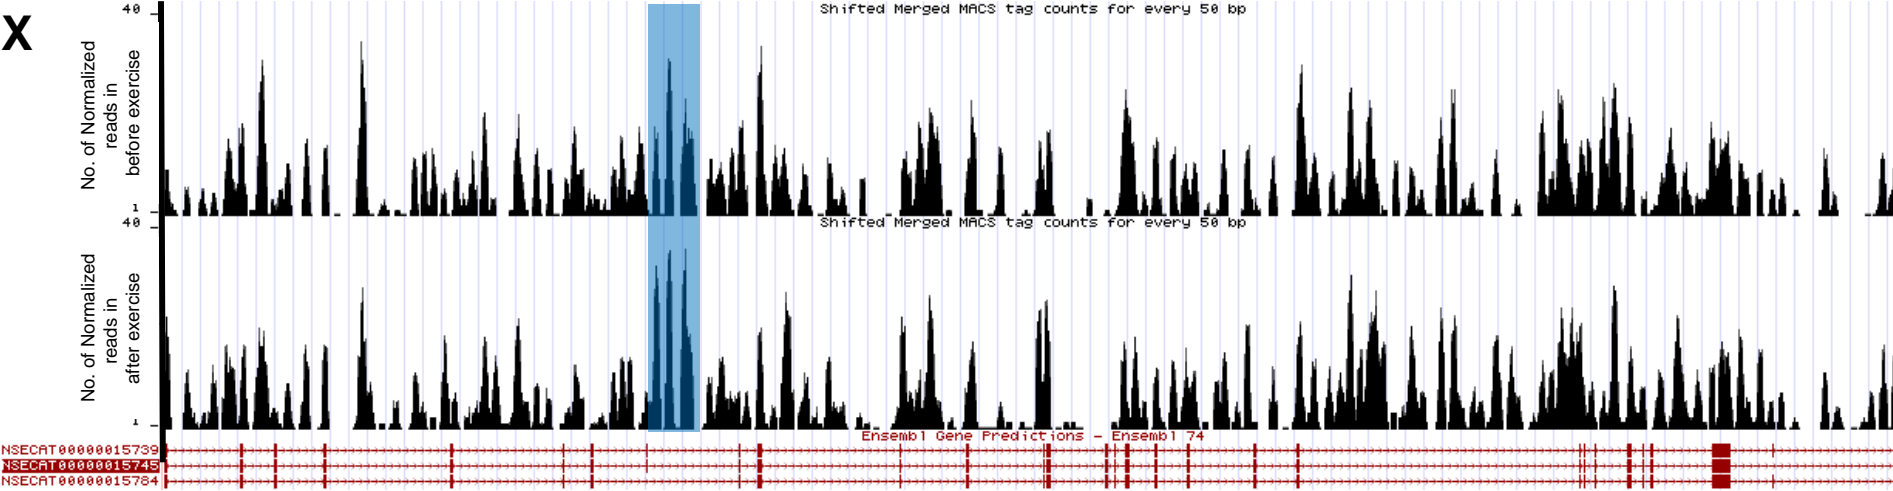

(X) The *MLLT4* gene is located in chr31:8,143,543-8,237,290. The intron region is hypermethylated in GEUMBIT SESANG after exercise. GO and KEGG terms include this gene as follows. BP: Cell adhesion, CC: Cytosol, KEGG: Adherens junction, KEGG: Tight junction.

# ADHERENS JUNCTION

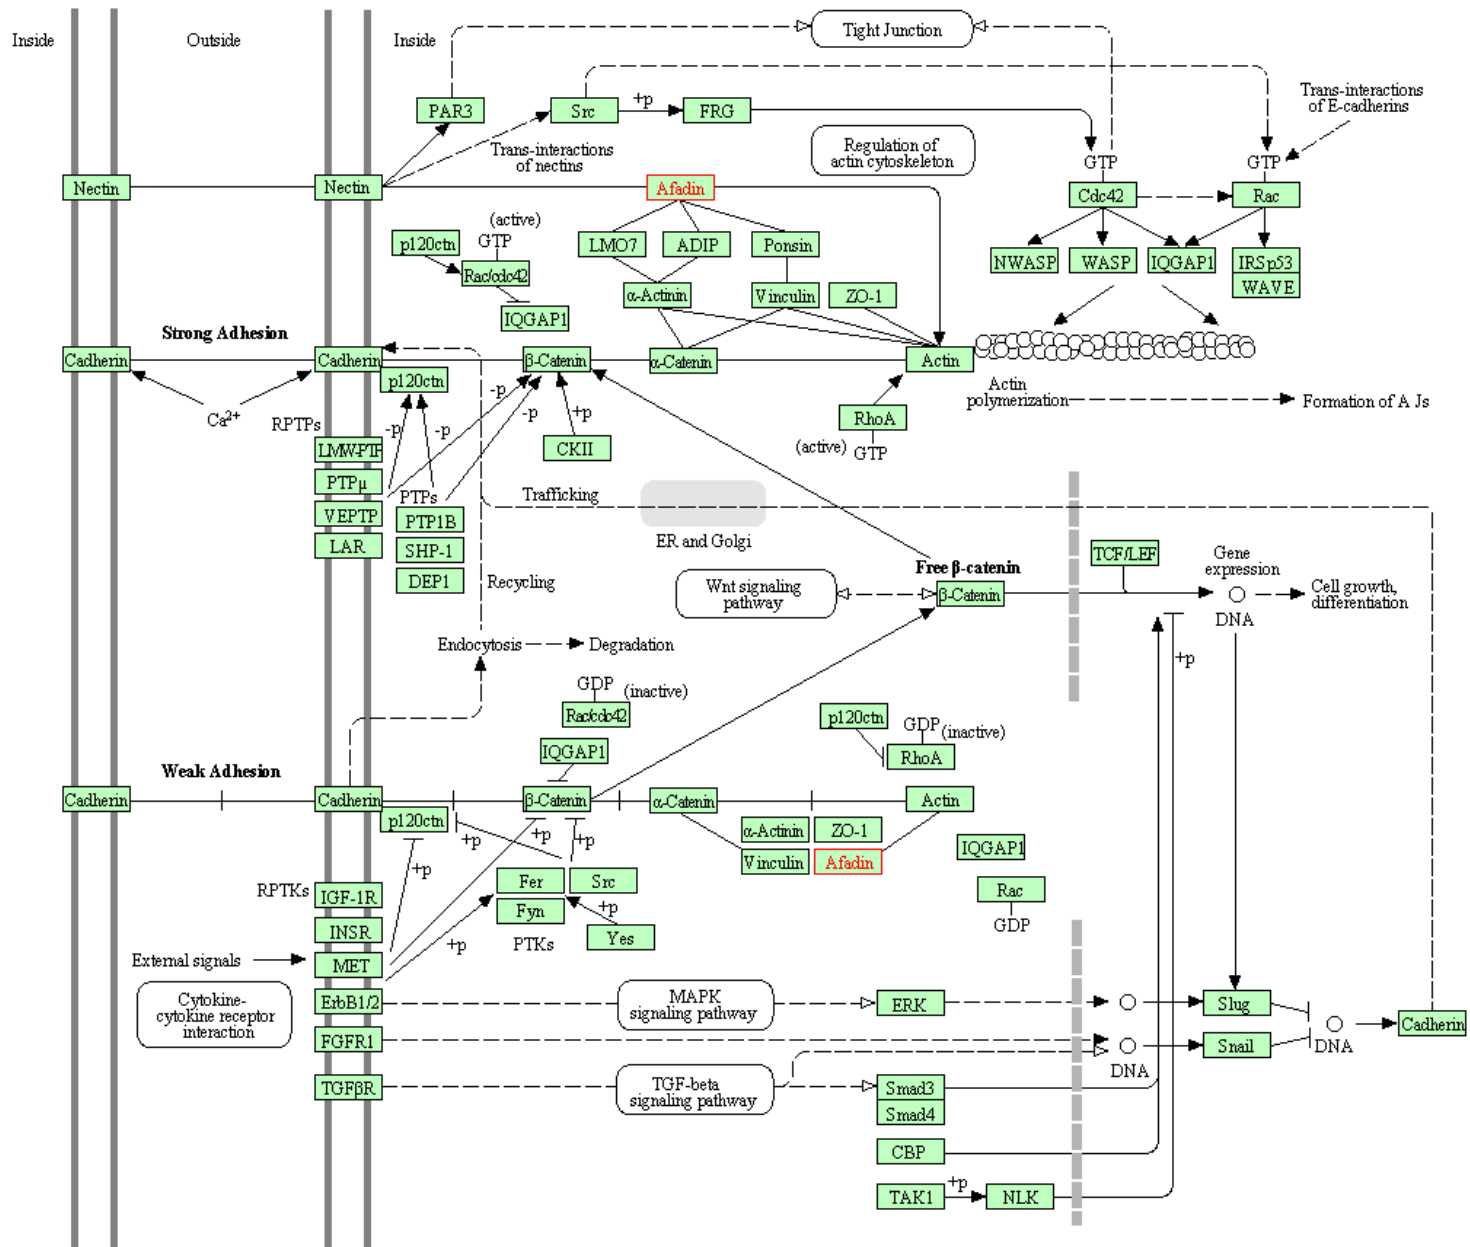

# TIGHT JUNCTION

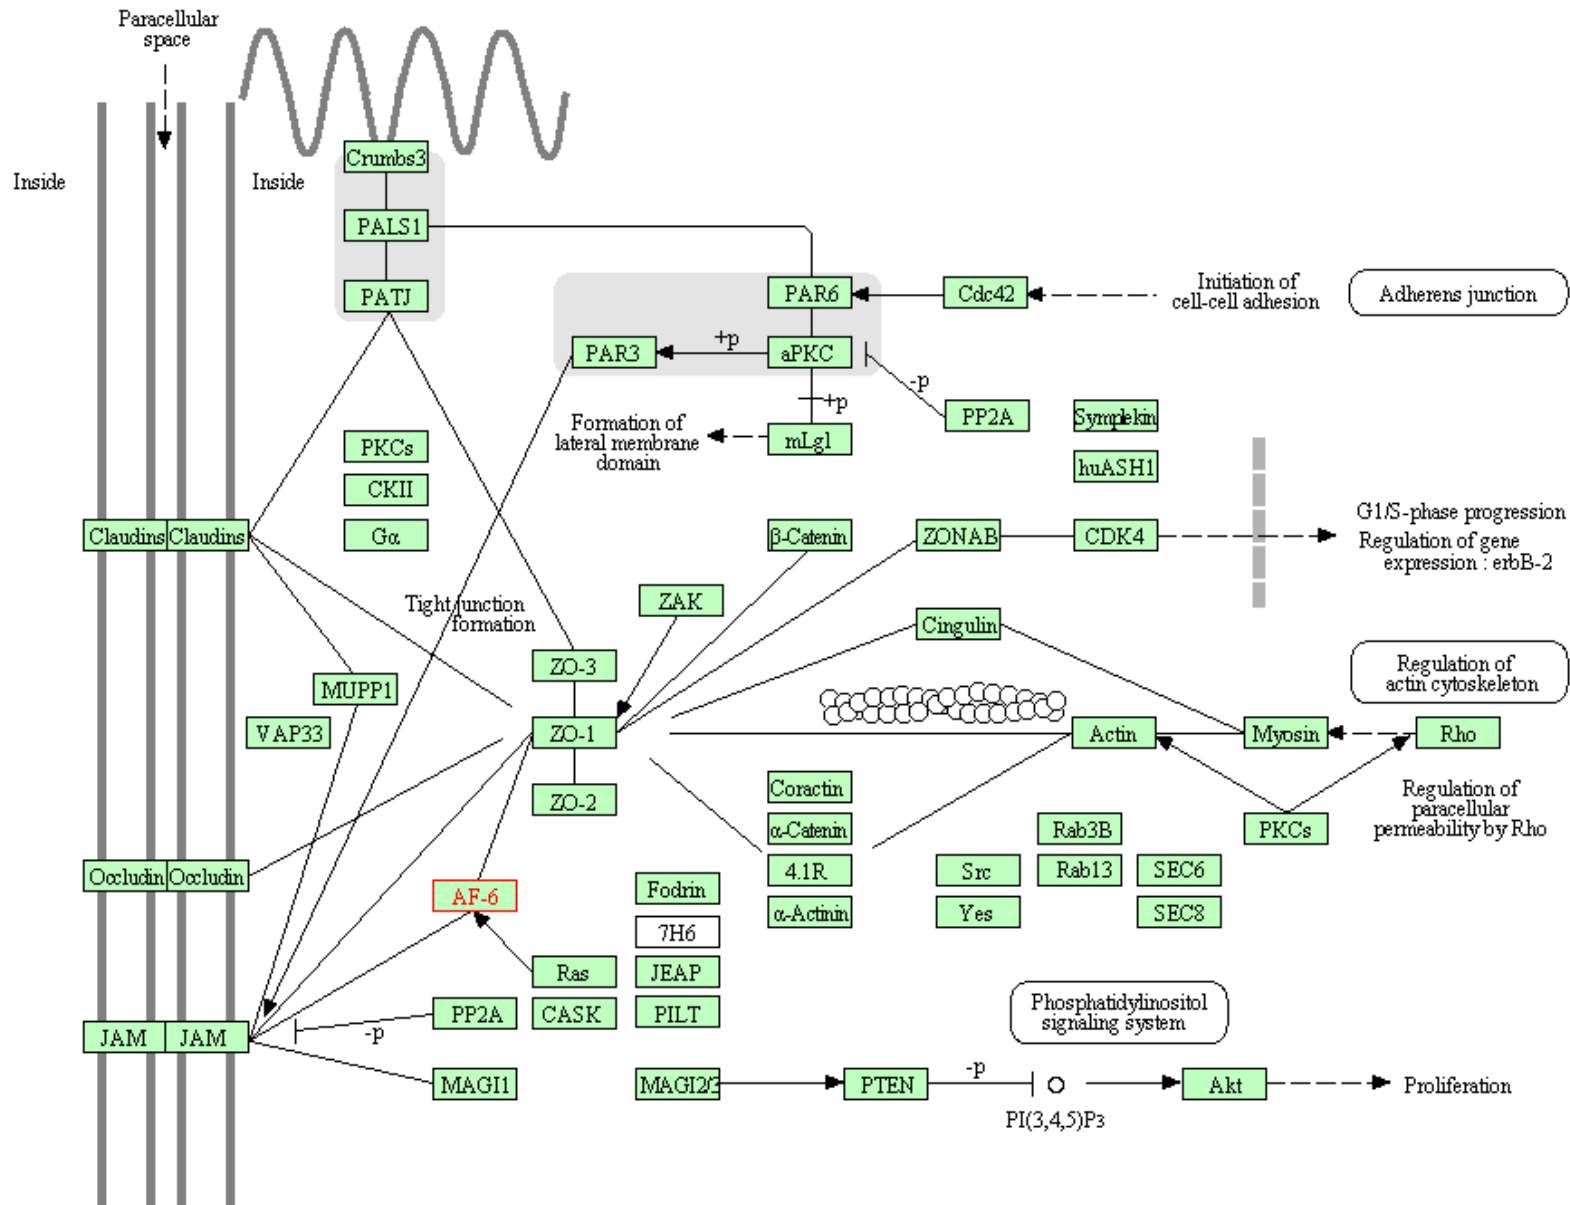

Supplement: molcell-38-3-210-supple1.pdf [file molcell-38-3-210-supple1.pdf]
