# Supplementary material for: Genome-Wide Analysis of DNA Methylation before-and after Exercise in the Thoroughbred Horse with MeDIP-Seq
Source: PubMed Central journal article supplement — Mol Cells. 2015 Jan 30;38(3):210–20. doi: 10.14348/molcells.2015.2138 (PMC4363720; doi:10.14348/molcells.2015.2138), 2015-01-30
Supplement: molcell-38-3-210-supple2.pdf [file molcell-38-3-210-supple2.pdf]

**Supplementary Table 1.** Information regarding the horses evaluated in this study.

| Horse name       | Life number | Age | Sex    | Hair color | Price of the horse (KRW) |
|------------------|-------------|-----|--------|------------|--------------------------|
| JIGUSANG SERYEOK | KOR05218979 | 8   | Female | Chestnut   | ---                      |
| GEUMBIT SESANG   | KOR06120650 | 7   | Male   | Brown      | ₩149,645,000             |

**Supplementary Table 2.** Information regarding the primers used to validate the methylation state of target gene promoter region by BSP, and assess expression by using real-time RT-PCR.

| Gene                           | Accession number      | Direction | Sequences (5'-3')              | Amplify size (bp) |
|--------------------------------|-----------------------|-----------|--------------------------------|-------------------|
| <i>ZNF80</i> (for BSP)         | ENSECAT000000506<br>2 | Forward   | GGTTTTGGGATTTGTAGTTTATTG       | 203               |
|                                |                       | Reverse   | AACCTAATCCAACCTACCCCAACT       |                   |
| <i>POU1F1</i> (for BSP)        | ENSECAT000000961<br>5 | Forward   | TAAAGGGATTTTTTTGTAGTATAAG      | 160               |
|                                |                       | Reverse   | AAAAAAAATACTACTCCCAAATC        |                   |
| <i>MFGES</i> (for BSP)         | ENSECAT000002028<br>5 | Forward   | TAGGGGAGGGGATTAATTTGTTA        | 292               |
|                                |                       | Reverse   | CACCTTAACATCCCAAAAAACTAC       |                   |
| <i>ANAPC1</i> (for BSP)        | ENSECAT000002281<br>0 | Forward   | TGTAGTAATAGTTGTTAATGTAGAGATTTG | 421               |
|                                |                       | Reverse   | AACCTTTCTACTCATAAAATCCAAAC     |                   |
| <i>ANAPC1</i> (for expression) | ENSECAT000002281<br>0 | Forward   | GCAAACACCACCCTAATGCT           | 142               |
|                                |                       | Reverse   | TGCCAGCTTTCCTTCTGTTT           |                   |
| <i>GAPDH</i>                   | ENSECAT000002372<br>1 | Forward   | ATCTGACCTGCCGCCTGGAG           | 68                |
|                                |                       | Reverse   | CGATGCCTGCTTCACCACCTTC         |                   |

**Supplementary Table 3.** The general information of read alignment in the genomes of the blood samples collected from the two thoroughbred horses before and after trotting.

|                                               | JIGUSANG SERYEOK |                | GEUMBIT SESANG  |                |
|-----------------------------------------------|------------------|----------------|-----------------|----------------|
|                                               | Before exercise  | After exercise | Before exercise | After exercise |
| Data size (Gb)                                | 1.20             | 1.19           | 1.15            | 1.20           |
| Total sequenced reads (No.)                   | 24,489,796       | 24,251,782     | 23,506,720      | 24,489,796     |
| Mapped reads (No.)                            | 20,888,843       | 20,850,727     | 19,905,128      | 21,304,452     |
| Mapping rate (%)                              | 85.30            | 85.98          | 84.68           | 86.99          |
| Effective chain depth <sup>1</sup>            | 0.43             | 0.43           | 0.41            | 0.44           |
| Uniquely mapped reads (No.)                   | 17,847,159       | 17,745,354     | 16,700,660      | 18,540,301     |
| Unique mapping rate (%) <sup>2</sup>          | 72.88            | 73.17          | 71.05           | 75.71          |
| Total predicted peaks (No.)                   | 105,303          | 92,969         | 81,140          | 98,210         |
| Average peak length (bp)                      | 860              | 878            | 889             | 883            |
| Median peak length (bp)                       | 774              | 791            | 802             | 796            |
| Total length of peaks (bp)                    | 90,566,979       | 81,629,516     | 72,173,605      | 86,699,687     |
| Peak-covered size in the reference genome (%) | 3.83             | 3.45           | 3.05            | 3.66           |

<sup>1</sup>Effective chain depth = total length of mapped reads / the size of the reference genome

<sup>2</sup>Unique mapping rate = total uniquely mapped reads / total sequenced reads

**Supplementary Table 4.** Number of different genomic regions in the reference genome (EquCab2).

|         | <b>Promoter</b> | <b>5' UTR</b> | <b>Exon</b> | <b>Intron</b> | <b>3' UTR</b> | <b>Downstream</b> | <b>Repeat</b> | <b>Others</b> |
|---------|-----------------|---------------|-------------|---------------|---------------|-------------------|---------------|---------------|
| EquCab2 | 27,554          | 12,441        | 205,323     | 178,583       | 11,862        | 27,488            | 2,501,645     | 7,576,494     |

**Supplementary Table 5.** Frequency of methylation peaks in different genomic regions.

|                  |                 | Promoter | 5' UTR | Exon  | Intron | 3' UTR | Downstream | Repeat | Others |
|------------------|-----------------|----------|--------|-------|--------|--------|------------|--------|--------|
| JIGUSANG SERYEOK | Before exercise | 0.075    | 0.005  | 0.023 | 0.168  | 0.013  | 0.073      | 0.012  | 0.005  |
|                  | After exercise  | 0.067    | 0.006  | 0.021 | 0.146  | 0.011  | 0.066      | 0.010  | 0.004  |
| GEUMBIT SESANG   | Before exercise | 0.056    | 0.004  | 0.019 | 0.128  | 0.009  | 0.056      | 0.009  | 0.004  |
|                  | After exercise  | 0.069    | 0.005  | 0.020 | 0.156  | 0.013  | 0.071      | 0.011  | 0.005  |

Frequency of peaks = Peak distribution / Numbers of different genomic regions in the EquCab2













|      |          |          |    |    |        |        |            |            |   |                 |            |       |        |   |     |
|------|----------|----------|----|----|--------|--------|------------|------------|---|-----------------|------------|-------|--------|---|-----|
| cm51 | 538267   | 538388   | 32 | 69 | 31,579 | 69,532 | 1.14697293 | 0.02030302 | 0 | HyperExposition | TG00400079 | LIMAD | LABEL1 | C | 29  |
| cm51 | 2014821  | 2014821  | 21 | 46 | 20,724 | 46,427 | 1.0282044  | 0.02030304 | 0 | HyperExposition | TG00400080 | LIMAD | LABEL1 | C | 311 |
| cm51 | 220014   | 220110   | 20 | 47 | 19,737 | 47,625 | 1.2711127  | 0.0203040  | 0 | HyperExposition | TG00400482 | LIMAD | LABEL1 | C | 143 |
| cm51 | 207571   | 207571   | 14 | 23 | 19,855 | 42,321 | 1.02222222 | 0.02030404 | 0 | HyperExposition | TG00400483 | LIMAD | LABEL1 | C | 248 |
| cm51 | 1347424  | 1347538  | 14 | 20 | 13,816 | 30,465 | 1.17969262 | 0.02030505 | 0 | HyperExposition | TG00400490 | LIMAD | LABEL1 | C | 154 |
| cm52 | 5275545  | 5276255  | 16 | 37 | 16,789 | 37,2   | 1.24791799 | 0.02030608 | 0 | HyperExposition | TG00400637 | LIMAD | LABEL1 | C | 411 |
| cm52 | 4572021  | 4572021  | 17 | 41 | 16,776 | 41,554 | 1.39888889 | 0.02030709 | 0 | HyperExposition | TG00400638 | LIMAD | LABEL1 | C | 411 |
| cm52 | 8076884  | 8076882  | 17 | 41 | 16,776 | 41,554 | 1.39888889 | 0.02030709 | 0 | HyperExposition | TG00400639 | LIMAD | LABEL1 | C | 184 |
| cm52 | 3048752  | 3048752  | 14 | 27 | 13,816 | 29,244 | 1.22222222 | 0.02030810 | 0 | HyperExposition | TG00400640 | LIMAD | LABEL1 | C | 184 |
| cm52 | 3048752  | 3048752  | 32 | 66 | 31,579 | 69,532 | 1.0282044  | 0.02030810 | 0 | HyperExposition | TG00400641 | LIMAD | LABEL1 | C | 130 |
| cm52 | 7720800  | 7720800  | 30 | 75 | 30,7   | 76,014 | 1.01935055 | 0.02030911 | 0 | HyperExposition | TG00400688 | LIMAD | LABEL1 | C | 107 |
| cm52 | 34545    | 34545    | 22 | 41 | 21,111 | 46,427 | 1.02222222 | 0.02030911 | 0 | HyperExposition | TG00400689 | LIMAD | LABEL1 | C | 110 |
| cm52 | 1045024  | 1045024  | 14 | 23 | 14,448 | 31,579 | 1.15222222 | 0.02030911 | 0 | HyperExposition | TG00400755 | LIMAD | LABEL1 | C | 74  |
| cm51 | 9156200  | 9156200  | 14 | 23 | 14,448 | 31,579 | 1.0282044  | 0.02030911 | 0 | HyperExposition | TG00400756 | LIMAD | LABEL1 | C | 74  |
| cm51 | 9156200  | 9156200  | 14 | 23 | 14,448 | 31,579 | 1.0282044  | 0.02030911 | 0 | HyperExposition | TG00400757 | LIMAD | LABEL1 | C | 74  |
| cm51 | 1835642  | 1835770  | 15 | 27 | 14,803 | 32,1   | 1.41012101 | 0.02030911 | 0 | HyperExposition | TG00400854 | LIMAD | LABEL1 | C | 69  |
| cm51 | 1835642  | 1835770  | 15 | 27 | 14,803 | 32,1   | 1.41012101 | 0.02030911 | 0 | HyperExposition | TG00400855 | LIMAD | LABEL1 | C | 113 |
| cm51 | 2833489  | 2833274  | 23 | 63 | 22,807 | 63,851 | 1.46255154 | 0.02030911 | 0 | HyperExposition | TG00401468 | LIMAD | LABEL1 | C | 254 |
| cm51 | 2833489  | 2833274  | 23 | 63 | 22,807 | 63,851 | 1.46255154 | 0.02030911 | 0 | HyperExposition | TG00401469 | LIMAD | LABEL1 | C | 254 |
| cm51 | 9232000  | 9232054  | 16 | 36 | 15,771 | 35,473 | 1.05491454 | 0.02031102 | 0 | HyperExposition | TG00400320 | LIMAD | LABEL1 | C | 480 |
| cm51 | 9232000  | 9232054  | 22 | 60 | 21,111 | 46,427 | 1.22222222 | 0.02031102 | 0 | HyperExposition | TG00400321 | LIMAD | LABEL1 | C | 480 |
| cm51 | 4238767  | 4238763  | 31 | 77 | 30,522 | 78,041 | 1.59173890 | 0.02032306 | 0 | HyperExposition | TG00400389 | LIMAD | LABEL1 | C | 130 |
| cm51 | 10270828 | 10270814 | 26 | 63 | 26,624 | 61,624 | 1.46255154 | 0.02032306 | 0 | HyperExposition | TG00400423 | LIMAD | LABEL1 | C | 147 |
| cm51 | 7720800  | 7720800  | 30 | 75 | 30,553 | 81,122 | 1.33091388 | 0.02032678 | 0 | HyperExposition | TG00400224 | LIMAD | LABEL1 | C | 239 |
| cm51 | 7720800  | 7720800  | 30 | 75 | 30,553 | 81,122 | 1.33091388 | 0.02032678 | 0 | HyperExposition | TG00400225 | LIMAD | LABEL1 | C | 239 |
| cm51 | 14388    | 14388    | 21 | 42 | 21,728 | 46,427 | 1.02222222 | 0.02032678 | 0 | HyperExposition | TG00400427 | LIMAD | LABEL1 | C | 275 |
| cm51 | 4238767  | 4238763  | 14 | 28 | 13,816 | 28,718 | 1.0282044  | 0.02032678 | 0 | HyperExposition | TG00400922 | LIMAD | LABEL1 | C | 17  |
| cm51 | 2463200  | 2462267  | 25 | 66 | 24,421 | 66,802 | 1.43617467 | 0.02032701 | 0 | HyperExposition | TG00401952 | LIMAD | LABEL1 | C | 17  |
| cm51 | 2463200  | 2462267  | 25 | 66 | 24,421 | 66,802 | 1.43617467 | 0.02032701 | 0 | HyperExposition | TG00401953 | LIMAD | LABEL1 | C | 17  |
| cm51 | 1726562  | 1726254  | 22 | 50 | 20,724 | 50,676 | 1.22222222 | 0.02032816 | 0 | HyperExposition | TG00400511 | LIMAD | LABEL1 | C | 80  |
| cm51 | 2657876  | 2658261  | 24 | 47 | 23,523 | 50,676 | 1.1717076  | 0.02032816 | 0 | HyperExposition | TG00400586 | LIMAD | LABEL1 | C | 80  |
| cm51 | 3611700  | 3612269  | 16 | 44 | 15,789 | 44,556 | 1.49526120 | 0.02032816 | 0 | HyperExposition | TG00400937 | LIMAD | LABEL1 | C | 240 |
| cm51 | 3611700  | 3612269  | 16 | 44 | 15,789 | 44,556 | 1.49526120 | 0.02032816 | 0 | HyperExposition | TG00400938 | LIMAD | LABEL1 | C | 240 |
| cm51 | 3707202  | 3708954  | 15 | 36 | 14,803 | 38,514 | 1.37042203 | 0.02032816 | 0 | HyperExposition | TG00400939 | LIMAD | LABEL1 | C | 240 |
| cm51 | 134467   | 134461   | 15 | 36 | 14,803 | 38,514 | 1.1124844  | 0.02032816 | 0 | HyperExposition | TG00400940 | LIMAD | LABEL1 | C | 240 |
| cm51 | 4932288  | 4932398  | 15 | 36 | 14,803 | 38,514 | 1.37042203 | 0.02032816 | 0 | HyperExposition | TG00400941 | LIMAD | LABEL1 | C | 240 |
| cm51 | 4932288  | 4932398  | 15 | 36 | 14,803 | 38,514 | 1.37042203 | 0.02032816 | 0 | HyperExposition | TG00400942 | LIMAD | LABEL1 | C | 240 |
| cm51 | 520615   | 520578   | 16 | 30 | 15,789 | 35,446 | 1.0282044  | 0.02032816 | 0 | HyperExposition | TG00400927 | LIMAD | LABEL1 | C | 17  |
| cm51 | 412618   | 412618   | 14 | 23 | 14,448 | 31,579 | 1.0282044  | 0.02032816 | 0 | HyperExposition | TG00400928 | LIMAD | LABEL1 | C | 17  |
| cm51 | 448440   | 448501   | 15 | 30 | 20,724 | 50,676 | 1.22691604 | 0.02032816 | 0 | HyperExposition | TG00400927 | LIMAD | LABEL1 | C | 287 |
| cm51 | 457919   | 457919   | 14 | 23 | 13,816 | 31,579 | 1.17969262 | 0.02032816 | 0 | HyperExposition | TG00400928 | LIMAD | LABEL1 | C | 287 |
| cm51 | 457919   | 457919   | 14 | 23 | 13,816 | 31,579 | 1.17969262 | 0.02032816 | 0 | HyperExposition | TG00400929 | LIMAD | LABEL1 | C | 287 |
| cm51 | 457919   | 457919   | 14 | 23 | 13,816 | 31,579 | 1.17969262 | 0.02032816 | 0 | HyperExposition | TG00400930 | LIMAD | LABEL1 | C | 287 |
| cm51 | 457919   | 457919   | 14 | 23 | 13,816 | 31,579 | 1.17969262 | 0.02032816 | 0 | HyperExposition | TG00400931 | LIMAD | LABEL1 | C | 287 |
| cm51 | 457919   | 457919   | 14 | 23 | 13,816 | 31,579 | 1.17969262 | 0.02032816 | 0 | HyperExposition | TG00400932 | LIMAD | LABEL1 | C | 287 |
| cm51 | 457919   | 457919   | 14 | 23 | 13,816 | 31,579 | 1.17969262 | 0.02032816 | 0 | HyperExposition | TG00400933 | LIMAD | LABEL1 | C | 287 |
| cm51 | 457919   | 457919   | 14 | 23 | 13,816 | 31,579 | 1.17969262 | 0.02032816 | 0 | HyperExposition | TG00400934 | LIMAD | LABEL1 | C | 287 |
| cm51 | 457919   | 457919   | 14 | 23 | 13,816 | 31,579 | 1.17969262 | 0.02032816 | 0 | HyperExposition | TG00400935 | LIMAD | LABEL1 | C | 287 |
| cm51 | 457919   | 457919   | 14 | 23 | 13,816 | 31,579 | 1.17969262 | 0.02032816 | 0 | HyperExposition | TG00400936 | LIMAD | LABEL1 | C | 287 |
| cm51 | 457919   | 457919   | 14 | 23 | 13,816 | 31,579 | 1.17969262 | 0.02032816 | 0 | HyperExposition | TG00400937 | LIMAD | LABEL1 | C | 287 |
| cm51 | 457919   | 457919   | 14 | 23 | 13,816 | 31,579 | 1.17969262 | 0.02032816 | 0 | HyperExposition | TG00400938 | LIMAD | LABEL1 | C | 287 |
| cm51 | 457919   | 457919   | 14 | 23 | 13,816 | 31,579 | 1.17969262 | 0.02032816 | 0 | HyperExposition | TG00400939 | LIMAD | LABEL1 | C | 287 |
| cm51 | 457919   | 457919   | 14 | 23 | 13,816 | 31,579 | 1.17969262 | 0.02032816 | 0 | HyperExposition | TG00400940 | LIMAD | LABEL1 | C | 287 |
| cm51 | 457919   | 457919   | 14 | 23 | 13,816 | 31,579 | 1.17969262 | 0.02032816 | 0 | HyperExposition | TG00400941 | LIMAD | LABEL1 | C | 287 |
| cm51 | 457919   | 457919   | 14 | 23 | 13,816 | 31,579 | 1.17969262 | 0.02032816 | 0 | HyperExposition | TG00400942 | LIMAD | LABEL1 | C | 287 |
| cm51 | 457919   | 457919   | 14 | 23 | 13,816 | 31,579 | 1.17969262 | 0.02032816 | 0 | HyperExposition | TG00400943 | LIMAD | LABEL1 | C | 287 |
| cm51 | 457919   | 457919   | 14 | 23 | 13,816 | 31,579 | 1.17969262 | 0.02032816 | 0 | HyperExposition | TG00400944 | LIMAD | LABEL1 | C | 287 |
| cm51 | 457919   | 457919   | 14 | 23 | 13,816 | 31,579 | 1.17969262 | 0.02032816 | 0 | HyperExposition | TG00400945 | LIMAD | LABEL1 | C | 287 |
| cm51 | 457919   | 457919   | 14 | 23 | 13,816 | 31,579 | 1.17969262 | 0.02032816 | 0 | HyperExposition | TG00400946 | LIMAD | LABEL1 | C | 287 |
| cm51 | 457919   | 457919   | 14 | 23 | 13,816 | 31,579 | 1.17969262 | 0.02032816 | 0 | HyperExposition | TG00400947 | LIMAD | LABEL1 | C | 287 |
| cm51 | 457919   | 457919   | 14 | 23 | 13,816 | 31,579 | 1.17969262 | 0.02032816 | 0 | HyperExposition | TG00400948 | LIMAD | LABEL1 | C | 287 |
| cm51 | 457919   | 457919   | 14 | 23 | 13,816 | 31,579 | 1.17969262 | 0.02032816 | 0 | HyperExposition | TG00400949 | LIMAD | LABEL1 | C | 287 |
| cm51 | 457919   | 457919   | 14 | 23 | 13,816 | 31,579 | 1.17969262 | 0.02032816 | 0 | HyperExposition | TG00400950 | LIMAD | LABEL1 | C | 287 |
| cm51 | 457919   | 457919   | 14 | 23 | 13,816 | 31,579 | 1.17969262 | 0.02032816 | 0 | HyperExposition | TG00400951 | LIMAD | LABEL1 | C | 287 |
| cm51 | 457919   | 457919   | 14 | 23 | 13,816 | 31,579 | 1.17969262 | 0.02032816 | 0 | HyperExposition | TG00400952 | LIMAD | LABEL1 | C | 287 |
| cm51 | 457919   | 457919   | 14 | 23 | 13,816 | 31,579 | 1.17969262 | 0.02032816 | 0 | HyperExposition | TG00400953 | LIMAD | LABEL1 | C | 287 |
| cm51 | 457919   | 457919   | 14 | 23 | 13,816 | 31,579 | 1.17969262 | 0.02032816 | 0 | HyperExposition | TG00400954 | LIMAD | LABEL1 | C | 287 |
| cm51 | 457919   | 457919   | 14 | 23 | 13,816 | 31,579 | 1.17969262 | 0.02032816 | 0 | HyperExposition | TG00400955 | LIMAD | LABEL1 | C | 287 |
| cm51 | 457919   | 457919   | 14 | 23 | 13,816 | 31,579 | 1.17969262 | 0.02032816 | 0 | HyperExposition | TG00400956 | LIMAD | LABEL1 | C | 287 |
| cm51 | 457919   | 457919   | 14 | 23 | 13,816 | 31,579 | 1.17969262 | 0.02032816 | 0 | HyperExposition | TG00400957 | LIMAD | LABEL1 | C | 287 |
| cm51 | 457919   | 457919   | 14 | 23 | 13,816 | 31,579 | 1.17969262 | 0.02032816 | 0 | HyperExposition | TG00400958 | LIMAD | LABEL1 | C | 287 |
| cm51 | 457919   | 457919   | 14 | 23 | 13,816 | 31,579 | 1.17969262 | 0.02032816 | 0 | HyperExposition | TG00400959 | LIMAD | LABEL1 | C | 287 |
| cm51 | 457919   | 457919   | 14 | 23 | 13,816 | 31,579 | 1.17969262 | 0.02032816 | 0 | HyperExposition | TG00400960 | LIMAD | LABEL1 | C | 287 |
| cm51 | 457919   | 457919   | 14 | 23 | 13,816 | 31,579 | 1.17969262 | 0.02032816 | 0 | HyperExposition | TG00400961 | LIMAD | LABEL1 | C | 287 |
| cm51 | 457919   | 457919   | 14 | 23 | 13,816 | 31,579 | 1.17969262 | 0.02032816 | 0 | HyperExposition | TG00400962 | LIMAD | LABEL1 | C | 287 |
| cm51 | 457919   | 457919   | 14 | 23 | 13,816 | 31,579 | 1.17969262 | 0.02032816 | 0 | HyperExposition | TG00400963 | LIMAD | LABEL1 | C | 287 |
| cm51 | 457919   | 457919   | 14 | 23 | 13,816 | 31,579 | 1.17969262 | 0.02032816 | 0 | HyperExposition | TG00400964 | LIMAD | LABEL1 | C | 287 |
| cm51 | 457919   | 457919   | 14 | 23 | 13,816 | 31,579 | 1.17969262 | 0.02032816 | 0 | HyperExposition | TG00400965 | LIMAD | LABEL1 | C | 287 |
| cm51 | 457919   | 457919   | 14 | 23 | 13,816 | 31,579 | 1.17969262 | 0.02032816 | 0 | HyperExposition | TG00400966 | LIMAD | LABEL1 | C | 28  |



Supplementary Table 7. The list of negatively-correlated genes between expression level and methylation level.

## Differentially expressed genes (DEGs) from RNA-Seq

| Gene     | Locus                    | GS FPKM (A) | GS FPKM (B) | Log2(B/A)     | P-value     | Expression change after exercise in GS |
|----------|--------------------------|-------------|-------------|---------------|-------------|----------------------------------------|
| FOXP2    | Chr4:71764132-72012020   | 0.0680683   | 0           | -1.79769e+308 | 0.0369233   | Low-expressed                          |
| GXYLT2   | Chr16:17474065-17553670  | 0.223271    | 0           | -1.79769e+308 | 0.0335125   | Low-expressed                          |
| SH2D4B   | Chr1:88561674-88654379   | 0.131498    | 0           | -1.79769e+308 | 0.0335125   | Low-expressed                          |
| SLC5A3   | Chr26:30639217-30670146  | 6.52548     | 10.0874     | 0.628406      | 0.0433971   | High-expressed                         |
| TMEM150B | Chr10:24471616-24498340  | 11.2547     | 18.1067     | 0.685998      | 0.0489095   | High-expressed                         |
| DEDD2    | Chr10:13553003-13573408  | 17.423      | 30.137      | 0.790539      | 0.00105037  | High-expressed                         |
| C1orf21  | Chr5:21315334-21458065   | 6.19695     | 12.24       | 0.98197       | 0.0135391   | High-expressed                         |
| NLRP12   | Chr10:22834672-22866121  | 2.2363      | 6.33784     | 1.50288       | 0.000012507 | High-expressed                         |
| LRP11    | Chr31:16978002-17011735  | 0.240771    | 0.700482    | 1.54069       | 0.027201    | High-expressed                         |
| ANGPT1   | Chr9:51942202-52181014   | 0           | 0.0859218   | 1.79769e+308  | 0.0345177   | High-expressed                         |
| FSTL4    | Chr14:42281899-42486963  | 0           | 0.0164148   | 1.79769e+308  | 0.0384396   | High-expressed                         |
| Gene     | Locus                    | JS FPKM (A) | JS FPKM (B) | Log2(B/A)     | P-value     | Expression change after exercise in JS |
| NCKAP5   | Chr18:16876570-17702260  | 0.125461    | 0.0128215   | -3.2906       | 0.0245383   | Low-expressed                          |
| PHC3     | Chr19:10518569-10590129  | 15.2939     | 6.11646     | -1.32218      | 0.00593945  | Low-expressed                          |
| SLC16A6  | Chr11:12371268-12389919  | 23.1525     | 10.8843     | -1.08892      | 0.0121751   | Low-expressed                          |
| CACNA1D  | Chr16:34062865-34381927  | 0.0377868   | 0           | -1.79769e+308 | 0.0436843   | Low-expressed                          |
| GNAL     | Chr8:38096950-38193302   | 0.238902    | 0           | -1.79769e+308 | 0.0371067   | Low-expressed                          |
| SCUBE2   | Chr7:78361864-78421344   | 0.0569065   | 0           | -1.79769e+308 | 0.0433786   | Low-expressed                          |
| TNFRSF21 | Chr20:45737669-45803833  | 2.8901      | 6.04327     | 1.06421       | 0.0259256   | High-expressed                         |
| CCS      | Chr12:26545317-26556416  | 17.7861     | 37.2994     | 1.0684        | 0.0297999   | High-expressed                         |
| TGM2     | Chr22:28368451-28401055  | 11.1224     | 25.4011     | 1.19142       | 0.00117231  | High-expressed                         |
| UNC93A   | Chr31:7737541-7780641    | 12.8184     | 30.5082     | 1.25099       | 0.0287247   | High-expressed                         |
| CYSTM1   | Chr14:36525183-36642135  | 24.9577     | 75.159      | 1.59046       | 0.0483555   | High-expressed                         |
| NFKBIA   | Chr1:172073462-172075841 | 204.95      | 899.854     | 2.13442       | 9.07634E-06 | High-expressed                         |
| CORO6    | Chr11:43380047-43389316  | 0.139187    | 0.678452    | 2.28522       | 0.0043599   | High-expressed                         |

## Differentially methylated regions (DMRs) from MeDIP-Seq

| Locus                    | Region   | GS #No. of nomalized tag (C) | GS #No. of nomalized tag (D) | log2(D/C)    | Methylation change after exercise in GS |
|--------------------------|----------|------------------------------|------------------------------|--------------|-----------------------------------------|
| chr4:71883226-71884016   | Intron   | 8.382902233                  | 14.0235048                   | 0.742325248  | Hypermethylation                        |
| chr16:17523312-17524090  | Intron   | 11.97557462                  | 25.88954732                  | 1.112274858  | Hypermethylation                        |
| chr1:88634905-88636084   | Intron   | 19.16091939                  | 29.12574073                  | 0.604127954  | Hypermethylation                        |
| chr26:30659825-30660957  | CDS      | 22.75359177                  | 14.0235048                   | -0.698247343 | Hypomethylation                         |
| chr10:24493821-24494734  | Intron   | 25.1487067                   | 11.86604252                  | -1.083645352 | Hypomethylation                         |
| chr10:13551779-13552578  | Promoter | 17.3645832                   | 9.169214675                  | -0.921277702 | Hypomethylation                         |
| chr5:21365884-21366919   | Intron   | 23.35237051                  | 12.94477366                  | -0.851199266 | Hypomethylation                         |
| chr10:22835202-22837013  | Intron   | 46.10596228                  | 29.6651063                   | -0.636186375 | Hypomethylation                         |
| chr31:17006150-17006808  | CDS      | 17.3645832                   | 10.78731138                  | -0.686812448 | Hypomethylation                         |
| chr9:52167932-52168543   | Intron   | 16.76580447                  | 8.629849105                  | -0.95811447  | Hypomethylation                         |
| chr14:42281774-42282989  | Intron   | 24.54992797                  | 14.56287037                  | -0.75342405  | Hypomethylation                         |
| Chr                      | Region   | JS #No. of nomalized tag (C) | JS #No. of nomalized tag (D) | log2(D/C)    | Methylation change after exercise in JS |
| chr18:17202202-17202867  | Intron   | 15.12845826                  | 23.66816689                  | 0.645683003  | Hypermethylation                        |
| chr19:10559357-10560782  | Intron   | 13.44751845                  | 27.61286137                  | 1.038000426  | Hypermethylation                        |
| chr11:12380345-12382804  | CDS      | 19.61096441                  | 47.89986156                  | 1.288361001  | Hypermethylation                        |
| chr16:34245727-34246767  | Intron   | 10.64595211                  | 18.59641684                  | 0.804719688  | Hypermethylation                        |
| chr8:38130307-38130965   | Intron   | 10.08563884                  | 15.77877793                  | 0.645683003  | Hypermethylation                        |
| chr7:78395986-78397691   | Intron   | 13.44751845                  | 28.17638916                  | 1.067146771  | Hypermethylation                        |
| chr20:45739955-45740750  | CDS      | 17.93002461                  | 11.83408345                  | -0.599429495 | Hypomethylation                         |
| chr12:26546342-26548572  | Intron   | 57.7122667                   | 32.68461142                  | -0.82026645  | Hypomethylation                         |
| chr22:28401186-28402536  | Promoter | 40.90286863                  | 26.48580581                  | -0.626982625 | Hypomethylation                         |
| chr31:7775322-7776231    | Intron   | 28.57597671                  | 18.03288906                  | -0.66417226  | Hypomethylation                         |
| chr14:36605515-36606545  | Intron   | 17.36971134                  | 11.27055566                  | -0.624015133 | Hypomethylation                         |
| chr1:172074178-172075231 | Intron   | 19.61096441                  | 10.1435001                   | -0.951104933 | Hypomethylation                         |
| chr11:43384670-43385728  | CDS      | 26.33472364                  | 16.90583349                  | -0.639445174 | Hypomethylation                         |

**Supplementary Table 8.** Distribution and frequency of methylation peaks over repeats in the genome.

| Repeat class   | Repeats in the genome | No. of peaks     |                |                 |                | Frequency of peaks |                |                 |                |
|----------------|-----------------------|------------------|----------------|-----------------|----------------|--------------------|----------------|-----------------|----------------|
|                |                       | JIGUSANG SERYEOK |                | GEUMBIT SESANG  |                | JIGUSANG SERYEOK   |                | GEUMBIT SESANG  |                |
|                |                       | Before exercise  | After exercise | Before exercise | After exercise | Before exercise    | After exercise | Before exercise | After exercise |
| DNA            | 364,428               | 2,458            | 2,227          | 1,787           | 2,407          | 0.007              | 0.006          | 0.005           | 0.007          |
| LINE           | 1,246,366             | 18,338           | 15,468         | 13,565          | 17,457         | 0.015              | 0.012          | 0.011           | 0.014          |
| Low complexity | 252,740               | 393              | 343            | 298             | 358            | 0.002              | 0.001          | 0.001           | 0.001          |
| LTR            | 436,921               | 3,826            | 3,743          | 3,042           | 3,779          | 0.009              | 0.009          | 0.007           | 0.009          |
| RC             | 2,424                 | 12               | 19             | 10              | 12             | 0.005              | 0.008          | 0.004           | 0.005          |
| RNA            | 696                   | 4                | 4              | 6               | 3              | 0.006              | 0.006          | 0.009           | 0.004          |
| rRNA           | 445                   | 13               | 10             | 11              | 11             | 0.029              | 0.022          | 0.025           | 0.025          |
| Satellite      | 1,344                 | 59               | 61             | 65              | 71             | 0.044              | 0.045          | 0.048           | 0.053          |
| scRNA          | 73                    | 1                | 1              | -               | 1              | 0.014              | 0.014          | -               | 0.014          |
| Simple repeat  | 199,308               | 1,213            | 1,024          | 800             | 1,032          | 0.006              | 0.005          | 0.004           | 0.005          |
| SINE           | 990,165               | 16,339           | 13,931         | 12,763          | 14,225         | 0.017              | 0.014          | 0.013           | 0.014          |
| snRNA          | 989                   | 9                | 10             | 8               | 16             | 0.009              | 0.010          | 0.008           | 0.016          |
| srpRNA         | 25                    | 2                | 1              | 2               | 1              | 0.080              | 0.040          | 0.080           | 0.040          |
| tRNA           | 14,097                | 51               | 56             | 49              | 55             | 0.004              | 0.004          | 0.003           | 0.004          |
| Unknown        | 8,133                 | 40               | 42             | 30              | 46             | 0.005              | 0.005          | 0.004           | 0.006          |
| Total          | 3,518,154             | 42,758           | 36,940         | 32,436          | 39,474         | 0.012              | 0.010          | 0.009           | 0.011          |

Supplementary Table 9. DMR-containing gene lists after GO and KEGG analysis of the two horses before and after exercise.

| Category      | Term                                                 | P-value     | Genes                                                                                                                                                                                                                                                                                                          | Count |
|---------------|------------------------------------------------------|-------------|----------------------------------------------------------------------------------------------------------------------------------------------------------------------------------------------------------------------------------------------------------------------------------------------------------------|-------|
| GOTERM_BP_FAT | Metal ion transport                                  | 0.004663668 | SLC12A8, SLC8A2, SLC39A11, KCNB1, TRPC7, SFXN4, SFXN1, TCN2, KCNIP1, SFXN5, CACNA2D4, KCNMB2, KCNQ5, ABCC9, KCNN3, SCN8A, CHRNA10                                                                                                                                                                              | 17    |
| GOTERM_BP_FAT | Protein amino acid phosphorylation                   | 7.03E-04    | PRKCA, PIK3CG, OBSCN, CDK5R1, FLT3, NLK, STRADA, PRKCH, EIF2A, TTN, CDKL5, CAMKK1, DAPK1, MAP4K3, IRAK3, PTK2, COL4A3BP, PDGFRA, SPTBN1, PDGFRB, GRK4, EIF2AK4, AKT3, NEK7                                                                                                                                     | 24    |
| GOTERM_BP_FAT | Regulation of small GTPase mediated signal transduc  | 2.96E-04    | OBSCN, ARHGEF7, KIAA1244, PREX1, IQGAP2, PSD4, TTN, DNMBP, ADAP1, TBC1D16, GARNL3, RASGRF2, GIT2, RASA3                                                                                                                                                                                                        | 14    |
| GOTERM_CC_FAT | Contractile fiber                                    | 0.003515576 | OBSCN, CDK5R1, SYNE1, TNNT1, MYH11, SPTBN1, MYOM1, TTN                                                                                                                                                                                                                                                         | 8     |
| GOTERM_CC_FAT | M band                                               | 3.27E-04    | OBSCN, SPTBN1, MYOM1, TTN                                                                                                                                                                                                                                                                                      | 4     |
| GOTERM_CC_FAT | Cytoskeleton                                         | 8.54E-05    | DNAH11, MAD1L1, PARD3, LMNB1, CNN3, CDC14A, DNAH14, FAM110B, IQGAP2, DNAH2, TTN, STAU1, PTK2, SORBS1, CDK5RAP2, MYOM1, IFNGR1, ZW10, NF2, MICAL2, KIF18B, SPATC1, SEPT10, DNMBP, DAPK1, ARPC1A, SYNE1, EPB41L1, TNNT1, CST6, TBCA, SPAG5, CGN, FRMD4A, MCPH1, NINL, MYH11, PEBP1, CLIP1, SPTBN1, PDE4DIP, ADD1 | 42    |
| GOTERM_MF_FAT | Small GTPase regulator activity                      | 4.74E-04    | OBSCN, ARHGEF7, KIAA1244, PREX1, IQGAP2, PSD4, TTN, DNMBP, ADAP1, TBC1D16, MAP4K3, GARNL3, RASGRF2, GIT2                                                                                                                                                                                                       | 14    |
| GOTERM_MF_FAT | Calmodulin binding                                   | 4.19E-04    | SLC8A2, CNN3, KCNN3, MYH11, IQGAP2, SPTBN1, TTN, CAMKK1, ADD1, DAPK1                                                                                                                                                                                                                                           | 10    |
| GOTERM_MF_FAT | Vascular endothelial growth factor receptor activity | 2.14E-04    | NRP2, FLT3, PDGFRA, PDGFRB                                                                                                                                                                                                                                                                                     | 4     |
| KEGG_PATHWAY  | Tight junction                                       | 0.011503665 | PRKCA, INADL, PARD3, EPB41L1, CGN, MYH11, PRKCH, AKT3                                                                                                                                                                                                                                                          | 8     |
| KEGG_PATHWAY  | Glioma                                               | 0.028459795 | PRKCA, PIK3CG, PDGFRA, PDGFRB, AKT3                                                                                                                                                                                                                                                                            | 5     |
